# Supplementary material for: Identification of Transcriptional Regulators of Immune Evasion across Cancers: An Alternative Immunotherapeutic Strategy for Cholangiocarcinoma
Source: Preprints.org preprint supplement (doi:10.20944/preprints202410.1274.v1), 2024-10-16
Supplement: Supplementary file 1 [file supplementary]

## Sheet: Key Resources Table
Key Resource Table
Biological Samples	Source	Identifier
Cancer Cell Lines
KKU-213	Japanese Collection of Research Bioresources Cell Bank	JCRB ID: JCRB1557
RBE	RIKEN Cell Bank	RIKEN Cell Bank ID: RCB1292
Deposited Data
TCGA PanCancer Atlas RNASeq Data	NCI Genomic Data Commons	https://gdc.cancer.gov/about-data/publications/pancanatlas,
Softwares and Algorithms
CIBERSORT	{Newman, 2019 #7}	https://cibersort.stanford.edu/
pheatmap R package	CRAN	https://cran.r-project.org/web/packages/pheatmap
Bioconductor	N/A	http://www.bioconductor.org/
limma R package	Bioconductor	https://bioconductor.org/packages/release/bioc/html/limma.html
edgeR R package	Bioconductor	https://bioconductor.org/packages/release/bioc/html/edgeR.html
iLINCS Signaling Pathway Impact Analysis	{Pilarczyk, 2022 #8}	http://www.ilincs.org/ilincs/
Expression2Kinases	{Clarke, 2018 #9}	https://maayanlab.cloud/X2K/

## Sheet: Table S1
Table S1 - Co-inhibitory Immune Checkpoint Gene Set
Gene Symbol	Description
TGFB1	transforming growth factor beta 1
IL10	interleukin 10
HAVCR2	hepatitis A virus cellular receptor 2
CD274	CD274 molecule
ADORA2A	adenosine A2a receptor
HMGB1	high mobility group box 1
IL13	interleukin 13
KIR2DL1	killer cell immunoglobulin like receptor, two Ig domains and long cytoplasmic tail 1
FGL1	fibrinogen like 1
KIR2DL3	killer cell immunoglobulin like receptor, two Ig domains and long cytoplasmic tail 3
SLAMF7	SLAM family member 7
IDO1	indoleamine 2,3-dioxygenase 1
IL4	interleukin 4
CD80	CD80 molecule
BTN3A2	butyrophilin subfamily 3 member A2
CD86	CD86 molecule
BTN3A1	butyrophilin subfamily 3 member A1
EDNRB	endothelin receptor type B
LGALS3	galectin 3
PVR	PVR cell adhesion molecule
CEACAM1	CEA cell adhesion molecule 1
TNFRSF14	TNF receptor superfamily member 14
CD276	CD276 molecule
PDCD1LG2	programmed cell death 1 ligand 2
VEGFA	vascular endothelial growth factor A
VTCN1	V-set domain containing T cell activation inhibitor 1
VEGFB	vascular endothelial growth factor B
ARG1	arginase 1

## Sheet: Table S2
Table S2 - Composite Scores calculated for every cancer type
Cancer Type	Gene	Composite Score	Average Enrichment Score	p-value	Hazard Ratio
ACC	EGR1	3.3702	2.29265	0.349	1.47
ACC	MYC	2.82223	1.55924	0.157	1.81
ACC	TP53	1.42002	1.07577	0.495	1.32
ACC	SOX2	0.61541	0.559464	0.826	1.1
ACC	GATA2	0.468665	0.381028	0.613	1.23
ACC	SMAD3	0.171391	0.100229	0.216	1.71
ACC	SMAD4	0.134352	0.103348	0.536	1.3
ACC	WT1	-1.16463	-0.510803	0.0517	2.28
ACC	TFAP2C	-1.46515	-1.17212	0.596	1.25
ACC	SMAD2	-3.07554	-0.99855	0.0123	3.08
ACC	DNAJC2	-5.95899	-0.80527	3.05e-05	7.4
BLCA	EGR1	2.79703	2.29265	0.196	1.22
BLCA	MYC	2.49479	1.55924	0.00238	1.6
BLCA	FLI1	2.08073	1.87454	0.51	1.11
BLCA	ESR1	1.29361	1.20898	0.684	1.07
BLCA	ERG	1.17835	0.899501	0.0823	1.31
BLCA	SOX2	0.732898	0.559464	0.0848	1.31
BLCA	SMAD4	0.12195	0.103348	0.274	1.18
BLCA	GATA1	-0.390439	-0.354945	0.546	1.1
BLCA	WT1	-0.776421	-0.510803	0.00743	1.52
BLCA	DNAJC2	-0.829428	-0.80527	0.845	1.03
BLCA	EOMES	-0.981922	-0.9722	0.927	1.01
BLCA	SMAD2	-1.02851	-0.99855	0.83	1.03
BLCA	TFAP2C	-1.25417	-1.17212	0.639	1.07
BRCA	TP53	1.14032	1.07577	0.779	1.06
BRCA	SOX2	0.727303	0.559464	0.204	1.3
BRCA	GATA2	0.392459	0.381028	0.874	1.03
BRCA	PPARD	0.0261545	0.017914	0.0635	1.46
BRCA	MITF	-0.0515867	-0.0482118	0.726	1.07
BRCA	WT1	-0.628288	-0.510803	0.311	1.23
BRCA	DNAJC2	-0.92606	-0.80527	0.508	1.15
CESC	EGR1	3.27849	2.29265	0.154	1.43
CESC	MYC	2.82223	1.55924	0.0202	1.81
CESC	ERG	2.08684	0.899501	0.00123	2.32
CESC	SMAD4	0.128151	0.103348	0.402	1.24
CESC	SMAD3	0.108247	0.100229	0.774	1.08
CESC	DNAJC2	-0.958271	-0.80527	0.494	1.19
CESC	SMAD2	-1.08842	-0.99855	0.737	1.09
CHOL	MYC	2.29208	1.55924	0.439	1.47
CHOL	ESR1	1.54749	1.20898	0.612	1.28
CHOL	SMAD3	0.240549	0.100229	0.0957	2.4
CHOL	PPARD	0.0184514	0.017914	0.946	1.03
CHOL	GATA1	-0.507571	-0.354945	0.467	1.43
CHOL	WT1	-0.735557	-0.510803	0.456	1.44
CHOL	DNAJC2	-0.83748	-0.80527	0.932	1.04
CHOL	ESR2	-1.80761	-1.59966	0.799	1.13
COAD	ERG	1.43021	0.899501	0.0814	1.59
COAD	TP53	1.31244	1.07577	0.452	1.22
COAD	ESR1	1.29361	1.20898	0.788	1.07
COAD	AR	1.09647	0.863363	0.368	1.27
COAD	SOX2	1.01263	0.559464	0.0244	1.81
COAD	GATA2	0.571542	0.381028	0.124	1.5
COAD	PPARD	0.0225717	0.017914	0.377	1.26
COAD	MITF	-0.0626754	-0.0482118	0.313	1.3
COAD	EOMES	-0.991644	-0.9722	0.939	1.02
COAD	TFAP2C	-1.39482	-1.17212	0.511	1.19
COAD	DNAJC2	-1.42533	-0.80527	0.0347	1.77
COAD	ESR2	-1.71163	-1.59966	0.788	1.07
COADREAD	EGR1	2.5907	2.29265	0.597	1.13
COADREAD	ERG	1.18734	0.899501	0.237	1.32
COADREAD	TP53	1.18335	1.07577	0.677	1.1
COADREAD	SOX2	1.13571	0.559464	0.00274	2.03
COADREAD	AR	1.04467	0.863363	0.422	1.21
COADREAD	GATA2	0.594404	0.381028	0.0542	1.56
COADREAD	PPARD	0.0206011	0.017914	0.549	1.15
COADREAD	MITF	-0.0756926	-0.0482118	0.0494	1.57
COADREAD	DNAJC2	-0.990482	-0.80527	0.373	1.23
COADREAD	TFAP2C	-1.69957	-1.17212	0.109	1.45
COADREAD	ESR2	-1.71163	-1.59966	0.767	1.07
DLBC	ERG	5.98168	0.899501	0.0442	6.65
DLBC	EGR1	4.01214	2.29265	0.458	1.75
DLBC	FLI1	2.15572	1.87454	0.859	1.15
DLBC	AR	1.13964	0.863363	0.713	1.32
DLBC	SMAD3	0.14433	0.100229	0.632	1.44
DLBC	PPARD	0.0420979	0.017914	0.294	2.35
DLBC	SMAD2	-1.20825	-0.99855	0.805	1.21
ESCA	EGR1	2.56777	2.29265	0.637	1.12
ESCA	FLI1	2.2307	1.87454	0.445	1.19
ESCA	GATA2	0.392459	0.381028	0.887	1.03
ESCA	WT1	-0.653828	-0.510803	0.287	1.28
GBM	EGR1	2.36143	2.29265	0.856	1.03
GBM	MYC	1.57483	1.55924	0.96	1.01
GBM	ESR1	1.42659	1.20898	0.381	1.18
GBM	GATA2	0.457234	0.381028	0.324	1.2
GBM	MITF	-0.0539973	-0.0482118	0.557	1.12
GBM	GATA1	-0.418835	-0.354945	0.382	1.18
GBM	WT1	-0.577208	-0.510803	0.508	1.13
GBM	DNAJC2	-0.821375	-0.80527	0.916	1.02
GBM	EOMES	-1.23469	-0.9722	0.211	1.27
GBM	ESR2	-1.61565	-1.59966	0.961	1.01
GBM	TFAP2C	-1.62925	-1.17212	0.0799	1.39
GBMLGG	EGR1	6.21308	2.29265	1.53e-12	2.71
GBMLGG	FLI1	2.64309	1.87454	0.0124	1.41
GBMLGG	TP53	2.45275	1.07577	4.13e-09	2.28
GBMLGG	ESR1	2.18825	1.20898	1.92e-05	1.81
GBMLGG	AR	1.13964	0.863363	0.0401	1.32
GBMLGG	ERG	0.953471	0.899501	0.669	1.06
GBMLGG	PPARD	0.0240048	0.017914	0.0321	1.34
GBMLGG	MITF	-0.061229	-0.0482118	0.0764	1.27
GBMLGG	WT1	-1.2055	-0.510803	8.64e-10	2.36
GBMLGG	TFAP2C	-1.35966	-1.17212	0.275	1.16
GBMLGG	ESR2	-1.8556	-1.59966	0.286	1.16
GBMLGG	EOMES	-2.28467	-0.9722	9.71e-10	2.35
GBMLGG	DNAJC2	-2.54465	-0.80527	5.53e-16	3.16
KICH	MYC	2.37005	1.55924	0.567	1.52
KICH	FLI1	1.93077	1.87454	0.964	1.03
KICH	ESR1	1.6563	1.20898	0.678	1.37
KICH	ERG	0.953471	0.899501	0.94	1.06
KICH	SOX2	0.660168	0.559464	0.831	1.18
KICH	PPARD	0.0474721	0.017914	0.228	2.65
KICH	MITF	-0.174527	-0.0482118	0.204	3.62
KICH	WT1	-1.17996	-0.510803	0.249	2.31
KICH	EOMES	-2.39161	-0.9722	0.22	2.46
KICH	SMAD2	-3.03559	-0.99855	0.157	3.04
KICH	ESR2	-6.0307	-1.59966	0.0845	3.77
KICH	DNAJC2	-8.14933	-0.80527	0.00755	10.12
KIPAN	MYC	2.47919	1.55924	0.00156	1.59
KIPAN	FLI1	2.15572	1.87454	0.334	1.15
KIPAN	TP53	1.40926	1.07577	0.0611	1.31
KIPAN	ERG	0.962466	0.899501	0.654	1.07
KIPAN	SOX2	0.934305	0.559464	0.00039	1.67
KIPAN	PPARD	0.0234674	0.017914	0.0597	1.31
KIPAN	WT1	-0.944986	-0.510803	3.55e-05	1.85
KIPAN	EOMES	-1.33191	-0.9722	0.0321	1.37
KIPAN	DNAJC2	-1.48975	-0.80527	2.24e-05	1.85
KIPAN	TFAP2C	-2.05121	-1.17212	0.000103	1.75
KIPAN	ESR2	-2.3195	-1.59966	0.00955	1.45
KIRC	MYC	1.66839	1.55924	0.666	1.07
KIRC	TP53	1.52759	1.07577	0.0378	1.42
KIRC	SOX2	1.09095	0.559464	7.19e-05	1.95
KIRC	PPARD	0.0238256	0.017914	0.0856	1.33
KIRC	WT1	-0.888798	-0.510803	0.000956	1.74
KIRC	DNAJC2	-1.64275	-0.80527	1.89e-05	2.04
KIRC	ESR2	-2.51146	-1.59966	0.00642	1.57
KIRC	TFAP2C	-2.64899	-1.17212	1.73e-06	2.26
KIRP	MYC	3.53948	1.55924	0.017	2.27
KIRP	FLI1	3.13047	1.87454	0.127	1.67
KIRP	EGR1	2.6824	2.29265	0.622	1.17
KIRP	TP53	2.50654	1.07577	0.0128	2.33
KIRP	ERG	1.70006	0.899501	0.0548	1.89
KIRP	ESR1	1.35406	1.20898	0.733	1.12
KIRP	SOX2	0.766466	0.559464	0.333	1.37
KIRP	GATA2	0.453424	0.381028	0.588	1.19
KIRP	SMAD3	0.155355	0.100229	0.201	1.55
KIRP	PPARD	0.021676	0.017914	0.567	1.21
KIRP	GATA1	-0.397538	-0.354945	0.727	1.12
KIRP	WT1	-0.725341	-0.510803	0.287	1.42
KIRP	DNAJC2	-1.57028	-0.80527	0.0467	1.95
KIRP	TFAP2C	-1.68785	-1.17212	0.274	1.44
KIRP	EOMES	-1.93468	-0.9722	0.038	1.99
LGG	EGR1	5.06676	2.29265	0.000137	2.21
LGG	ESR1	2.28497	1.20898	0.00231	1.89
LGG	FLI1	2.17446	1.87454	0.468	1.16
LGG	TP53	1.68896	1.07577	0.0279	1.57
LGG	AR	1.51089	0.863363	0.00721	1.75
LGG	PPARD	0.0236465	0.017914	0.172	1.32
LGG	MITF	-0.0593006	-0.0482118	0.312	1.23
LGG	WT1	-1.0165	-0.510803	0.000929	1.99
LGG	TFAP2C	-1.28933	-1.17212	0.648	1.1
LGG	EOMES	-2.05134	-0.9722	0.000391	2.11
LGG	ESR2	-2.3035	-1.59966	0.076	1.44
LGG	DNAJC2	-2.67349	-0.80527	2.14e-08	3.32
LIHC	MYC	1.62161	1.55924	0.822	1.04
LIHC	SMAD3	0.107245	0.100229	0.693	1.07
LIHC	PPARD	0.0193471	0.017914	0.689	1.08
LIHC	MITF	-0.053033	-0.0482118	0.605	1.1
LIHC	WT1	-0.735557	-0.510803	0.0452	1.44
LIHC	DNAJC2	-0.885797	-0.80527	0.585	1.1
LIHC	SMAD2	-1.39797	-0.99855	0.0627	1.4
LIHC	TFAP2C	-1.47687	-1.17212	0.203	1.26
LUAD	EGR1	2.45314	2.29265	0.661	1.07
LUAD	MYC	2.07379	1.55924	0.0621	1.33
LUAD	TP53	1.25865	1.07577	0.326	1.17
LUAD	AR	0.880631	0.863363	0.905	1.02
LUAD	SMAD3	0.128293	0.100229	0.108	1.28
LUAD	PPARD	0.0227508	0.017914	0.118	1.27
LUAD	WT1	-0.582316	-0.510803	0.389	1.14
LUAD	DNAJC2	-1.24817	-0.80527	0.00438	1.55
LUAD	SMAD2	-1.49783	-0.99855	0.00927	1.5
LUSC	EGR1	2.52192	2.29265	0.516	1.1
LUSC	FLI1	2.08073	1.87454	0.483	1.11
LUSC	MYC	1.62161	1.55924	0.815	1.04
LUSC	ESR1	1.45077	1.20898	0.232	1.2
LUSC	ERG	1.01644	0.899501	0.406	1.13
LUSC	PPARD	0.0188097	0.017914	0.762	1.05
LUSC	MITF	-0.0621933	-0.0482118	0.0916	1.29
LUSC	GATA1	-0.379791	-0.354945	0.635	1.07
LUSC	TFAP2C	-1.18384	-1.17212	0.926	1.01
MESO	EGR1	2.61362	2.29265	0.579	1.14
MESO	FLI1	2.58686	1.87454	0.175	1.38
MESO	TP53	1.17259	1.07577	0.73	1.09
MESO	ERG	1.0884	0.899501	0.439	1.21
MESO	GATA2	0.628697	0.381028	0.0376	1.65
MESO	SOX2	0.570653	0.559464	0.934	1.02
MESO	SMAD3	0.150343	0.100229	0.0954	1.5
MESO	SMAD4	0.106448	0.103348	0.912	1.03
MESO	PPARD	0.0214968	0.017914	0.445	1.2
MESO	GATA1	-0.468527	-0.354945	0.254	1.32
MESO	EOMES	-1.02081	-0.9722	0.838	1.05
MESO	SMAD2	-1.11838	-0.99855	0.649	1.12
MESO	DNAJC2	-1.28038	-0.80527	0.0547	1.59
MESO	ESR2	-1.67964	-1.59966	0.854	1.05
OV	EGR1	2.31558	2.29265	0.938	1.01
OV	FLI1	2.15572	1.87454	0.38	1.15
OV	ERG	0.917491	0.899501	0.923	1.02
OV	GATA2	0.647748	0.381028	0.00116	1.7
OV	PPARD	0.0222134	0.017914	0.189	1.24
OV	GATA1	-0.472076	-0.354945	0.08	1.33
OV	EOMES	-1.02081	-0.9722	0.765	1.05
OV	DNAJC2	-1.09517	-0.80527	0.0585	1.36
PAAD	EGR1	2.70533	2.29265	0.433	1.18
PAAD	MYC	2.37005	1.55924	0.0492	1.52
PAAD	AR	0.906531	0.863363	0.825	1.05
PAAD	SMAD3	0.148339	0.100229	0.0626	1.48
PAAD	MITF	-0.0539973	-0.0482118	0.584	1.12
PAAD	GATA1	-0.376241	-0.354945	0.787	1.06
PAAD	DNAJC2	-0.893849	-0.80527	0.607	1.11
PAAD	SMAD2	-1.04848	-0.99855	0.818	1.05
PAAD	TFAP2C	-1.52376	-1.17212	0.224	1.3
PCPG	ERG	1.31327	0.899501	0.674	1.46
PCPG	GATA2	0.514388	0.381028	0.739	1.35
PCPG	SMAD4	0.380319	0.103348	0.212	3.68
PCPG	SMAD3	0.128293	0.100229	0.787	1.28
PCPG	PPARD	0.0705812	0.017914	0.186	3.94
PCPG	MITF	-0.0689429	-0.0482118	0.695	1.43
PCPG	GATA1	-0.64245	-0.354945	0.509	1.81
PCPG	SMAD2	-1.48784	-0.99855	0.661	1.49
PCPG	ESR2	-2.63943	-1.59966	0.581	1.65
PCPG	DNAJC2	-3.08418	-0.80527	0.196	3.83
PRAD	PPARD	1.03557e+07	0.017914	0.016	5.78081e+08
PRAD	MYC	7.67147	1.55924	0.107	4.92
PRAD	TP53	5.50794	1.07577	0.0967	5.12
PRAD	SOX2	2.8141	0.559464	0.101	5.03
PRAD	SMAD4	0.208762	0.103348	0.408	2.02
PRAD	DNAJC2	-1.53806	-0.80527	0.447	1.91
PRAD	EOMES	-1.83746	-0.9722	0.454	1.89
PRAD	TFAP2C	-2.16842	-1.17212	0.472	1.85
PRAD	ESR2	-7.80632	-1.59966	0.109	4.88
READ	EGR1	4.26433	2.29265	0.226	1.86
READ	FLI1	3.2242	1.87454	0.303	1.72
READ	SOX2	1.99169	0.559464	0.0218	3.56
READ	ERG	1.96091	0.899501	0.145	2.18
READ	TP53	1.45229	1.07577	0.562	1.35
READ	AR	1.14827	0.863363	0.569	1.33
READ	GATA2	0.750626	0.381028	0.219	1.97
READ	SMAD3	0.192439	0.100229	0.219	1.92
READ	SMAD4	0.114716	0.103348	0.842	1.11
READ	MITF	-0.161992	-0.0482118	0.0277	3.36
READ	GATA1	-0.539516	-0.354945	0.417	1.52
READ	SMAD2	-1.59768	-0.99855	0.385	1.6
READ	TFAP2C	-3.07095	-1.17212	0.0634	2.62
SARC	EGR1	2.43021	2.29265	0.802	1.06
SARC	MYC	2.07379	1.55924	0.189	1.33
SARC	TP53	1.09728	1.07577	0.936	1.02
SARC	SMAD3	0.124284	0.100229	0.319	1.24
SARC	SMAD4	0.117816	0.103348	0.536	1.14
SARC	PPARD	0.0313495	0.017914	0.0117	1.75
SARC	WT1	-0.740665	-0.510803	0.0899	1.45
SARC	DNAJC2	-0.92606	-0.80527	0.527	1.15
SARC	SMAD2	-1.43791	-0.99855	0.0942	1.44
SARC	TFAP2C	-1.45343	-1.17212	0.329	1.24
SKCM	ERG	1.56513	0.899501	0.156	1.74
SKCM	TP53	1.22638	1.07577	0.741	1.14
SKCM	GATA2	0.396269	0.381028	0.925	1.04
SKCM	SMAD3	0.176403	0.100229	0.149	1.76
SKCM	SMAD4	0.14882	0.103348	0.34	1.44
SKCM	MITF	-0.0703893	-0.0482118	0.326	1.46
SKCM	WT1	-0.863258	-0.510803	0.166	1.69
SKCM	SMAD2	-1.1683	-0.99855	0.675	1.17
SKCM	TFAP2C	-1.37138	-1.17212	0.681	1.17
SKCM	DNAJC2	-1.44143	-0.80527	0.131	1.79
STAD	EGR1	2.6824	2.29265	0.339	1.17
STAD	FLI1	2.24944	1.87454	0.266	1.2
STAD	ESR1	1.63212	1.20898	0.0621	1.35
STAD	AR	1.42455	0.863363	0.00204	1.65
STAD	ERG	1.32227	0.899501	0.0183	1.47
STAD	SOX2	0.643384	0.559464	0.38	1.15
STAD	GATA2	0.476285	0.381028	0.17	1.25
STAD	SMAD4	0.105414	0.103348	0.914	1.02
STAD	MITF	-0.0617112	-0.0482118	0.123	1.28
STAD	GATA1	-0.454329	-0.354945	0.125	1.28
STAD	WT1	-0.607856	-0.510803	0.28	1.19
STAD	SMAD2	-1.08842	-0.99855	0.604	1.09
STAD	EOMES	-1.24442	-0.9722	0.125	1.28
STAD	ESR2	-1.72763	-1.59966	0.636	1.08
STES	EGR1	2.75118	2.29265	0.168	1.2
STES	FLI1	2.04324	1.87454	0.506	1.09
STES	ESR1	1.37823	1.20898	0.313	1.14
STES	AR	1.11374	0.863363	0.0537	1.29
STES	ERG	1.09739	0.899501	0.138	1.22
STES	SOX2	0.604221	0.559464	0.539	1.08
STES	GATA2	0.419131	0.381028	0.488	1.1
STES	MITF	-0.0597827	-0.0482118	0.109	1.24
STES	GATA1	-0.379791	-0.354945	0.629	1.07
STES	WT1	-0.607856	-0.510803	0.18	1.19
STES	EOMES	-1.04025	-0.9722	0.595	1.07
TGCT	FLI1	1.06621e+09	1.87454	0.0903	5.68788e+08
TGCT	TP53	5.62099e+08	1.07577	0.107	5.22509e+08
TGCT	MYC	3.13407	1.55924	0.562	2.01
TGCT	ESR1	2.30915	1.20898	0.59	1.91
TGCT	ERG	1.83498	0.899501	0.552	2.04
TGCT	SOX2	1.1525	0.559464	0.547	2.06
TGCT	GATA2	0.796349	0.381028	0.538	2.09
TGCT	SMAD4	0.204628	0.103348	0.57	1.98
TGCT	MITF	-0.0819601	-0.0482118	0.661	1.7
TGCT	GATA1	-0.844768	-0.354945	0.466	2.38
TGCT	WT1	-1.02161	-0.510803	0.565	2
TGCT	EOMES	-1.86662	-0.9722	0.588	1.92
THCA	AR	1.91667	0.863363	0.173	2.22
THCA	TP53	1.82881	1.07577	0.37	1.7
THCA	ERG	1.27729	0.899501	0.522	1.42
THCA	SMAD4	0.236666	0.103348	0.159	2.29
THCA	PPARD	0.0263336	0.017914	0.5	1.47
THCA	MITF	-0.0593006	-0.0482118	0.701	1.23
THCA	GATA1	-0.464977	-0.354945	0.618	1.31
THCA	SMAD2	-1.52778	-0.99855	0.437	1.53
THCA	WT1	-1.55795	-0.510803	0.074	3.05
THCA	ESR2	-2.07955	-1.59966	0.633	1.3
THYM	ESR1	3.10707	1.20898	0.262	2.57
THYM	TP53	1.50608	1.07577	0.698	1.4
THYM	ERG	1.25031	0.899501	0.701	1.39
THYM	SOX2	1.06298	0.559464	0.452	1.9
THYM	SMAD3	0.45103	0.100229	0.135	4.5
THYM	MITF	-0.24588	-0.0482118	0.0978	5.1
THYM	TFAP2C	-2.07465	-1.17212	0.504	1.77
THYM	EOMES	-5.08222e+08	-0.9722	0.024	5.22755e+08
UCEC	EGR1	2.54484	2.29265	0.769	1.11
UCEC	FLI1	2.28693	1.87454	0.593	1.22
UCEC	SMAD3	0.184421	0.100229	0.0988	1.84
UCEC	SMAD4	0.11885	0.103348	0.711	1.15
UCEC	MITF	-0.0583363	-0.0482118	0.602	1.21
UCEC	WT1	-0.679369	-0.510803	0.443	1.33
UCEC	DNAJC2	-1.08711	-0.80527	0.417	1.35
UCEC	SMAD2	-1.36801	-0.99855	0.394	1.37
UCEC	TFAP2C	-1.81679	-1.17212	0.25	1.55
UCEC	ESR2	-2.3195	-1.59966	0.32	1.45
UCS	FLI1	2.13697	1.87454	0.717	1.14
UCS	MYC	1.98024	1.55924	0.504	1.27
UCS	TP53	1.77502	1.07577	0.156	1.65
UCS	AR	1.13964	0.863363	0.438	1.32
UCS	ERG	0.917491	0.899501	0.96	1.02
UCS	SOX2	0.738493	0.559464	0.434	1.32
UCS	SMAD3	0.121277	0.100229	0.59	1.21
UCS	SMAD4	0.109548	0.103348	0.863	1.06
UCS	MITF	-0.0511046	-0.0482118	0.88	1.06
UCS	DNAJC2	-1.0388	-0.80527	0.473	1.29
UCS	SMAD2	-1.20825	-0.99855	0.6	1.21
UCS	ESR2	-1.95158	-1.59966	0.579	1.22
UVM	FLI1	6.59836	1.87454	0.00378	3.52
UVM	EGR1	3.14093	2.29265	0.466	1.37
UVM	AR	1.83033	0.863363	0.0809	2.12
UVM	ESR1	1.71675	1.20898	0.418	1.42
UVM	ERG	1.31327	0.899501	0.376	1.46
UVM	GATA2	0.518199	0.381028	0.472	1.36
UVM	SMAD3	0.120275	0.100229	0.664	1.2
UVM	SMAD4	0.104381	0.103348	0.979	1.01
UVM	WT1	-1.03693	-0.510803	0.103	2.03
UVM	DNAJC2	-1.56222	-0.80527	0.164	1.94
UVM	ESR2	-2.39948	-1.59966	0.352	1.5
UVM	TFAP2C	-3.3757	-1.17212	0.0302	2.88
UVM	EOMES	-3.59714	-0.9722	0.00418	3.7

## Sheet: Table S3
Table S3 - Ranked Candidate MR-IE per cancer type
Cancer	Top Ranking TF	2	3	4	5	6	7	8	9	10	11	12	13	14	15
ACC	EGR1	MYC	TP53	SOX2	GATA2	SMAD3	SMAD4	WT1	TFAP2C	SMAD2	DNAJC2
BLCA	EGR1	MYC	FLI1	ESR1	ERG	SOX2	SMAD4	GATA1	WT1	DNAJC2	EOMES	SMAD2	TFAP2C
BRCA	TP53	SOX2	GATA2	PPARD	MITF	WT1	DNAJC2
CESC	EGR1	MYC	ERG	SMAD4	SMAD3	DNAJC2	SMAD2
CHOL	MYC	ESR1	SMAD3	PPARD	GATA1	WT1	DNAJC2	ESR2
COAD	ERG	TP53	ESR1	AR	SOX2	GATA2	PPARD	MITF	EOMES	TFAP2C	DNAJC2	ESR2
COADREAD	EGR1	ERG	TP53	SOX2	AR	GATA2	PPARD	MITF	DNAJC2	TFAP2C	ESR2
DLBC	ERG	EGR1	FLI1	AR	SMAD3	PPARD	SMAD2
ESCA	EGR1	FLI1	GATA2	WT1
GBM	EGR1	MYC	ESR1	GATA2	MITF	GATA1	WT1	DNAJC2	EOMES	ESR2	TFAP2C
GBMLGG	EGR1	FLI1	TP53	ESR1	AR	ERG	PPARD	MITF	WT1	TFAP2C	ESR2	EOMES	DNAJC2
KICH	MYC	FLI1	ESR1	ERG	SOX2	PPARD	MITF	WT1	EOMES	SMAD2	ESR2	DNAJC2
KIPAN	MYC	FLI1	TP53	ERG	SOX2	PPARD	WT1	EOMES	DNAJC2	TFAP2C	ESR2
KIRC	MYC	TP53	SOX2	PPARD	WT1	DNAJC2	ESR2	TFAP2C
KIRP	MYC	FLI1	EGR1	TP53	ERG	ESR1	SOX2	GATA2	SMAD3	PPARD	GATA1	WT1	DNAJC2	TFAP2C	EOMES
LGG	EGR1	ESR1	FLI1	TP53	AR	PPARD	MITF	WT1	TFAP2C	EOMES	ESR2	DNAJC2
LIHC	MYC	SMAD3	PPARD	MITF	WT1	DNAJC2	SMAD2	TFAP2C
LUAD	EGR1	MYC	TP53	AR	SMAD3	PPARD	WT1	DNAJC2	SMAD2
LUSC	EGR1	FLI1	MYC	ESR1	ERG	PPARD	MITF	GATA1	TFAP2C
MESO	EGR1	FLI1	TP53	ERG	GATA2	SOX2	SMAD3	SMAD4	PPARD	GATA1	EOMES	SMAD2	DNAJC2	ESR2
OV	EGR1	FLI1	ERG	GATA2	PPARD	GATA1	EOMES	DNAJC2
PAAD	EGR1	MYC	AR	SMAD3	MITF	GATA1	DNAJC2	SMAD2	TFAP2C
PCPG	ERG	GATA2	SMAD4	SMAD3	PPARD	MITF	GATA1	SMAD2	ESR2	DNAJC2
PRAD	PPARD	MYC	TP53	SOX2	SMAD4	DNAJC2	EOMES	TFAP2C	ESR2
READ	EGR1	FLI1	SOX2	ERG	TP53	AR	GATA2	SMAD3	SMAD4	MITF	GATA1	SMAD2	TFAP2C
SARC	EGR1	MYC	TP53	SMAD3	SMAD4	PPARD	WT1	DNAJC2	SMAD2	TFAP2C
SKCM	ERG	TP53	GATA2	SMAD3	SMAD4	MITF	WT1	SMAD2	TFAP2C	DNAJC2
STAD	EGR1	FLI1	ESR1	AR	ERG	SOX2	GATA2	SMAD4	MITF	GATA1	WT1	SMAD2	EOMES	ESR2
STES	EGR1	FLI1	ESR1	AR	ERG	SOX2	GATA2	MITF	GATA1	WT1	EOMES
TGCT	FLI1	TP53	MYC	ESR1	ERG	SOX2	GATA2	SMAD4	MITF	GATA1	WT1	EOMES
THCA	AR	TP53	ERG	SMAD4	PPARD	MITF	GATA1	SMAD2	WT1	ESR2
THYM	ESR1	TP53	ERG	SOX2	SMAD3	MITF	TFAP2C	EOMES
UCEC	EGR1	FLI1	SMAD3	SMAD4	MITF	WT1	DNAJC2	SMAD2	TFAP2C	ESR2
UCS	FLI1	MYC	TP53	AR	ERG	SOX2	SMAD3	SMAD4	MITF	DNAJC2	SMAD2	ESR2
UVM	FLI1	EGR1	AR	ESR1	ERG	GATA2	SMAD3	SMAD4	WT1	DNAJC2	ESR2	TFAP2C	EOMES

## Sheet: Table S4
Table S4: Differentially Expressed Proteins with MYC inhibitor treatment
Protein Name	ID	P-Value	Adjusted P.Value	Treatment_vs_Control_ratio	Control_centered	Treatment_centered
ABHD17C	Q6PCB6	1.87596e-05	1.63e-14	-4.37	2.18	-2.18
ACTBL2	Q562R1	4.43913e-06	1.63e-14	-2.22	1.11	-1.11
AHSG	P02765	0.000925683	0.00468	-1.16	0.581	-0.581
AJUBA	Q96IF1	0.00124255	0.0103	4.88	-2.44	2.44
AZIN1	O14977	5.8616e-07	1.63e-14	-5.54	2.77	-2.77
B4GALT6	Q9UBX8	0.000849307	0.00362	1.64	-0.82	0.82
BZW2	Q9Y6E2	7.26722e-05	1.38e-08	1.61	-0.804	0.804
C15orf56	Q8N910	1.49633e-06	1.63e-14	-3.51	1.76	-1.76
CA2	P00918	0.00024406	2.83e-05	1.34	-0.671	0.671
CALCRL	Q16602	4.78469e-05	4.11e-10	-3.19	1.6	-1.6
CDO1	Q16878	2.96322e-06	1.63e-14	5.56	-2.78	2.78
CORIN	Q9Y5Q5	0.00174671	0.0223	-1.19	0.593	-0.593
CSPG4	Q6UVK1	8.31415e-06	1.63e-14	-4.56	2.28	-2.28
CUX2	O14529	0.00155687	0.0172	-2.08	1.04	-1.04
CYCS	P99999	0.00072233	0.00217	1.06	-0.532	0.532
ENTPD1	P49961	0.000183332	6.3e-06	1.42	-0.71	0.71
FABP5	Q01469	0.000398272	0.000259	1.19	-0.595	0.595
FBLN1	P23142	0.000821214	0.00327	-1.07	0.534	-0.534
GPS1	Q13098	0.00119711	0.00943	1.14	-0.568	0.568
H1F0	P07305	0.000282132	5.65e-05	5.69	-2.84	2.84
HNRNPD	Q14103	0.00163954	0.0194	1.06	-0.532	0.532
IMUP	Q9GZP8	0.000118651	4.79e-07	-1.81	0.905	-0.905
KRT1	P04264	7.91999e-06	1.63e-14	1.95	-0.977	0.977
KRT10	P13645	5.7604e-06	1.63e-14	2.03	-1.01	1.01
KRT9	P35527	4.18431e-06	1.63e-14	2.04	-1.02	1.02
MAP2K1	Q02750	3.92864e-05	6.03e-11	2.2	-1.1	1.1
MYCBP	Q99417	0.000153029	2.19e-06	2.11	-1.05	1.05
MYO16	Q9Y6X6	6.44858e-05	5.36e-09	-1.29	0.645	-0.645
NAA50	Q9GZZ1	1.40001e-05	1.63e-14	2.37	-1.18	1.18
NUTM2A;NUTM2D	Q8IVF1;Q5VT03	0.00015176	2.09e-06	-2.41	1.2	-1.2
P0DTA3	P0DTA3	5.20146e-06	1.63e-14	2.22	-1.11	1.11
PARVA	Q9NVD7	3.143e-06	1.63e-14	5.17	-2.58	2.58
PLK2	Q9NYY3	0.000314354	9.32e-05	-1.9	0.951	-0.951
PSMA2	P25787	0.000108769	2.75e-07	1.4	-0.699	0.699
PZP	P20742	1.11947e-06	1.63e-14	3.34	-1.67	1.67
REV__A6NES4	REV__A6NES4	1.49597e-07	1.63e-14	-6.29	3.15	-3.15
REV__A8MXV4	REV__A8MXV4	0.00144456	0.0147	-3.33	1.66	-1.66
REV__Q10570	REV__Q10570	0.000103581	1.98e-07	2.92	-1.46	1.46
REV__Q13155	REV__Q13155	1.26198e-05	1.63e-14	3.21	-1.6	1.6
REV__Q13542	REV__Q13542	5.47323e-07	1.63e-14	3.15	-1.57	1.57
REV__Q2KHR2	REV__Q2KHR2	0.000121029	5.4e-07	1.38	-0.692	0.692
REV__Q2NKJ3	REV__Q2NKJ3	6.39181e-05	5.01e-09	2.78	-1.39	1.39
REV__Q6P4A7	REV__Q6P4A7	1.4949e-06	1.63e-14	-2.43	1.21	-1.21
REV__Q6QHC5	REV__Q6QHC5	9.10239e-06	1.63e-14	-2.1	1.05	-1.05
REV__Q8NFQ6	REV__Q8NFQ6	6.1836e-05	3.87e-09	-1.54	0.772	-0.772
REV__Q8NFY4	REV__Q8NFY4	0.00240592	0.0436	1.36	-0.682	0.682
REV__Q8NGN8;REV__Q6IF82	REV__Q8NGN8;REV__Q6IF82	5.41807e-05	1.27e-09	2.26	-1.13	1.13
REV__Q96AY2	REV__Q96AY2	0.000845504	0.00357	3.1	-1.55	1.55
REV__Q96FN5	REV__Q96FN5	1.88713e-05	1.63e-14	-2.27	1.14	-1.14
REV__Q96IX9	REV__Q96IX9	0.000234845	2.35e-05	4.25	-2.12	2.12
REV__Q96NG3	REV__Q96NG3	0.00147344	0.0153	2.5	-1.25	1.25
REV__Q9BYU1	REV__Q9BYU1	4.8183e-08	1.63e-14	-7.47	3.74	-3.74
REV__Q9NR96	REV__Q9NR96	1.00189e-06	1.63e-14	7.54	-3.77	3.77
REV__Q9Y467	REV__Q9Y467	3.41358e-05	1.42e-11	-1.71	0.854	-0.854
RHOG	P84095	0.000577379	0.000997	-1.16	0.582	-0.582
RPL38	P63173	0.00045674	0.000437	-1.49	0.746	-0.746
SHOC2	Q9UQ13	1.37704e-06	1.63e-14	4.94	-2.47	2.47
SLC5A11	Q8WWX8	1.2156e-05	1.63e-14	-2.96	1.48	-1.48
ST6GALNAC2	Q9UJ37	1.10327e-05	1.63e-14	-2.89	1.45	-1.45
STMN2	Q93045	0.000123868	6.2e-07	-4.68	2.34	-2.34
STXBP2	Q15833	0.00142346	0.0142	1.19	-0.596	0.596
TBRG4	Q969Z0	0.000585736	0.00104	-1.08	0.542	-0.542
TIMM13	Q9Y5L4	7.30539e-05	1.43e-08	2.13	-1.06	1.06
TPM4	P67936	0.00106125	0.00689	1.36	-0.678	0.678
TTI1	O43156	1.44301e-05	1.63e-14	4.89	-2.44	2.44
TXN	P10599	0.00028176	5.61e-05	2.02	-1.01	1.01
WDSUB1	Q8N9V3	7.62094e-06	1.63e-14	-4.09	2.05	-2.05
45537	Q15019	0.279691	0.886	-0.141	0.0704	-0.0704
45542	Q16181	0.226142	0.873	-0.12	0.0599	-0.0599
45544	Q9UHD8	0.00859782	0.263	-0.503	0.251	-0.251
45546	Q9NVA2	0.0361467	0.646	-0.253	0.126	-0.126
A1CF	Q9NQ94	0.0640129	0.747	-0.83	0.415	-0.415
A2M	P01023	0.834205	0.933	0.0283	-0.0142	0.0142
AAMP	Q13685	0.0416584	0.674	-1.91	0.954	-0.954
AARS	P49588	0.81342	0.932	-0.0239	0.012	-0.012
AARSD1	Q9BTE6	0.805923	0.932	-0.0389	0.0195	-0.0195
ABCA13	Q86UQ4	0.217111	0.87	0.497	-0.248	0.248
ABCC3	O15438	0.140003	0.837	2.19	-1.1	1.1
ABCD3	P28288	0.453384	0.91	-0.246	0.123	-0.123
ABCE1	P61221	0.101375	0.805	-0.195	0.0973	-0.0973
ABCF1	Q8NE71	0.190353	0.861	-0.699	0.349	-0.349
ABHD10	Q9NUJ1	0.200139	0.865	0.282	-0.141	0.141
ABHD14A	Q9BUJ0	0.00683213	0.208	-0.92	0.46	-0.46
ABHD3	Q8WU67	0.203145	0.866	1.17	-0.587	0.587
ABI1	Q8IZP0	0.294356	0.888	-0.18	0.0901	-0.0901
ABRACL	Q9P1F3	0.51166	0.915	0.257	-0.129	0.129
ACAA1	P09110	0.882396	0.935	-0.0257	0.0129	-0.0129
ACAA2	P42765	0.64993	0.924	-0.0867	0.0433	-0.0433
ACAD9	Q9H845	0.026588	0.576	0.297	-0.148	0.148
ACADL	P28330	0.216906	0.87	1.73	-0.864	0.864
ACADVL	P49748	0.0240195	0.55	0.426	-0.213	0.213
ACAT1	P24752	0.0166138	0.449	-0.379	0.189	-0.189
ACAT2	Q9BWD1	0.733428	0.928	0.037	-0.0185	0.0185
ACE	P12821	0.117022	0.82	1.01	-0.503	0.503
ACLY	P53396	0.338197	0.896	-0.21	0.105	-0.105
ACO2	Q99798	0.655843	0.924	-0.0624	0.0312	-0.0312
ACOT7	O00154	0.207831	0.867	0.221	-0.11	0.11
ACOT8	O14734	0.202683	0.866	3.21	-1.61	1.61
ACOT9	Q9Y305	0.132298	0.832	0.233	-0.116	0.116
ACP1	P24666	0.229601	0.874	0.138	-0.0691	0.0691
ACPT	Q9BZG2	0.753421	0.929	-0.0754	0.0377	-0.0377
ACSF3	Q4G176	0.342489	0.896	0.808	-0.404	0.404
ACSL3	O95573	0.51857	0.915	-0.0814	0.0407	-0.0407
ACTB	P60709	0.0414772	0.674	-0.95	0.475	-0.475
ACTC1	P68032	0.0268121	0.578	4.64	-2.32	2.32
ACTG1	P63261	0.0539779	0.721	0.276	-0.138	0.138
ACTL6A	O96019	0.7247	0.928	0.0387	-0.0194	0.0194
ACTN1	P12814	0.318364	0.893	0.191	-0.0953	0.0953
ACTN4	O43707	0.00374049	0.0956	0.481	-0.241	0.241
ACTR10	Q9NZ32	0.256134	0.881	-1.58	0.79	-0.79
ACTR1A	P61163	0.235607	0.875	-0.141	0.0705	-0.0705
ACTR1B	P42025	0.20698	0.867	-0.165	0.0827	-0.0827
ACTR2	P61160	0.227726	0.873	-0.188	0.0942	-0.0942
ACTR3	P61158	0.0105901	0.32	-0.388	0.194	-0.194
ADAR	P55265	0.00951618	0.291	-0.559	0.28	-0.28
ADCY6	O43306	0.278923	0.885	-1.39	0.697	-0.697
ADH5	P11766	0.388925	0.903	-0.343	0.171	-0.171
ADIRF	Q15847	0.106	0.81	0.528	-0.264	0.264
ADK	P55263	0.184651	0.859	-0.184	0.0918	-0.0918
ADO	Q96SZ5	0.116711	0.82	-2.43	1.22	-1.22
ADRM1	Q16186	0.222026	0.872	0.118	-0.0588	0.0588
ADSL	P30566	0.661598	0.925	-0.061	0.0305	-0.0305
ADSS	P30520	0.0403192	0.668	0.653	-0.326	0.326
AFP	P02771	0.0163911	0.445	-0.436	0.218	-0.218
AGPS	O00116	0.0192677	0.491	1.21	-0.607	0.607
AHCY	P23526	0.00143361	0.0144	0.736	-0.368	0.368
AHCYL2	Q96HN2	0.0316591	0.617	-0.337	0.169	-0.169
AHDC1	Q5TGY3	0.499446	0.914	-0.72	0.36	-0.36
AHNAK	Q09666	0.00116061	0.00872	0.842	-0.421	0.421
AHNAK2	Q8IVF2	0.468299	0.911	-0.135	0.0675	-0.0675
AHSA1	O95433	0.00290743	0.0628	1.01	-0.506	0.506
AIFM1	O95831	0.13411	0.833	-0.311	0.155	-0.155
AIMP1	Q12904	0.607471	0.922	-0.0786	0.0393	-0.0393
AIMP2	Q13155	0.718897	0.928	0.043	-0.0215	0.0215
AIP	O00170	0.111564	0.816	1.02	-0.51	0.51
AK1	P00568	0.0568157	0.729	0.57	-0.285	0.285
AK2	P54819	0.412745	0.905	-0.0876	0.0438	-0.0438
AK3	Q9UIJ7	0.666639	0.925	-0.331	0.166	-0.166
AK4	P27144	0.10557	0.81	-0.416	0.208	-0.208
AKAP12	Q02952	0.00519949	0.151	0.906	-0.453	0.453
AKR1A1	P14550	0.350535	0.898	0.469	-0.235	0.235
AKR1B1	P15121	0.642356	0.924	0.0456	-0.0228	0.0228
AKR1D1	P51857	0.828754	0.933	0.311	-0.155	0.155
AKR7A2	O43488	0.347494	0.897	-0.287	0.143	-0.143
ALB	P02768	0.00187323	0.0259	-0.712	0.356	-0.356
ALCAM	Q13740	0.896022	0.935	0.0187	-0.00935	0.00935
ALDH18A1	P54886	0.0861719	0.787	0.203	-0.102	0.102
ALDH1A3	P47895	0.613541	0.922	0.0961	-0.048	0.048
ALDH3A2	P51648	0.407245	0.905	-0.84	0.42	-0.42
ALDH7A1	P49419	0.157555	0.847	0.347	-0.173	0.173
ALDH9A1	P49189	0.081838	0.781	0.674	-0.337	0.337
ALDOA	P04075	0.00857507	0.263	0.428	-0.214	0.214
ALDOC	P09972	0.000424426	0.000333	0.786	-0.393	0.393
ALOX15B	O15296	0.600882	0.921	-0.671	0.335	-0.335
ALYREF	Q86V81	0.0139428	0.397	-0.433	0.217	-0.217
AMOT	Q4VCS5	0.0922253	0.795	0.285	-0.143	0.143
ANGEL1	Q9UNK9	0.722259	0.928	-0.393	0.196	-0.196
ANKRD26	Q9UPS8	0.0484814	0.702	-0.364	0.182	-0.182
ANKRD31	Q8N7Z5	0.809448	0.932	-0.359	0.179	-0.179
ANKRD32	Q9BQI6	0.0657129	0.751	-2.86	1.43	-1.43
ANKS1B	Q7Z6G8	0.757532	0.93	-0.151	0.0753	-0.0753
ANP32A	P39687	0.554889	0.918	0.114	-0.0569	0.0569
ANP32B	Q92688	0.00259409	0.0507	0.654	-0.327	0.327
ANP32E	Q9BTT0	0.383271	0.902	0.301	-0.151	0.151
ANXA1	P04083	0.0639985	0.747	0.642	-0.321	0.321
ANXA11	P50995	0.566326	0.919	0.11	-0.0552	0.0552
ANXA2	P07355	0.662165	0.925	-0.0723	0.0361	-0.0361
ANXA3	P12429	0.342311	0.896	-0.124	0.0618	-0.0618
ANXA5	P08758	0.772036	0.93	0.0282	-0.0141	0.0141
ANXA7	P20073	0.744073	0.929	0.0394	-0.0197	0.0197
ANXA8L2	Q5VT79	0.0888999	0.791	0.441	-0.22	0.22
AP1B1	Q10567	0.533476	0.916	0.192	-0.0962	0.0962
AP1G1	O43747	0.447506	0.909	-0.156	0.0781	-0.0781
AP1G2	O75843	0.468453	0.911	0.614	-0.307	0.307
AP1M2	Q9Y6Q5	0.732435	0.928	0.084	-0.042	0.042
AP2A1	O95782	0.130629	0.831	0.486	-0.243	0.243
AP2B1	P63010	0.653649	0.924	0.0478	-0.0239	0.0239
AP2M1	Q96CW1	0.951675	0.937	-0.00574	0.00287	-0.00287
APEH	P13798	0.509514	0.915	-0.104	0.0521	-0.0521
APEX1	P27695	0.179999	0.857	0.281	-0.14	0.14
API5	Q9BZZ5	0.886792	0.935	0.0157	-0.00784	0.00784
APMAP	Q9HDC9	0.0814204	0.78	-0.339	0.17	-0.17
APOA1BP	Q8NCW5	0.168057	0.852	-1.8	0.898	-0.898
APPL2	Q8NEU8	0.180219	0.857	1.99	-0.994	0.994
APRT	P07741	0.82083	0.932	-0.0208	0.0104	-0.0104
ARCN1	P48444	0.0122352	0.361	1.09	-0.547	0.547
ARF3;ARF1	P61204;P84077	0.031778	0.618	0.305	-0.153	0.153
ARF4	P18085	0.000463665	0.000461	-0.652	0.326	-0.326
ARFGAP2	Q8N6H7	0.121394	0.824	-0.634	0.317	-0.317
ARHGAP1	Q07960	0.562236	0.919	0.0738	-0.0369	0.0369
ARHGDIA	P52565	0.783294	0.931	-0.0313	0.0157	-0.0157
ARHGDIB	P52566	0.285406	0.887	0.15	-0.0752	0.0752
ARL1	P40616	0.581366	0.92	0.172	-0.0861	0.0861
ARL6IP5	O75915	0.104691	0.809	0.175	-0.0873	0.0873
ARL8B	Q9NVJ2	0.720627	0.928	-0.0941	0.047	-0.047
ARNTL2	Q8WYA1	0.198012	0.864	1.88	-0.94	0.94
ARPC1A	Q92747	0.715237	0.928	-0.0856	0.0428	-0.0428
ARPC1B	O15143	0.0983629	0.802	0.198	-0.0988	0.0988
ARPC2	O15144	0.907804	0.936	0.0123	-0.00616	0.00616
ARPC3	O15145	0.825512	0.933	0.058	-0.029	0.029
ARPC4	P59998	0.438617	0.908	0.217	-0.108	0.108
ARPC5	O15511	0.71686	0.928	0.0851	-0.0426	0.0426
ARPC5L	Q9BPX5	0.68368	0.926	0.081	-0.0405	0.0405
ART4	Q93070	0.973065	0.938	0.0305	-0.0153	0.0153
ASCC1	Q8N9N2	0.365734	0.9	-0.713	0.357	-0.357
ASNA1	O43681	0.0972538	0.801	-0.206	0.103	-0.103
ASS1	P00966	0.252708	0.88	0.34	-0.17	0.17
ATF7IP	Q6VMQ6	0.298047	0.889	-0.616	0.308	-0.308
ATG3	Q9NT62	0.459728	0.91	-0.249	0.124	-0.124
ATIC	P31939	0.27704	0.885	-0.107	0.0533	-0.0533
ATL3	Q6DD88	0.137937	0.836	0.251	-0.126	0.126
ATOX1	O00244	0.730907	0.928	0.0992	-0.0496	0.0496
ATP1A1	P05023	0.582804	0.92	0.0505	-0.0252	0.0252
ATP1A3	P13637	0.0446449	0.688	-0.534	0.267	-0.267
ATP1B3	P54709	0.381062	0.902	0.0836	-0.0418	0.0418
ATP2A2	P16615	0.232751	0.875	0.139	-0.0697	0.0697
ATP5A1	P25705	0.832407	0.933	0.024	-0.012	0.012
ATP5B	P06576	0.861603	0.934	0.0205	-0.0103	0.0103
ATP5C1	P36542	0.182464	0.858	-0.212	0.106	-0.106
ATP5D	P30049	0.888019	0.935	-0.128	0.0641	-0.0641
ATP5F1	P24539	0.0296408	0.602	-0.527	0.264	-0.264
ATP5H	O75947	0.462098	0.91	-0.125	0.0627	-0.0627
ATP5L	O75964	0.18154	0.858	1.03	-0.513	0.513
ATP5O	P48047	0.0323245	0.622	0.297	-0.149	0.149
ATP6V1A	P38606	0.260607	0.882	-0.154	0.0769	-0.0769
ATP6V1B2	P21281	0.917282	0.936	-0.0118	0.00589	-0.00589
ATP6V1H	Q9UI12	0.126926	0.828	-0.761	0.381	-0.381
ATXN10	Q9UBB4	0.233595	0.875	0.145	-0.0726	0.0726
ATXN2	Q99700	0.244693	0.878	1.09	-0.544	0.544
ATXN2L	Q8WWM7	0.121497	0.824	-0.373	0.186	-0.186
B2M	P61769	0.0540707	0.721	1.09	-0.545	0.545
BAG2	O95816	0.242989	0.877	0.11	-0.0548	0.0548
BAG3	O95817	0.226491	0.873	0.241	-0.121	0.121
BAG6	P46379	0.0564175	0.728	0.29	-0.145	0.145
BAIAP2	Q9UQB8	0.327116	0.894	1.5	-0.751	0.751
BBS1	Q8NFJ9	0.0564189	0.728	0.839	-0.419	0.419
BCAP31	P51572	0.189351	0.861	0.21	-0.105	0.105
BCAS2	O75934	0.501261	0.914	-0.0717	0.0358	-0.0358
BCCIP	Q9P287	0.969578	0.938	0.005	-0.0025	0.0025
BCL2L14	Q9BZR8	0.697702	0.927	0.175	-0.0877	0.0877
BEND4	Q6ZU67	0.46954	0.911	0.164	-0.0822	0.0822
BGN	P21810	0.436371	0.908	0.37	-0.185	0.185
BID	P55957	0.65634	0.924	0.157	-0.0784	0.0784
BLOC1S5	Q8TDH9	0.0276719	0.585	3.67	-1.83	1.83
BLVRB	P30043	0.00126897	0.0109	-0.729	0.364	-0.364
BOLA2	Q9H3K6	0.749355	0.929	0.0468	-0.0234	0.0234
BPNT1	O95861	0.0148256	0.415	0.459	-0.229	0.229
BRK1	Q8WUW1	0.956456	0.938	0.0151	-0.00754	0.00754
BRSK1	Q8TDC3	0.101443	0.806	-0.332	0.166	-0.166
BRWD1	Q9NSI6	0.0587672	0.734	-2.83	1.41	-1.41
BSG	P35613	0.0918229	0.794	-0.283	0.141	-0.141
BTAF1	O14981	0.0885462	0.79	0.46	-0.23	0.23
BTF3	P20290	0.171989	0.854	0.31	-0.155	0.155
BTF3L4	Q96K17	0.0138818	0.396	0.342	-0.171	0.171
BUB1	O43683	0.987142	0.939	0.00275	-0.00137	0.00137
BUB3	O43684	0.806719	0.932	-0.0241	0.012	-0.012
BZW1	Q7L1Q6	0.851418	0.934	0.0333	-0.0167	0.0167
C12orf10	Q9HB07	0.393334	0.903	0.116	-0.0578	0.0578
C14orf159	Q7Z3D6	0.586593	0.92	0.407	-0.204	0.204
C14orf166	Q9Y224	0.291118	0.888	-0.287	0.143	-0.143
C15orf62	A8K5M9	0.217563	0.87	-2.21	1.1	-1.1
C16orf62	Q7Z3J2	0.131889	0.832	1.85	-0.925	0.925
C1QBP	Q07021	0.310892	0.891	1.15	-0.574	0.574
C4A	P0C0L4	0.813859	0.932	0.0486	-0.0243	0.0243
C8orf76	Q96K31	0.0560241	0.727	-2.29	1.15	-1.15
C9orf84	Q5VXU9	0.112456	0.816	-0.553	0.276	-0.276
CACYBP	Q9HB71	0.162565	0.849	-0.233	0.116	-0.116
CAD	P27708	0.487272	0.913	0.113	-0.0567	0.0567
CALB1	P05937	0.10826	0.812	0.586	-0.293	0.293
CALR	P27797	0.0944949	0.798	0.262	-0.131	0.131
CALU	O43852	0.272061	0.884	1.53	-0.766	0.766
CAND1	Q86VP6	0.468419	0.911	0.0848	-0.0424	0.0424
CANX	P27824	0.0680377	0.756	-0.332	0.166	-0.166
CAP1	Q01518	0.462689	0.91	0.196	-0.0981	0.0981
CAPG	P40121	0.360132	0.899	-0.0984	0.0492	-0.0492
CAPN1	P07384	0.0553137	0.725	-0.403	0.202	-0.202
CAPN2	P17655	0.299041	0.889	0.188	-0.0942	0.0942
CAPN3	P20807	0.0309034	0.611	-0.737	0.368	-0.368
CAPNS1	P04632	0.956301	0.938	0.00848	-0.00424	0.00424
CAPNS2	Q96L46	0.236513	0.876	-1.87	0.936	-0.936
CAPRIN1	Q14444	0.721588	0.928	-0.0391	0.0196	-0.0196
CAPZA1	P52907	0.118402	0.821	0.384	-0.192	0.192
CAPZB	P47756	0.864829	0.934	0.0226	-0.0113	0.0113
CARHSP1	Q9Y2V2	0.456417	0.91	0.169	-0.0845	0.0845
CARM1	Q86X55	0.494911	0.913	-0.0817	0.0409	-0.0409
CARS	P49589	0.0232701	0.542	-0.446	0.223	-0.223
CAST	P20810	0.00637592	0.193	0.545	-0.273	0.273
CAV1	Q03135	0.0213846	0.519	-1.47	0.734	-0.734
CBLC	Q9ULV8	0.00410892	0.11	1.89	-0.946	0.946
CBLN4	Q9NTU7	0.242896	0.877	-1.43	0.715	-0.715
CBX3	Q13185	0.0903654	0.793	0.246	-0.123	0.123
CCAR2	Q8N163	0.497436	0.914	-0.0872	0.0436	-0.0436
CCDC124	Q96CT7	0.690391	0.926	0.389	-0.194	0.194
CCDC40	Q4G0X9	0.445101	0.909	0.304	-0.152	0.152
CCDC47	Q96A33	0.180765	0.857	0.263	-0.132	0.132
CCDC58	Q4VC31	0.575741	0.919	0.118	-0.0592	0.0592
CCNJ	Q5T5M9	0.0240388	0.55	0.761	-0.381	0.381
CCT2	P78371	0.00675686	0.205	0.438	-0.219	0.219
CCT3	P49368	0.686345	0.926	-0.0357	0.0179	-0.0179
CCT4	P50991	0.95985	0.938	-0.0054	0.0027	-0.0027
CCT5	P48643	0.332067	0.895	0.138	-0.069	0.069
CCT6A	P40227	0.117189	0.82	-0.174	0.0871	-0.0871
CCT7	Q99832	0.297289	0.889	-0.155	0.0775	-0.0775
CCT8	P50990	0.0280035	0.588	0.427	-0.213	0.213
CD44	P16070	0.303789	0.89	0.203	-0.101	0.101
CDC37	Q16543	0.718637	0.928	-0.0953	0.0476	-0.0476
CDC42	P60953	0.152762	0.844	-0.231	0.115	-0.115
CDC6	Q99741	0.525006	0.916	0.768	-0.384	0.384
CDC73	Q6P1J9	0.978376	0.938	0.0064	-0.0032	0.0032
CDH1	P12830	0.211097	0.868	0.376	-0.188	0.188
CDH24	Q86UP0	0.0669873	0.754	-0.989	0.494	-0.494
CDK1	P06493	0.0117433	0.349	-0.469	0.235	-0.235
CDK5RAP3	Q96JB5	0.894021	0.935	0.0432	-0.0216	0.0216
CDK6	Q00534	0.23885	0.876	1.01	-0.503	0.503
CDV3	Q9UKY7	0.0115055	0.344	-0.46	0.23	-0.23
CEP290	O15078	0.076956	0.773	0.744	-0.372	0.372
CFL1	P23528	0.0313066	0.614	-0.626	0.313	-0.313
CHGB	P05060	0.338279	0.896	-1.12	0.558	-0.558
CHMP1A	Q9HD42	0.287786	0.887	0.32	-0.16	0.16
CHMP4B	Q9H444	0.130617	0.831	-0.253	0.127	-0.127
CHORDC1	Q9UHD1	0.943758	0.937	0.027	-0.0135	0.0135
CHP1	Q99653	0.222869	0.872	0.26	-0.13	0.13
CIAPIN1	Q6FI81	0.0388051	0.66	0.345	-0.173	0.173
CISD1	Q9NZ45	0.145523	0.84	-2.75	1.38	-1.38
CKAP4	Q07065	0.24026	0.877	0.113	-0.0565	0.0565
CKMT1A	P12532	0.577317	0.92	0.0766	-0.0383	0.0383
CLCA2	Q9UQC9	0.317285	0.893	1.8	-0.902	0.902
CLIC1	O00299	0.0867635	0.788	0.246	-0.123	0.123
CLIC4	Q9Y696	0.586282	0.92	-0.149	0.0744	-0.0744
CLINT1	Q14677	0.713153	0.927	-0.116	0.0582	-0.0582
CLNS1A	P54105	0.672716	0.925	-0.0407	0.0204	-0.0204
CLTB	P09497	0.369673	0.9	0.301	-0.151	0.151
CLTC	Q00610	0.387161	0.902	0.148	-0.0738	0.0738
CLUH	O75153	0.187875	0.86	-0.421	0.211	-0.211
CMPK1	P30085	0.268418	0.883	0.138	-0.0692	0.0692
CNDP2	Q96KP4	0.7308	0.928	0.0976	-0.0488	0.0488
CNN2	Q99439	0.749835	0.929	-0.0429	0.0215	-0.0215
CNN3	Q15417	0.0846779	0.785	-0.241	0.121	-0.121
CNOT1	A5YKK6	0.51679	0.915	1.37	-0.687	0.687
CNP	P09543	0.160854	0.848	1.35	-0.675	0.675
CNPY2	Q9Y2B0	0.344748	0.897	0.868	-0.434	0.434
COASY	Q13057	0.775883	0.93	0.0424	-0.0212	0.0212
COG3	Q96JB2	0.838819	0.933	0.149	-0.0744	0.0744
COG7	P83436	0.0143393	0.405	-0.738	0.369	-0.369
COL17A1	Q9UMD9	0.621455	0.922	-0.179	0.0896	-0.0896
COMMD9	Q9P000	0.0329555	0.626	0.632	-0.316	0.316
COMT	P21964	0.388245	0.903	-0.0907	0.0454	-0.0454
COPA	P53621	0.185441	0.859	-0.221	0.111	-0.111
COPB1	P53618	0.377956	0.901	0.0955	-0.0478	0.0478
COPB2	P35606	0.0454146	0.691	0.248	-0.124	0.124
COPE	O14579	0.638306	0.923	-0.0687	0.0343	-0.0343
COPG1	Q9Y678	0.721304	0.928	-0.0766	0.0383	-0.0383
COPS2	P61201	0.584331	0.92	0.0848	-0.0424	0.0424
COPS3	Q9UNS2	0.0118672	0.352	-0.842	0.421	-0.421
COPS4	Q9BT78	0.543028	0.917	-0.236	0.118	-0.118
COPS7A	Q9UBW8	0.285176	0.887	-2.58	1.29	-1.29
COPS8	Q99627	0.384908	0.902	0.343	-0.171	0.171
COPZ1	P61923	0.056334	0.728	0.316	-0.158	0.158
CORO1B	Q9BR76	0.0811101	0.779	0.898	-0.449	0.449
CORO1C	Q9ULV4	0.272175	0.884	0.24	-0.12	0.12
CORO7	P57737	0.152586	0.844	0.217	-0.108	0.108
COTL1	Q14019	0.221551	0.871	0.238	-0.119	0.119
COX17	Q14061	0.0135946	0.39	-0.714	0.357	-0.357
COX4I1	P13073	0.836479	0.933	-0.0471	0.0236	-0.0236
COX5A	P20674	0.193883	0.862	0.192	-0.0959	0.0959
COX5B	P10606	0.514849	0.915	0.433	-0.216	0.216
CPA5	Q8WXQ8	0.999517	0.939	0.00103	-0.000513	0.000513
CPD	O75976	0.189659	0.861	-0.517	0.259	-0.259
CPNE1	Q99829	0.27184	0.884	-0.122	0.0608	-0.0608
CPNE3	O75131	0.0294429	0.6	0.562	-0.281	0.281
CPOX	P36551	0.428114	0.907	-0.201	0.101	-0.101
CPSF6	Q16630	0.480748	0.912	0.121	-0.0603	0.0603
CPSF7	Q8N684	0.11737	0.821	-0.299	0.15	-0.15
CPT2	P23786	0.0650391	0.75	0.959	-0.479	0.479
CRK	P46108	0.355515	0.898	0.182	-0.0911	0.0911
CRKL	P46109	0.665699	0.925	-0.108	0.054	-0.054
CROCC	Q5TZA2	0.0215789	0.522	-0.629	0.315	-0.315
CRY1	Q16526	0.199654	0.865	0.963	-0.481	0.481
CRYBG3	Q68DQ2	0.391558	0.903	-0.967	0.484	-0.484
CRYZ	Q08257	0.928046	0.937	0.0321	-0.0161	0.0161
CS	O75390	0.00887627	0.272	-0.406	0.203	-0.203
CSDE1	O75534	0.256691	0.881	-0.118	0.0588	-0.0588
CSE1L	P55060	0.0335547	0.63	0.266	-0.133	0.133
CSK	P41240	0.287292	0.887	0.547	-0.273	0.273
CSMD2	Q7Z408	0.00421564	0.114	-0.712	0.356	-0.356
CSNK1A1	P48729	0.744444	0.929	0.238	-0.119	0.119
CSNK1E	P49674	0.127577	0.829	-1.58	0.792	-0.792
CSNK2A1	P68400	0.174512	0.855	0.493	-0.246	0.246
CSNK2B	P67870	0.0603448	0.738	-0.439	0.22	-0.22
CSRP1	P21291	0.10623	0.81	-0.353	0.177	-0.177
CSTB	P04080	0.0641889	0.748	-0.287	0.143	-0.143
CSTF1	Q05048	0.178236	0.856	-0.799	0.399	-0.399
CSTF2	P33240	0.035895	0.644	0.3	-0.15	0.15
CTNNA1	P35221	0.0496042	0.706	0.262	-0.131	0.131
CTNNA2	P26232	0.285615	0.887	0.695	-0.348	0.348
CTNNB1	P35222	0.889039	0.935	-0.0169	0.00843	-0.00843
CTNND1	O60716	0.471139	0.911	0.138	-0.0689	0.0689
CTPS1	P17812	0.465264	0.911	-0.126	0.0631	-0.0631
CTSB	P07858	0.234905	0.875	-0.576	0.288	-0.288
CTSD	P07339	0.291619	0.888	-0.158	0.0792	-0.0792
CTTN	Q14247	0.822689	0.933	-0.0973	0.0487	-0.0487
CUL3	Q13618	0.542689	0.917	-0.157	0.0786	-0.0786
CX3CL1	P78423	0.287506	0.887	-0.197	0.0986	-0.0986
CYB5B	O43169	0.0553794	0.725	-0.347	0.173	-0.173
CYB5R3	P00387	0.333295	0.895	-0.571	0.286	-0.286
CYC1	P08574	0.0166591	0.449	-1.55	0.775	-0.775
CYP2F1	P24903	0.17483	0.855	1.56	-0.778	0.778
CYP4A11	Q02928	0.0133563	0.385	0.563	-0.282	0.282
CYR61	O00622	0.0735516	0.767	-0.36	0.18	-0.18
DAD1	P61803	0.00810407	0.249	0.419	-0.209	0.209
DARS	P14868	0.0212322	0.517	0.425	-0.212	0.212
DARS2	Q6PI48	0.603602	0.921	0.0821	-0.041	0.041
DAZAP1	Q96EP5	0.0729405	0.766	-1.07	0.537	-0.537
DBI	P07108	0.0241558	0.551	0.868	-0.434	0.434
DBNL	Q9UJU6	0.748599	0.929	0.044	-0.022	0.022
DCBLD2	Q96PD2	0.663809	0.925	0.146	-0.0729	0.0729
DCTN1	Q14203	0.769175	0.93	-0.0296	0.0148	-0.0148
DCTN2	Q13561	0.115438	0.819	0.842	-0.421	0.421
DCTPP1	Q9H773	0.335992	0.895	-0.53	0.265	-0.265
DCUN1D1	Q96GG9	0.383316	0.902	0.668	-0.334	0.334
DDAH1	O94760	0.0187636	0.483	-0.377	0.189	-0.189
DDB1	Q16531	0.0140527	0.399	-0.555	0.278	-0.278
DDOST	P39656	0.13779	0.835	0.211	-0.105	0.105
DDRGK1	Q96HY6	0.340559	0.896	1.15	-0.576	0.576
DDX1	Q92499	0.0827184	0.782	-0.24	0.12	-0.12
DDX18	Q9NVP1	0.0729722	0.766	0.24	-0.12	0.12
DDX19A	Q9NUU7	0.91976	0.936	-0.0101	0.00506	-0.00506
DDX20	Q9UHI6	0.114004	0.818	-0.204	0.102	-0.102
DDX39A	O00148	0.148072	0.842	0.704	-0.352	0.352
DDX39B	Q13838	0.188293	0.86	0.131	-0.0655	0.0655
DDX3X	O00571	0.25895	0.881	-0.128	0.0641	-0.0641
DDX5	P17844	0.852648	0.934	0.0333	-0.0166	0.0166
DDX6	P26196	0.968092	0.938	0.00832	-0.00416	0.00416
DECR1	Q16698	0.383015	0.902	0.358	-0.179	0.179
DEK	P35659	0.0332784	0.628	1.65	-0.825	0.825
DENR	O43583	0.257996	0.881	0.263	-0.132	0.132
DFFA	O00273	0.0278409	0.587	0.434	-0.217	0.217
DFNA5	O60443	0.475489	0.912	-0.127	0.0637	-0.0637
DHRS7	Q9Y394	0.0536742	0.72	0.41	-0.205	0.205
DHX15	O43143	0.138304	0.836	0.872	-0.436	0.436
DHX57	Q6P158	0.405899	0.905	-0.214	0.107	-0.107
DHX9	Q08211	0.389026	0.903	0.263	-0.131	0.131
DIABLO	Q9NR28	0.0907851	0.793	1.3	-0.649	0.649
DIAPH1	O60610	0.804784	0.932	0.0391	-0.0196	0.0196
DIS3	Q9Y2L1	0.101881	0.806	-0.274	0.137	-0.137
DLST	P36957	0.0360391	0.645	0.394	-0.197	0.197
DNAAF5	Q86Y56	0.396116	0.904	-0.335	0.167	-0.167
DNAH12	Q6ZR08	0.828477	0.933	-0.0452	0.0226	-0.0226
DNAH3	Q8TD57	0.625198	0.923	0.283	-0.141	0.141
DNAH7	Q8WXX0	0.693545	0.926	0.244	-0.122	0.122
DNAJA1	P31689	0.658392	0.925	-0.1	0.0501	-0.0501
DNAJA2	O60884	0.147082	0.841	-0.194	0.0968	-0.0968
DNAJB1	P25685	0.209105	0.868	0.36	-0.18	0.18
DNAJB11	Q9UBS4	0.937608	0.937	0.0185	-0.00927	0.00927
DNAJC7	Q99615	0.66196	0.925	-0.114	0.0569	-0.0569
DNAJC9	Q8WXX5	0.450084	0.909	-0.418	0.209	-0.209
DNM1L	O00429	0.256811	0.881	0.164	-0.0819	0.0819
DNM2	P50570	0.568348	0.919	0.0813	-0.0407	0.0407
DPH5	Q9H2P9	0.738882	0.929	0.0606	-0.0303	0.0303
DPP3	Q9NY33	0.786979	0.931	-0.0408	0.0204	-0.0204
DPP9	Q86TI2	0.341025	0.896	0.194	-0.0969	0.0969
DPY30	Q9C005	0.161201	0.849	-0.189	0.0943	-0.0943
DPYD	Q12882	0.115273	0.819	0.744	-0.372	0.372
DR1	Q01658	0.0980497	0.802	0.378	-0.189	0.189
DRAP1	Q14919	0.806406	0.932	-0.0607	0.0303	-0.0303
DRG1	Q9Y295	0.391325	0.903	0.665	-0.332	0.332
DRG2	P55039	0.523151	0.916	1.02	-0.511	0.511
DSP	P15924	0.192364	0.862	0.215	-0.108	0.108
DSTN	P60981	0.0107841	0.326	1.19	-0.595	0.595
DTX3L	Q8TDB6	0.114613	0.818	1.35	-0.673	0.673
DTYMK	P23919	0.264067	0.882	0.208	-0.104	0.104
DUSP1	P28562	0.85969	0.934	-0.067	0.0335	-0.0335
DUT	P33316	0.111648	0.816	-0.192	0.0961	-0.0961
DYM	Q7RTS9	0.17009	0.853	-0.673	0.337	-0.337
DYNC1H1	Q14204	0.213107	0.869	0.195	-0.0975	0.0975
DYNC1I2	Q13409	0.0512505	0.712	-0.262	0.131	-0.131
DYNC1LI2	O43237	0.134733	0.833	0.993	-0.496	0.496
DYNLL1	P63167	0.0156706	0.432	0.434	-0.217	0.217
DYNLL2	Q96FJ2	0.838589	0.933	0.0837	-0.0418	0.0418
DYNLRB1;DYNLRB2	Q9NP97;Q8TF09	0.00469143	0.132	0.485	-0.243	0.243
DYNLT1	P63172	0.512093	0.915	-0.321	0.161	-0.161
ECH1	Q13011	0.963883	0.938	-0.00721	0.00361	-0.00361
ECHS1	P30084	0.242018	0.877	0.173	-0.0865	0.0865
ECM29	Q5VYK3	0.0489156	0.704	0.298	-0.149	0.149
EDC3	Q96F86	0.00308571	0.0698	1.87	-0.937	0.937
EDC4	Q6P2E9	0.218596	0.871	-0.86	0.43	-0.43
EDF1	O60869	0.332317	0.895	-0.267	0.133	-0.133
EEF1A1;EEF1A1P5	P68104;Q5VTE0	0.619911	0.922	0.049	-0.0245	0.0245
EEF1B2	P24534	0.151656	0.844	0.163	-0.0817	0.0817
EEF1D	P29692	0.153247	0.845	-0.401	0.201	-0.201
EEF1E1	O43324	0.82835	0.933	0.127	-0.0637	0.0637
EEF1G	P26641	0.620093	0.922	-0.0466	0.0233	-0.0233
EEF2	P13639	0.325445	0.894	-0.106	0.0529	-0.0529
EFHD2	Q96C19	0.00586135	0.175	0.561	-0.281	0.281
EFTUD2	Q15029	0.0589772	0.735	0.302	-0.151	0.151
EGFR	P00533	0.722663	0.928	0.0802	-0.0401	0.0401
EHD1	Q9H4M9	0.857154	0.934	0.02	-0.01	0.01
EHD3	Q9NZN3	0.052903	0.717	-0.216	0.108	-0.108
EHD4	Q9H223	0.838955	0.933	0.0189	-0.00945	0.00945
EIF1	P41567	0.0272696	0.582	0.492	-0.246	0.246
EIF1AY	O14602	0.0332482	0.628	0.384	-0.192	0.192
EIF2A	Q9BY44	0.56382	0.919	0.0661	-0.033	0.033
EIF2AK2	P19525	0.0929592	0.796	0.739	-0.369	0.369
EIF2B1	Q14232	0.0471087	0.697	0.355	-0.177	0.177
EIF2S1	P05198	0.0483418	0.702	-0.239	0.12	-0.12
EIF2S2	P20042	0.00186332	0.0256	-0.637	0.319	-0.319
EIF2S3	P41091	0.486717	0.913	-0.0985	0.0492	-0.0492
EIF3A	Q14152	0.326022	0.894	0.102	-0.0508	0.0508
EIF3B	P55884	0.241036	0.877	-0.149	0.0744	-0.0744
EIF3C;EIF3CL	Q99613;B5ME19	0.460267	0.91	0.0879	-0.044	0.044
EIF3D	O15371	0.735658	0.929	-0.0329	0.0165	-0.0165
EIF3E	P60228	0.241462	0.877	0.148	-0.0738	0.0738
EIF3F	O00303	0.292232	0.888	0.137	-0.0687	0.0687
EIF3G	O75821	0.00574749	0.171	-0.627	0.313	-0.313
EIF3H	O15372	0.472341	0.911	-0.0953	0.0476	-0.0476
EIF3I	Q13347	0.274347	0.885	-0.155	0.0776	-0.0776
EIF3J	O75822	0.0135185	0.388	0.628	-0.314	0.314
EIF3K	Q9UBQ5	0.0305935	0.609	0.921	-0.46	0.46
EIF3L	Q9Y262	0.0629424	0.745	0.3	-0.15	0.15
EIF3M	Q7L2H7	0.343569	0.897	-0.261	0.131	-0.131
EIF4A1	P60842	0.370119	0.9	0.153	-0.0767	0.0767
EIF4A2	Q14240	0.865393	0.934	-0.0468	0.0234	-0.0234
EIF4A3	P38919	0.0417736	0.675	0.282	-0.141	0.141
EIF4B	P23588	0.204617	0.866	0.185	-0.0925	0.0925
EIF4G1	Q04637	0.417033	0.906	0.0873	-0.0436	0.0436
EIF4G2	P78344	0.677421	0.926	-0.121	0.0603	-0.0603
EIF4H	Q15056	0.0393291	0.663	-0.339	0.169	-0.169
EIF5	P55010	0.722339	0.928	0.0565	-0.0283	0.0283
EIF5A	P63241	0.26895	0.883	0.123	-0.0615	0.0615
EIF5B	O60841	0.278857	0.885	1.07	-0.533	0.533
EIF6	P56537	0.358672	0.899	0.102	-0.0511	0.0511
ELOVL1	Q9BW60	0.0629346	0.745	-0.674	0.337	-0.337
EMC7	Q9NPA0	0.505849	0.914	0.16	-0.0801	0.0801
EMD	P50402	0.318731	0.893	-0.186	0.0932	-0.0932
EMG1	Q92979	0.144905	0.84	-0.309	0.154	-0.154
ENO1	P06733	0.000412266	0.000297	0.778	-0.389	0.389
ENOPH1	Q9UHY7	0.0933999	0.796	-0.665	0.333	-0.333
EOMES	O95936	0.402819	0.904	-0.83	0.415	-0.415
EPCAM	P16422	0.016991	0.455	-0.747	0.373	-0.373
EPG5	Q9HCE0	0.149133	0.842	1.43	-0.715	0.715
EPHA2	P29317	0.166715	0.851	-0.328	0.164	-0.164
EPRS	P07814	0.0936489	0.797	0.237	-0.118	0.118
ERAL1	O75616	0.00497108	0.143	-3.39	1.69	-1.69
ERH	P84090	0.00491657	0.14	-0.41	0.205	-0.205
ERICH3	Q5RHP9	0.380484	0.902	-1.15	0.573	-0.573
ERO1L	Q96HE7	0.862378	0.934	-0.0217	0.0109	-0.0109
ERP29	P30040	0.0507534	0.71	0.289	-0.145	0.145
ERP44	Q9BS26	0.538483	0.917	-0.0671	0.0335	-0.0335
ERV3-1	Q14264	0.70314	0.927	-0.531	0.265	-0.265
ERVFC1	P60507	0.0665325	0.753	2.2	-1.1	1.1
ESD	P10768	0.27082	0.884	-0.129	0.0643	-0.0643
ESF1	Q9H501	0.442283	0.909	-1.52	0.761	-0.761
ESYT1	Q9BSJ8	0.0336946	0.631	0.341	-0.171	0.171
ETF1	P62495	0.318305	0.893	0.171	-0.0857	0.0857
ETFA	P13804	0.028474	0.592	0.371	-0.186	0.186
ETFB	P38117	0.891545	0.935	-0.0206	0.0103	-0.0103
EVC	P57679	0.273028	0.884	0.549	-0.275	0.275
EVC2	Q86UK5	0.208773	0.868	0.241	-0.12	0.12
EXD1	Q8NHP7	0.176823	0.856	-2.29	1.14	-1.14
EXOSC2	Q13868	0.322338	0.893	0.974	-0.487	0.487
EXOSC6	Q5RKV6	0.733765	0.929	-0.0405	0.0202	-0.0202
EZR	P15311	0.822247	0.933	-0.0369	0.0185	-0.0185
F11R	Q9Y624	0.731305	0.928	-0.0855	0.0428	-0.0428
F3	P13726	0.0374981	0.653	0.55	-0.275	0.275
FADS3	Q9Y5Q0	0.653903	0.924	0.0803	-0.0401	0.0401
FAF2	Q96CS3	0.395133	0.903	-0.17	0.0849	-0.0849
FAM129B	Q96TA1	0.00649473	0.197	0.47	-0.235	0.235
FAM216B	Q8N7L0	0.172221	0.854	-1.19	0.596	-0.596
FAM228B	P0C875	0.0516687	0.713	1.5	-0.748	0.748
FAM3C	Q92520	0.32934	0.894	-2.54	1.27	-1.27
FAM49B	Q9NUQ9	0.222876	0.872	0.707	-0.354	0.354
FAM92A1	A1XBS5	0.227076	0.873	0.831	-0.416	0.416
FAM98B	Q52LJ0	0.540469	0.917	0.141	-0.0704	0.0704
FARSA	Q9Y285	0.611583	0.922	-0.0523	0.0262	-0.0262
FARSB	Q9NSD9	0.831843	0.933	-0.0194	0.00968	-0.00968
FASN	P49327	0.287961	0.887	0.148	-0.0738	0.0738
FAT4	Q6V0I7	0.837489	0.933	0.0457	-0.0229	0.0229
FBXL16	Q8N461	0.920269	0.936	-0.0561	0.028	-0.028
FBXL2	Q9UKC9	0.35649	0.898	-0.754	0.377	-0.377
FCN1	O00602	0.827944	0.933	0.0323	-0.0161	0.0161
FDPS	P14324	0.16171	0.849	-0.264	0.132	-0.132
FDXR	P22570	0.730656	0.928	0.17	-0.0848	0.0848
FEN1	P39748	0.893646	0.935	0.0363	-0.0182	0.0182
FER1L6	Q2WGJ9	0.169746	0.853	0.336	-0.168	0.168
FERMT1	Q9BQL6	0.0705267	0.761	-1.15	0.577	-0.577
FH	P07954	0.0816457	0.78	-0.291	0.146	-0.146
FHOD1	Q9Y613	0.223878	0.872	-0.318	0.159	-0.159
FIS1	Q9Y3D6	0.151923	0.844	-0.408	0.204	-0.204
FKBP10	Q96AY3	0.195261	0.863	0.278	-0.139	0.139
FKBP1A	P62942	0.401909	0.904	0.251	-0.125	0.125
FKBP3	Q00688	0.79759	0.931	0.0333	-0.0166	0.0166
FKBP4	Q02790	0.133735	0.833	0.31	-0.155	0.155
FLII	Q13045	0.644947	0.924	0.0637	-0.0319	0.0319
FLNA	P21333	0.0206097	0.509	0.406	-0.203	0.203
FLNB	O75369	0.0195297	0.495	0.559	-0.28	0.28
FNDC3B	Q53EP0	0.720869	0.928	0.232	-0.116	0.116
FNTA	P49354	0.79481	0.931	-0.153	0.0764	-0.0764
FOXK1	P85037	0.444664	0.909	0.812	-0.406	0.406
FRMPD4	Q14CM0	0.0949759	0.798	1.96	-0.978	0.978
FSCN1	Q16658	0.34329	0.897	0.127	-0.0634	0.0634
FUBP1	Q96AE4	0.0114559	0.342	0.332	-0.166	0.166
FUBP3	Q96I24	0.179616	0.857	0.724	-0.362	0.362
FUS	P35637	0.00904362	0.277	1.05	-0.527	0.527
FUT11	Q495W5	0.356344	0.898	-1.78	0.892	-0.892
FXR1	P51114	0.790528	0.931	-0.0538	0.0269	-0.0269
G3BP1	Q13283	0.0661435	0.752	0.298	-0.149	0.149
G3BP2	Q9UN86	0.562993	0.919	0.29	-0.145	0.145
G6PD	P11413	0.192673	0.862	0.136	-0.0682	0.0682
GALE	Q14376	0.2779	0.885	-0.358	0.179	-0.179
GANAB	Q14697	0.817944	0.932	0.0286	-0.0143	0.0143
GAPDH	P04406	0.215157	0.87	0.966	-0.483	0.483
GARS	P41250	0.226015	0.873	0.133	-0.0664	0.0664
GART	P22102	0.243696	0.878	0.204	-0.102	0.102
GBE1	Q04446	0.434627	0.908	0.126	-0.0632	0.0632
GBF1	Q92538	0.912225	0.936	-0.0238	0.0119	-0.0119
GC	P02774	0.000143027	1.49e-06	-0.931	0.466	-0.466
GCN1L1	Q92616	0.0899289	0.792	0.558	-0.279	0.279
GDI1	P31150	0.238734	0.876	0.24	-0.12	0.12
GDI2	P50395	0.387093	0.902	-0.099	0.0495	-0.0495
GEMIN4	P57678	0.941691	0.937	0.0173	-0.00866	0.00866
GEMIN5	Q8TEQ6	0.956345	0.938	-0.0118	0.00592	-0.00592
GFM1	Q96RP9	0.728178	0.928	-0.0565	0.0282	-0.0282
GFPT1	Q06210	0.437092	0.908	-0.122	0.0609	-0.0609
GGA3	Q9NZ52	0.263266	0.882	-0.305	0.152	-0.152
GGCT	O75223	0.166377	0.851	0.515	-0.257	0.257
GID8	Q9NWU2	0.00747921	0.229	-1	0.5	-0.5
GIN1	Q9NXP7	0.0676448	0.755	-1.66	0.832	-0.832
GLG1	Q92896	0.0553582	0.725	2.97	-1.48	1.48
GLI2	P10070	0.158134	0.847	-0.235	0.117	-0.117
GLMN	Q92990	0.106859	0.811	-0.51	0.255	-0.255
GLO1	Q04760	0.939943	0.937	-0.0222	0.0111	-0.0111
GLOD4	Q9HC38	0.137486	0.835	-0.339	0.17	-0.17
GLRX3	O76003	0.208578	0.867	-0.183	0.0914	-0.0914
GLUD1	P00367	0.258967	0.881	-0.262	0.131	-0.131
GLYR1	Q49A26	0.40335	0.904	1.26	-0.628	0.628
GM2A	P17900	0.158136	0.847	0.195	-0.0974	0.0974
GMFB	P60983	0.0213743	0.519	1.36	-0.681	0.681
GMPPB	Q9Y5P6	0.364469	0.9	-0.1	0.0501	-0.0501
GMPS	P49915	0.112953	0.817	0.167	-0.0835	0.0835
GNB1	P62873	0.0513184	0.712	-0.361	0.181	-0.181
GNB2	P62879	0.267817	0.883	-0.178	0.0892	-0.0892
GNB2L1	P63244	0.0781496	0.775	0.193	-0.0965	0.0965
GNPDA1	P46926	0.11304	0.817	1.1	-0.548	0.548
GNPNAT1	Q96EK6	0.186304	0.86	0.142	-0.0712	0.0712
GOLGA6L2	Q8N9W4	0.058021	0.732	-3.55	1.77	-1.77
GOSR1	O95249	0.895136	0.935	-0.0389	0.0194	-0.0194
GOT1	P17174	0.00111812	0.00792	0.696	-0.348	0.348
GOT2	P00505	0.0484986	0.703	-0.503	0.251	-0.251
GPAA1	O43292	0.00626581	0.189	-1.45	0.726	-0.726
GPD2	P43304	0.0577877	0.732	-0.738	0.369	-0.369
GPI	P06744	0.62165	0.922	0.116	-0.0579	0.0579
GPR98	Q8WXG9	0.414112	0.906	0.626	-0.313	0.313
GRB2	P62993	0.00674898	0.205	0.687	-0.343	0.343
GRHPR	Q9UBQ7	0.243184	0.877	1.17	-0.584	0.584
GRIA2	P42262	0.126493	0.828	-0.513	0.256	-0.256
GRPEL1	Q9HAV7	0.0577804	0.732	0.262	-0.131	0.131
GRSF1	Q12849	0.330417	0.895	0.151	-0.0757	0.0757
GSN	P06396	0.656505	0.924	-0.0521	0.0261	-0.0261
GSPT1	P15170	0.194288	0.863	-0.281	0.14	-0.14
GSS	P48637	0.165303	0.851	-0.161	0.0803	-0.0803
GSTK1	Q9Y2Q3	0.0442931	0.686	-0.406	0.203	-0.203
GSTO1	P78417	0.0472167	0.698	-0.292	0.146	-0.146
GSTP1	P09211	0.323524	0.894	-0.0918	0.0459	-0.0459
GSTZ1	O43708	0.500848	0.914	0.327	-0.163	0.163
GTF2F2	P13984	0.0543112	0.722	1.64	-0.819	0.819
GYG1	P46976	0.701492	0.927	-0.0646	0.0323	-0.0323
H3F3A	P84243	0.155668	0.846	-0.337	0.168	-0.168
HACD3	Q9P035	0.217903	0.87	-0.143	0.0717	-0.0717
HADH	Q16836	0.300054	0.89	0.149	-0.0747	0.0747
HADHA	P40939	0.318303	0.893	0.142	-0.0712	0.0712
HADHB	P55084	0.0345055	0.636	-0.262	0.131	-0.131
HARS	P12081	0.33753	0.896	0.129	-0.0644	0.0644
HAT1	O14929	0.859097	0.934	0.0303	-0.0152	0.0152
HBA1	P69905	0.0812365	0.78	-0.266	0.133	-0.133
HBD	P02042	0.0623937	0.743	0.616	-0.308	0.308
HCFC1	P51610	0.0335639	0.63	-0.708	0.354	-0.354
HDAC1	Q13547	0.705532	0.927	0.0877	-0.0439	0.0439
HDGF	P51858	0.0174256	0.462	0.368	-0.184	0.184
HDHD1	Q08623	0.253141	0.88	-0.351	0.175	-0.175
HDLBP	Q00341	0.118174	0.821	0.36	-0.18	0.18
HELZ2	Q9BYK8	0.139931	0.837	-2.42	1.21	-1.21
HEXB	P07686	0.42443	0.907	-0.164	0.0821	-0.0821
HGH1	Q9BTY7	0.175951	0.855	-0.294	0.147	-0.147
HID1	Q8IV36	0.187094	0.86	1.31	-0.655	0.655
HIGD1A	Q9Y241	0.12696	0.828	0.627	-0.313	0.313
HINT1	P49773	0.565026	0.919	0.117	-0.0587	0.0587
HIST1H1B	P16401	0.0985244	0.802	-0.297	0.149	-0.149
HIST1H1C	P16403	0.206873	0.867	-0.208	0.104	-0.104
HIST1H1E	P10412	0.000210513	1.34e-05	-0.866	0.433	-0.433
HIST1H2BC;H2BFS;HIST1H2BK;HIST1H2BM;HIST1H2BN;HIST1H2BH;HIST2H2BF;HIST1H2BD;HIST1H2BL;HIST2H2BE;HIST1H2BJ	P62807;P57053;O60814;Q99879;Q99877;Q93079;Q5QNW6;P58876;Q99880;Q16778;P06899;P33778;P23527;Q8N257;Q96A08	0.000540073	0.0008	-0.99	0.495	-0.495
HIST1H4A	P62805	0.0103769	0.315	-0.77	0.385	-0.385
HK1	P19367	0.294484	0.889	0.278	-0.139	0.139
HK2	P52789	0.336998	0.896	0.126	-0.0632	0.0632
HLA-A	P04439	0.0942162	0.797	0.602	-0.301	0.301
HLA-B	P01889	0.309399	0.891	-0.3	0.15	-0.15
HLA-DOB	P13765	0.841284	0.933	-0.0563	0.0282	-0.0282
HLA-H	P01893	0.382089	0.902	-0.257	0.129	-0.129
HM13	Q8TCT9	0.986177	0.939	0.00872	-0.00436	0.00436
HMGA1	P17096	0.633979	0.923	0.634	-0.317	0.317
HMGB1	P09429	0.00427106	0.116	-0.656	0.328	-0.328
HMGB2	P26583	0.107349	0.812	0.201	-0.1	0.1
HMGB3	O15347	0.873581	0.935	-0.0389	0.0194	-0.0194
HMGCL	P35914	0.966288	0.938	0.00716	-0.00358	0.00358
HMGCS1	Q01581	0.578333	0.92	-0.0921	0.046	-0.046
HMOX2	P30519	0.00815397	0.25	-0.438	0.219	-0.219
HN1	Q9UK76	0.455485	0.91	-0.192	0.0958	-0.0958
HN1L	Q9H910	0.134612	0.833	0.293	-0.147	0.147
HNRNPA0	Q13151	0.712841	0.927	0.153	-0.0767	0.0767
HNRNPA1	P09651	0.0205031	0.508	-0.647	0.323	-0.323
HNRNPA2B1	P22626	0.92481	0.937	0.025	-0.0125	0.0125
HNRNPA3	P51991	0.0249209	0.559	-0.347	0.174	-0.174
HNRNPAB	Q99729	0.0931892	0.796	0.72	-0.36	0.36
HNRNPC	P07910	0.549231	0.918	0.0687	-0.0344	0.0344
HNRNPF	P52597	0.991213	0.939	0.00135	-0.000673	0.000673
HNRNPH1	P31943	0.00576643	0.171	0.409	-0.205	0.205
HNRNPH2	P55795	0.125248	0.827	0.487	-0.244	0.244
HNRNPH3	P31942	0.334952	0.895	0.4	-0.2	0.2
HNRNPK	P61978	0.0246479	0.557	0.465	-0.232	0.232
HNRNPL	P14866	0.004013	0.106	-0.457	0.229	-0.229
HNRNPM	P52272	0.343026	0.897	-0.127	0.0636	-0.0636
HNRNPR	O43390	0.0169628	0.455	1.52	-0.762	0.762
HNRNPU	Q00839	0.341602	0.896	-0.138	0.0688	-0.0688
HPRT1	P00492	0.0223315	0.531	0.368	-0.184	0.184
HSBP1	O75506	0.0278383	0.587	0.705	-0.352	0.352
HSD17B10	Q99714	0.0181173	0.473	0.32	-0.16	0.16
HSD17B12	Q53GQ0	0.872303	0.935	-0.0265	0.0133	-0.0133
HSD17B4	P51659	0.250505	0.879	0.91	-0.455	0.455
HSDL2	Q6YN16	0.450816	0.909	0.874	-0.437	0.437
HSP90AA1	P07900	0.90195	0.936	0.0123	-0.00615	0.00615
HSP90AB1	P08238	0.178713	0.857	0.465	-0.233	0.233
HSP90AB2P	Q58FF8	0.342663	0.896	0.159	-0.0796	0.0796
HSP90AB3P	Q58FF7	0.755916	0.93	0.152	-0.0759	0.0759
HSP90B1	P14625	0.20433	0.866	-0.129	0.0647	-0.0647
HSPA14	Q0VDF9	0.143313	0.839	-0.52	0.26	-0.26
HSPA1B;HSPA1A	P0DMV9;P0DMV8	0.434997	0.908	0.68	-0.34	0.34
HSPA4	P34932	0.655727	0.924	0.0415	-0.0208	0.0208
HSPA4L	O95757	0.135926	0.834	0.377	-0.188	0.188
HSPA5	P11021	0.0874331	0.789	0.277	-0.138	0.138
HSPA8	P11142	0.0783983	0.775	0.988	-0.494	0.494
HSPA9	P38646	0.09126	0.794	0.18	-0.09	0.09
HSPB1	P04792	0.370342	0.9	-0.0876	0.0438	-0.0438
HSPBP1	Q9NZL4	0.0855758	0.786	0.508	-0.254	0.254
HSPD1	P10809	0.646633	0.924	-0.064	0.032	-0.032
HSPE1	P61604	0.725211	0.928	0.1	-0.0502	0.0502
HSPH1	Q92598	0.0138921	0.396	0.351	-0.176	0.176
HUWE1	Q7Z6Z7	0.0686983	0.757	0.297	-0.149	0.149
HYOU1	Q9Y4L1	0.386995	0.902	0.0819	-0.041	0.041
IARS	P41252	0.0193634	0.492	0.306	-0.153	0.153
IDH1	O75874	0.394931	0.903	0.172	-0.0858	0.0858
IDH3A	P50213	0.353924	0.898	-0.122	0.0612	-0.0612
IFI16	Q16666	0.572034	0.919	0.523	-0.262	0.262
IFIT1	P09914	0.204883	0.866	-1.93	0.966	-0.966
IFIT2	P09913	0.396687	0.904	-0.898	0.449	-0.449
IGF2BP3	O00425	0.641908	0.924	0.315	-0.158	0.158
IGFALS	P35858	0.219871	0.871	-0.543	0.272	-0.272
IGHV3-74	A0A0B4J1X5	0.286433	0.887	1.14	-0.57	0.57
IL18	Q14116	0.0231904	0.541	1.05	-0.525	0.525
ILF2	Q12905	0.94167	0.937	-0.00807	0.00403	-0.00403
ILF3	Q12906	0.0783003	0.775	-0.295	0.148	-0.148
ILK	Q13418	0.057476	0.731	0.398	-0.199	0.199
IMPA1	P29218	0.0306073	0.609	0.796	-0.398	0.398
IMPDH1	P20839	0.0885841	0.79	0.236	-0.118	0.118
IMPDH2	P12268	0.154788	0.845	-0.251	0.125	-0.125
IPO4	Q8TEX9	0.87169	0.935	0.0226	-0.0113	0.0113
IPO5	O00410	0.230637	0.874	0.147	-0.0735	0.0735
IPO7	O95373	0.169404	0.852	0.306	-0.153	0.153
IPO9	Q96P70	0.827464	0.933	-0.0325	0.0163	-0.0163
IQGAP1	P46940	0.522334	0.916	0.0598	-0.0299	0.0299
IRF2BP2	Q7Z5L9	0.396921	0.904	1.7	-0.849	0.849
IRF6	O14896	0.365298	0.9	0.254	-0.127	0.127
ISG15	P05161	0.618377	0.922	-0.185	0.0927	-0.0927
IST1	P53990	0.310164	0.891	-0.358	0.179	-0.179
ITCH	Q96J02	0.600024	0.921	1.3	-0.649	0.649
ITGA2	P17301	0.0153626	0.426	0.629	-0.314	0.314
ITGA2B	P08514	0.23758	0.876	-3.02	1.51	-1.51
ITGA3	P26006	0.29464	0.889	-1.82	0.912	-0.912
ITGA6	P23229	0.350771	0.898	0.166	-0.0828	0.0828
ITGA8	P53708	0.707038	0.927	-0.139	0.0697	-0.0697
ITGB1	P05556	0.0140824	0.4	0.413	-0.206	0.206
ITGB4	P16144	0.855378	0.934	-0.021	0.0105	-0.0105
ITIH2	P19823	0.00253779	0.0485	-0.63	0.315	-0.315
ITIH6	Q6UXX5	0.663701	0.925	-0.0857	0.0429	-0.0429
ITPA	Q9BY32	0.279945	0.886	0.145	-0.0723	0.0723
IVD	P26440	0.108607	0.813	-0.756	0.378	-0.378
JUP	P14923	0.190585	0.861	-0.139	0.0693	-0.0693
KARS	Q15046	0.611109	0.922	-0.108	0.0542	-0.0542
KCNH6	Q9H252	0.340458	0.896	-1.25	0.623	-0.623
KCTD12	Q96CX2	0.0306305	0.609	-0.446	0.223	-0.223
KDM1B	Q8NB78	0.532705	0.916	-0.193	0.0966	-0.0966
KEL	P23276	0.117739	0.821	0.169	-0.0845	0.0845
KHDRBS1	Q07666	0.105526	0.81	-0.382	0.191	-0.191
KHSRP	Q92945	0.720281	0.928	-0.0425	0.0213	-0.0213
KIF5B	P33176	0.910444	0.936	-0.0225	0.0113	-0.0113
KLHL6	Q8WZ60	0.224039	0.872	-0.453	0.227	-0.227
KNG1	P01042	0.0197531	0.498	-1.81	0.906	-0.906
KPNA1	P52294	0.672068	0.925	0.0546	-0.0273	0.0273
KPNA2	P52292	0.858401	0.934	-0.0176	0.00878	-0.00878
KPNA3	O00505	0.201842	0.865	-0.608	0.304	-0.304
KPNA4	O00629	0.9967	0.939	0.000432	-0.000216	0.000216
KPNB1	Q14974	0.569646	0.919	-0.0973	0.0486	-0.0486
KRAS	P01116	0.280317	0.886	-0.182	0.0909	-0.0909
KRT14	P02533	0.931309	0.937	0.0144	-0.0072	0.0072
KRT17	Q04695	0.715377	0.928	0.0611	-0.0305	0.0305
KRT18	P05783	0.0424336	0.678	0.253	-0.126	0.126
KRT19	P08727	0.156819	0.846	0.166	-0.0828	0.0828
KRT2	P35908	0.23799	0.876	0.561	-0.281	0.281
KRT6A;KRT6C	P02538;P48668	0.0178483	0.469	1.02	-0.508	0.508
KRT7	P08729	0.095923	0.799	0.511	-0.255	0.255
KRT75	O95678	0.273939	0.884	-2.05	1.03	-1.03
KRT8	P05787	0.218412	0.871	0.168	-0.0839	0.0839
KSR2	Q6VAB6	0.0238213	0.548	0.379	-0.19	0.19
KTI12	Q96EK9	0.827672	0.933	0.236	-0.118	0.118
KTN1	Q86UP2	0.0810329	0.779	0.288	-0.144	0.144
KYNU	Q16719	0.2052	0.866	0.989	-0.494	0.494
LACC1	Q8IV20	0.242766	0.877	-0.922	0.461	-0.461
LACE1	Q8WV93	0.395206	0.903	0.468	-0.234	0.234
LAD1	O00515	0.523171	0.916	0.326	-0.163	0.163
LAGE3	Q14657	0.0448982	0.689	-0.519	0.259	-0.259
LAMB3	Q13751	0.0123085	0.362	0.394	-0.197	0.197
LAMC2	Q13753	0.0574968	0.731	-1.64	0.822	-0.822
LAMP1	P11279	0.487604	0.913	-0.196	0.0979	-0.0979
LAMP2	P13473	0.882684	0.935	-0.0627	0.0313	-0.0313
LAP3	P28838	0.40951	0.905	0.145	-0.0724	0.0724
LARP1	Q6PKG0	0.839128	0.933	0.0565	-0.0283	0.0283
LARP4	Q71RC2	0.0474999	0.699	0.32	-0.16	0.16
LARS	Q9P2J5	0.333472	0.895	-0.104	0.0518	-0.0518
LASP1	Q14847	0.916677	0.936	-0.0207	0.0103	-0.0103
LATS1	O95835	0.557244	0.918	-0.394	0.197	-0.197
LCP1	P13796	0.000462098	0.000456	0.882	-0.441	0.441
LDHA	P00338	0.296664	0.889	0.354	-0.177	0.177
LGALS1	P09382	0.192315	0.862	0.829	-0.414	0.414
LGALS3	P17931	0.209793	0.868	0.486	-0.243	0.243
LGALS3BP	Q08380	0.450595	0.909	0.876	-0.438	0.438
LIMA1	Q9UHB6	0.07569	0.771	0.34	-0.17	0.17
LINC00479	Q96M42	0.566709	0.919	1.12	-0.561	0.561
LMAN1	P49257	0.947789	0.937	0.0107	-0.00536	0.00536
LMAN2	Q12907	0.789174	0.931	0.0453	-0.0226	0.0226
LMF1	Q96S06	0.0370343	0.651	2.46	-1.23	1.23
LMNA	P02545	0.365229	0.9	0.335	-0.168	0.168
LMNB1	P20700	0.256047	0.881	0.407	-0.203	0.203
LMNB2	Q03252	0.51645	0.915	0.635	-0.317	0.317
LOXL1	Q08397	0.34089	0.896	-3.12	1.56	-1.56
LRP1B	Q9NZR2	0.687882	0.926	0.184	-0.0922	0.0922
LRP4	O75096	0.722764	0.928	0.107	-0.0535	0.0535
LRPPRC	P42704	0.836274	0.933	0.0187	-0.00933	0.00933
LRRC28	Q86X40	0.457811	0.91	0.242	-0.121	0.121
LRRC31	Q6UY01	0.0111616	0.335	0.961	-0.48	0.48
LRRC47	Q8N1G4	0.606052	0.921	-0.0837	0.0418	-0.0418
LRRC59	Q96AG4	0.909245	0.936	0.0412	-0.0206	0.0206
LRRC8E	Q6NSJ5	0.491403	0.913	-0.0894	0.0447	-0.0447
LRRFIP1	Q32MZ4	0.132804	0.832	-0.173	0.0864	-0.0864
LSM1	O15116	0.687933	0.926	-0.0922	0.0461	-0.0461
LSM12	Q3MHD2	0.229432	0.874	-0.341	0.171	-0.171
LSM2	Q9Y333	0.154841	0.845	1.06	-0.532	0.532
LSM3	P62310	0.0353747	0.641	0.487	-0.243	0.243
LSM4	Q9Y4Z0	0.0446249	0.687	1.15	-0.574	0.574
LSM5	Q9Y4Y9	0.999562	0.939	-0.000156	7.8e-05	-7.8e-05
LSM6	P62312	0.20979	0.868	-0.374	0.187	-0.187
LSM8	O95777	0.0292353	0.599	0.528	-0.264	0.264
LTA4H	P09960	0.132932	0.832	0.238	-0.119	0.119
LTF	P02788	0.655614	0.924	0.151	-0.0756	0.0756
LUC7L2	Q9Y383	0.0988782	0.803	-0.528	0.264	-0.264
LUM	P51884	0.313234	0.892	-0.82	0.41	-0.41
LYPLA1	O75608	0.910856	0.936	0.0357	-0.0179	0.0179
LYPLA2	O95372	0.416801	0.906	0.293	-0.146	0.146
LYST	Q99698	0.30773	0.891	-0.496	0.248	-0.248
MAGEA6	P43360	0.390974	0.903	-0.456	0.228	-0.228
MAGED2	Q9UNF1	0.268817	0.883	1.07	-0.534	0.534
MAGIX	Q9H6Y5	0.280609	0.886	-0.818	0.409	-0.409
MAGOH	P61326	0.674766	0.925	0.0566	-0.0283	0.0283
MANF	P55145	0.978954	0.938	0.00545	-0.00273	0.00273
MAP2K2	P36507	0.307595	0.891	-0.268	0.134	-0.134
MAP4	P27816	0.0169944	0.455	1.26	-0.628	0.628
MAPK1	P28482	0.117461	0.821	-0.459	0.229	-0.229
MAPK14	Q16539	0.525933	0.916	0.302	-0.151	0.151
MAPRE1	Q15691	0.210716	0.868	-0.199	0.0995	-0.0995
MARCKS	P29966	0.108786	0.813	0.325	-0.163	0.163
MARS	P56192	0.171713	0.854	0.276	-0.138	0.138
MAT2A	P31153	0.203545	0.866	-0.135	0.0677	-0.0677
MAT2B	Q9NZL9	0.0742903	0.768	-0.366	0.183	-0.183
MATR3	P43243	0.817892	0.932	0.0269	-0.0134	0.0134
MBNL1	Q9NR56	0.0805539	0.779	-2.2	1.1	-1.1
MCF2L2	Q86YR7	0.800928	0.932	-0.121	0.0606	-0.0606
MCM2	P49736	0.430712	0.907	0.281	-0.14	0.14
MCM3	P25205	0.691664	0.926	0.0651	-0.0325	0.0325
MCM4	P33991	0.0221609	0.529	-0.291	0.146	-0.146
MCM5	P33992	0.645099	0.924	0.0447	-0.0224	0.0224
MCM6	Q14566	0.322599	0.893	0.265	-0.132	0.132
MCM7	P33993	0.0707854	0.762	-0.348	0.174	-0.174
MCMBP	Q9BTE3	0.0156872	0.432	-0.657	0.329	-0.329
MCTS1	Q9ULC4	0.0901444	0.792	0.268	-0.134	0.134
MDH1	P40925	0.319529	0.893	0.562	-0.281	0.281
MDH2	P40926	0.302046	0.89	0.454	-0.227	0.227
ME2	P23368	0.0662656	0.752	0.211	-0.106	0.106
METAP2	P50579	0.364279	0.9	-0.219	0.11	-0.11
METTL15	A6NJ78	0.0709433	0.762	4.37	-2.18	2.18
MEX3C	Q5U5Q3	0.580937	0.92	-0.54	0.27	-0.27
MFHAS1	Q9Y4C4	0.391963	0.903	-1.02	0.511	-0.511
MGEA5	O60502	0.946491	0.937	-0.00914	0.00457	-0.00457
MIA3	Q5JRA6	0.234457	0.875	-0.216	0.108	-0.108
MIPEP	Q99797	0.338478	0.896	-2.06	1.03	-1.03
MLEC	Q14165	0.764255	0.93	0.0395	-0.0198	0.0198
MMS19	Q96T76	0.233336	0.875	0.28	-0.14	0.14
MOB1A;MOB1B	Q9H8S9;Q7L9L4	0.288105	0.887	0.642	-0.321	0.321
MOB4	Q9Y3A3	0.0619832	0.742	0.395	-0.198	0.198
MOGS	Q13724	0.326095	0.894	0.186	-0.0931	0.0931
MON1A	Q86VX9	0.498534	0.914	-0.363	0.181	-0.181
MRPL1	Q9BYD6	0.339851	0.896	0.632	-0.316	0.316
MRPL12	P52815	0.255607	0.88	0.165	-0.0827	0.0827
MRPL21	Q7Z2W9	0.0463598	0.694	-2.53	1.27	-1.27
MRPL39	Q9NYK5	0.0542599	0.722	1.86	-0.93	0.93
MRPS30	Q9NP92	0.071986	0.764	0.732	-0.366	0.366
MRRF	Q96E11	0.314203	0.892	0.135	-0.0673	0.0673
MSH2	P43246	0.291333	0.888	-0.137	0.0685	-0.0685
MSN	P26038	0.00443263	0.122	0.446	-0.223	0.223
MT-CO2	P00403	0.00747312	0.229	1.05	-0.523	0.523
MT1M	Q8N339	0.286709	0.887	1.75	-0.875	0.875
MT2A	P02795	0.604411	0.921	-0.139	0.0694	-0.0694
MTAP	Q13126	0.113844	0.818	0.694	-0.347	0.347
MTCH2	Q9Y6C9	0.417787	0.906	0.208	-0.104	0.104
MTHFD1	P11586	0.39125	0.903	0.091	-0.0455	0.0455
MTHFD2	P13995	0.419539	0.906	-0.674	0.337	-0.337
MTHFD2L	Q9H903	0.765567	0.93	0.274	-0.137	0.137
MTPN	P58546	0.0844245	0.784	1.77	-0.887	0.887
MUC3B	Q9H195	0.0472408	0.698	-4.82	2.41	-2.41
MVD	P53602	0.358405	0.899	0.104	-0.0518	0.0518
MVP	Q14764	0.352056	0.898	-0.0924	0.0462	-0.0462
MYDGF	Q969H8	0.058249	0.733	0.283	-0.141	0.141
MYH9	P35579	0.0484821	0.702	0.617	-0.308	0.308
MYL12B	O14950	0.234572	0.875	0.227	-0.113	0.113
MYL3	P08590	0.268141	0.883	0.429	-0.214	0.214
MYL6	P60660	0.051607	0.713	0.413	-0.206	0.206
MYO10	Q9HD67	0.0884717	0.79	-3.51	1.76	-1.76
MYO1B	O43795	0.126483	0.828	-0.184	0.0918	-0.0918
MYO1D	O94832	0.100835	0.805	-0.545	0.273	-0.273
MYOF	Q9NZM1	0.222705	0.872	0.244	-0.122	0.122
MYOM2	P54296	0.0367043	0.649	-0.515	0.257	-0.257
NAA10	P41227	0.109931	0.814	-0.513	0.256	-0.256
NAA15	Q9BXJ9	0.354843	0.898	-0.132	0.066	-0.066
NAA60	Q9H7X0	0.0710511	0.762	1.35	-0.674	0.674
NACA	E9PAV3;Q13765	0.000565139	0.000931	0.971	-0.486	0.486
NAE1	Q13564	0.21014	0.868	-0.172	0.0858	-0.0858
NAF1	Q96HR8	0.0570307	0.73	0.591	-0.296	0.296
NAGK	Q9UJ70	0.871855	0.935	0.0201	-0.01	0.01
NAMPT	P43490	0.00155073	0.0171	0.559	-0.279	0.279
NANS	Q9NR45	0.567819	0.919	0.108	-0.0541	0.0541
NAP1L1	P55209	0.267967	0.883	-0.125	0.0623	-0.0623
NAP1L4	Q99733	0.844241	0.933	0.0184	-0.00918	0.00918
NAPA	P54920	0.710534	0.927	0.0907	-0.0454	0.0454
NAPRT	Q6XQN6	0.820627	0.932	0.0319	-0.016	0.016
NARS	O43776	0.0144835	0.408	0.721	-0.36	0.36
NASP	P49321	0.766806	0.93	0.0394	-0.0197	0.0197
NAT10	Q9H0A0	0.493769	0.913	-0.115	0.0576	-0.0576
NCAPD2	Q15021	0.564342	0.919	0.218	-0.109	0.109
NCAPH	Q15003	0.0857233	0.786	-0.348	0.174	-0.174
NCBP1	Q09161	0.558115	0.918	-0.0817	0.0409	-0.0409
NCEH1	Q6PIU2	0.035655	0.643	-0.326	0.163	-0.163
NCL	P19338	0.104791	0.809	0.201	-0.101	0.101
NDC1	Q9BTX1	0.0677563	0.755	3.03	-1.51	1.51
NDRG1	Q92597	0.742655	0.929	-0.0324	0.0162	-0.0162
NECAB2	Q7Z6G3	0.0754283	0.77	3.04	-1.52	1.52
NEDD4	P46934	0.360182	0.899	2.03	-1.01	1.01
NEDD8	Q15843	0.211827	0.869	1.29	-0.646	0.646
NELFB	Q8WX92	0.139825	0.837	0.719	-0.36	0.36
NFATC3	Q12968	0.357484	0.899	0.616	-0.308	0.308
NFKB1	P19838	0.169772	0.853	0.396	-0.198	0.198
NFKB2	Q00653	0.849172	0.934	-0.11	0.0552	-0.0552
NGDN	Q8NEJ9	0.0585938	0.734	1.55	-0.774	0.774
NIT2	Q9NQR4	0.922361	0.936	0.0169	-0.00844	0.00844
NLE1	Q9NVX2	0.26085	0.882	0.553	-0.276	0.276
NLRP12	P59046	0.245848	0.878	-0.17	0.0849	-0.0849
NMD3	Q96D46	0.0965981	0.8	-0.331	0.166	-0.166
NME1	P15531	0.0910702	0.793	1.55	-0.777	0.777
NME2	P22392	0.0100368	0.306	0.513	-0.257	0.257
NMES1	Q9C002	0.505644	0.914	0.0806	-0.0403	0.0403
NMNAT1	Q9HAN9	0.153799	0.845	1.62	-0.812	0.812
NMT1	P30419	0.000948467	0.00502	0.797	-0.398	0.398
NONO	Q15233	0.0019522	0.0282	-0.846	0.423	-0.423
NOS3	P29474	0.181088	0.858	-0.762	0.381	-0.381
NPAS3	Q8IXF0	0.393956	0.903	-1.31	0.653	-0.653
NPC1L1	Q9UHC9	0.938586	0.937	0.0687	-0.0343	0.0343
NPC2	P61916	0.1845	0.859	0.221	-0.11	0.11
NPEPPS	P55786	0.831121	0.933	-0.0236	0.0118	-0.0118
NPM1	P06748	0.0114885	0.343	0.843	-0.421	0.421
NRD1	O43847	0.368917	0.9	-0.329	0.164	-0.164
NSDHL	Q15738	0.797789	0.931	0.0452	-0.0226	0.0226
NSFL1C	Q9UNZ2	0.358391	0.899	0.118	-0.0588	0.0588
NSUN2	Q08J23	0.451357	0.909	0.0787	-0.0393	0.0393
NT5E	P21589	0.881087	0.935	0.0521	-0.026	0.026
NUBP2	Q9Y5Y2	0.316398	0.892	-0.991	0.495	-0.495
NUDC	Q9Y266	0.154209	0.845	-0.275	0.138	-0.138
NUDCD1	Q96RS6	0.189261	0.861	-0.216	0.108	-0.108
NUDT21	O43809	0.771944	0.93	-0.0412	0.0206	-0.0206
NUDT4	A0A024RBG1;Q9NZJ9	0.511839	0.915	-0.139	0.0695	-0.0695
NUDT5	Q9UKK9	0.406153	0.905	0.384	-0.192	0.192
NUP133	Q8WUM0	0.184578	0.859	1.15	-0.577	0.577
NUP155	O75694	0.162156	0.849	-0.193	0.0964	-0.0964
NUP188	Q5SRE5	0.164681	0.85	0.667	-0.334	0.334
NUP205	Q92621	0.48945	0.913	-1.31	0.653	-0.653
NUP37	Q8NFH4	0.171905	0.854	1.28	-0.64	0.64
NUP62	P37198	0.118074	0.821	1.79	-0.897	0.897
NUP88	Q99567	0.160719	0.848	1.87	-0.937	0.937
NUP93	Q8N1F7	0.215339	0.87	-0.165	0.0826	-0.0826
NUTF2	P61970	0.85917	0.934	-0.0239	0.0119	-0.0119
NXN	Q6DKJ4	0.892735	0.935	-0.0234	0.0117	-0.0117
OAS3	Q9Y6K5	0.248005	0.879	-1.19	0.593	-0.593
OAT	P04181	0.984466	0.939	0.00339	-0.0017	0.0017
OGDH	Q02218	0.0967847	0.8	-0.349	0.175	-0.175
OGFR	Q9NZT2	0.0620083	0.743	0.356	-0.178	0.178
OGT	O15294	0.557812	0.918	-0.0876	0.0438	-0.0438
OLA1	Q9NTK5	0.904852	0.936	0.0117	-0.00583	0.00583
OLAH	Q9NV23	0.267124	0.883	0.691	-0.345	0.345
OPN3	Q9H1Y3	0.0674311	0.755	-1.97	0.987	-0.987
OPTC	Q9UBM4	0.675287	0.926	0.25	-0.125	0.125
OR2A4	O95047	0.223557	0.872	2.19	-1.09	1.09
OR52A4P	A6NMU1	0.143146	0.839	-0.482	0.241	-0.241
OSBP	P22059	0.130689	0.831	-0.507	0.254	-0.254
OSGEP	Q9NPF4	0.478467	0.912	0.318	-0.159	0.159
OSTF1	Q92882	0.304384	0.89	0.34	-0.17	0.17
OTOF	Q9HC10	0.365899	0.9	-0.167	0.0834	-0.0834
OTUB1	Q96FW1	0.765167	0.93	-0.112	0.0559	-0.0559
OTUD6B	Q8N6M0	0.178454	0.856	-0.608	0.304	-0.304
OXCT1	P55809	0.150481	0.843	1.19	-0.594	0.594
P0DP25;P0DP24;P0DP23	P0DP25;P0DP24;P0DP23	0.0139012	0.396	0.479	-0.239	0.239
P2RY13	Q9BPV8	0.0734432	0.767	-1.25	0.623	-0.623
P4HB	P07237	0.278053	0.885	-0.181	0.0905	-0.0905
PA2G4	Q9UQ80	0.0935865	0.797	0.225	-0.113	0.113
PABPC1	P11940	0.0668712	0.754	0.264	-0.132	0.132
PABPC4	Q13310	0.202098	0.865	0.175	-0.0877	0.0877
PABPN1	Q86U42	0.706378	0.927	-0.0493	0.0246	-0.0246
PAFAH1B1	P43034	0.027277	0.582	0.795	-0.397	0.397
PAFAH1B2	P68402	0.184025	0.859	0.179	-0.0896	0.0896
PAFAH1B3	Q15102	0.393379	0.903	0.515	-0.258	0.258
PAICS	P22234	0.0169063	0.454	0.298	-0.149	0.149
PAK2	Q13177	0.0162946	0.443	-0.345	0.173	-0.173
PALM	O75781	0.401295	0.904	1.15	-0.574	0.574
PARK7	Q99497	0.678159	0.926	0.0398	-0.0199	0.0199
PARP1	P09874	0.0173119	0.46	-0.385	0.193	-0.193
PBDC1	Q9BVG4	0.0848663	0.785	-0.578	0.289	-0.289
PBK	Q96KB5	0.0265067	0.575	-0.472	0.236	-0.236
PC	P11498	0.0596874	0.737	-1.1	0.548	-0.548
PCBP1	Q15365	0.239161	0.876	-0.136	0.0682	-0.0682
PCBP2	Q15366	0.395203	0.903	-0.0957	0.0478	-0.0478
PCDH11Y	Q9BZA8	0.811945	0.932	-0.225	0.113	-0.113
PCDHA9	Q9Y5H5	0.108719	0.813	2.75	-1.38	1.38
PCDHGA9	Q9Y5G4	0.957727	0.938	0.00845	-0.00422	0.00422
PCMT1	P22061	0.294876	0.889	-0.16	0.08	-0.08
PCNA	P12004	0.528375	0.916	0.0695	-0.0347	0.0347
PCNP	Q8WW12	0.264954	0.883	0.506	-0.253	0.253
PDAP1	Q13442	0.139477	0.837	-1.32	0.66	-0.66
PDCD10	Q9BUL8	0.544831	0.917	-0.0811	0.0405	-0.0405
PDCD5	O14737	0.00860354	0.263	0.382	-0.191	0.191
PDCD6	O75340	0.0132006	0.382	0.963	-0.481	0.481
PDCD6IP	Q8WUM4	0.582023	0.92	-0.119	0.0596	-0.0596
PDCL3	Q9H2J4	0.00704695	0.215	2.23	-1.11	1.11
PDE4D	Q08499	0.0935531	0.797	-2.61	1.31	-1.31
PDHA1	P08559	0.224531	0.872	-0.489	0.244	-0.244
PDHB	P11177	0.91715	0.936	-0.0218	0.0109	-0.0109
PDIA3	P30101	0.387169	0.902	-0.124	0.062	-0.062
PDIA4	P13667	0.303802	0.89	-0.12	0.0599	-0.0599
PDIA6	Q15084	0.0106506	0.322	-0.432	0.216	-0.216
PDLIM1	O00151	0.0728954	0.766	0.239	-0.12	0.12
PDLIM5	Q96HC4	0.679973	0.926	-0.0813	0.0407	-0.0407
PDXK	O00764	0.568468	0.919	-0.083	0.0415	-0.0415
PEA15	Q15121	0.210993	0.868	0.158	-0.079	0.079
PEBP1	P30086	0.00194735	0.028	0.531	-0.266	0.266
PEPD	P12955	0.0628612	0.745	-1.05	0.526	-0.526
PER3	P56645	0.883776	0.935	0.0453	-0.0227	0.0227
PES1	O00541	0.00633697	0.191	-3.66	1.83	-1.83
PFAS	O15067	0.753807	0.929	0.101	-0.0504	0.0504
PFDN1	O60925	0.222687	0.872	0.546	-0.273	0.273
PFDN2	Q9UHV9	0.646993	0.924	0.0973	-0.0487	0.0487
PFDN4	Q9NQP4	0.0824214	0.781	0.922	-0.461	0.461
PFDN5	Q99471	0.00674061	0.205	1.3	-0.652	0.652
PFDN6	O15212	0.098963	0.803	-0.222	0.111	-0.111
PFKL	P17858	0.632387	0.923	-0.296	0.148	-0.148
PFKM	P08237	0.190265	0.861	0.344	-0.172	0.172
PFKP	Q01813	0.368991	0.9	0.114	-0.0571	0.0571
PFN1	P07737	0.0240487	0.55	0.343	-0.171	0.171
PFN2	P35080	0.0953101	0.799	-0.736	0.368	-0.368
PFN3	P60673	0.053291	0.719	-0.989	0.495	-0.495
PGAM1	P18669	0.0236086	0.546	0.339	-0.17	0.17
PGD	P52209	0.533637	0.916	-0.108	0.0541	-0.0541
PGK1	P00558	0.0391705	0.662	0.239	-0.119	0.119
PGLS	O95336	0.66649	0.925	-0.0571	0.0286	-0.0286
PGM1	P36871	0.874604	0.935	0.0188	-0.00942	0.00942
PGM2	Q96G03	0.869744	0.934	0.0314	-0.0157	0.0157
PGM3	O95394	0.024721	0.557	-0.481	0.24	-0.24
PGP	A6NDG6	0.936488	0.937	-0.00995	0.00498	-0.00498
PGPEP1L	A6NFU8	0.0566617	0.729	-1.27	0.635	-0.635
PGRMC1	O00264	0.411872	0.905	0.114	-0.0571	0.0571
PHB	P35232	0.0238629	0.548	0.345	-0.173	0.173
PHB2	Q99623	0.23228	0.875	-0.141	0.0706	-0.0706
PHGDH	O43175	0.108066	0.812	-0.189	0.0943	-0.0943
PHPT1	Q9NRX4	0.00142804	0.0143	0.747	-0.374	0.374
PIGO	Q8TEQ8	0.432482	0.908	0.406	-0.203	0.203
PIH1D2	Q8WWB5	0.827187	0.933	-0.0852	0.0426	-0.0426
PIM2	Q9P1W9	0.11894	0.822	-0.965	0.483	-0.483
PITPNA	Q00169	0.462019	0.91	-0.277	0.138	-0.138
PITPNB	P48739	0.00825622	0.253	-0.61	0.305	-0.305
PKD1L1	Q8TDX9	0.768305	0.93	0.359	-0.179	0.179
PKM	P14618	0.345485	0.897	-0.19	0.0949	-0.0949
PLCB3	Q01970	0.0227631	0.536	-0.347	0.173	-0.173
PLCH1	Q4KWH8	0.319484	0.893	-0.28	0.14	-0.14
PLEC	Q15149	0.61047	0.922	0.0648	-0.0324	0.0324
PLEK2	Q9NYT0	0.462278	0.91	-0.14	0.0699	-0.0699
PLEKHM2	Q8IWE5	0.967892	0.938	-0.0106	0.00528	-0.00528
PLIN3	O60664	0.196835	0.864	0.679	-0.34	0.34
PLS1	Q14651	0.723364	0.928	0.117	-0.0583	0.0583
PLS3	P13797	0.0523631	0.716	-0.263	0.132	-0.132
PLXDC1	Q8IUK5	0.924032	0.936	-0.0347	0.0173	-0.0173
PMM2	O15305	0.445659	0.909	0.465	-0.232	0.232
PMPCA	Q10713	0.181159	0.858	-0.188	0.0942	-0.0942
PMPCB	O75439	0.78949	0.931	0.129	-0.0646	0.0646
PNP	P00491	0.0291562	0.598	0.323	-0.161	0.161
PNPT1	Q8TCS8	0.997034	0.939	-0.000505	0.000252	-0.000252
PODNL1	Q6PEZ8	0.307594	0.891	1.2	-0.602	0.602
PODXL2	Q9NZ53	0.110596	0.815	-0.306	0.153	-0.153
POLDIP2	Q9Y2S7	0.35478	0.898	0.233	-0.116	0.116
POLE3	Q9NRF9	0.075694	0.771	1.28	-0.64	0.64
POLR1C	O15160	0.24601	0.878	-0.239	0.119	-0.119
POLR2H	P52434	0.362369	0.899	0.175	-0.0877	0.0877
POTEE	Q6S8J3	0.389687	0.903	-0.129	0.0647	-0.0647
PPA1	Q15181	0.00854867	0.262	0.629	-0.314	0.314
PPIA	P62937;P0DN37	0.0473309	0.698	0.225	-0.112	0.112
PPIB	P23284	0.704812	0.927	0.183	-0.0915	0.0915
PPID	Q08752	0.276981	0.885	1.28	-0.641	0.641
PPIF	P30405	0.794369	0.931	-0.0388	0.0194	-0.0194
PPIL1	Q9Y3C6	0.500336	0.914	0.735	-0.367	0.367
PPM1G	O15355	0.0471729	0.698	-0.317	0.159	-0.159
PPME1	Q9Y570	0.84187	0.933	0.116	-0.0582	0.0582
PPP1CB	P62140	0.199178	0.864	0.728	-0.364	0.364
PPP1CC	P36873	0.193993	0.862	0.228	-0.114	0.114
PPP1R12A	O14974	0.417855	0.906	-0.287	0.143	-0.143
PPP1R7	Q15435	0.661904	0.925	0.0644	-0.0322	0.0322
PPP2CA;PPP2CB	P67775;P62714	0.577221	0.92	0.111	-0.0553	0.0553
PPP2R1A	P30153	0.205811	0.867	-0.202	0.101	-0.101
PPP2R2A	P63151	0.129939	0.83	0.223	-0.112	0.112
PPP2R4	Q15257	0.997857	0.939	-0.00149	0.000744	-0.000744
PPP3CA	Q08209	0.340398	0.896	1.1	-0.551	0.551
PPP3R1	P63098	0.00283252	0.0599	1	-0.5	0.5
PPP6C	O00743	0.0426082	0.679	1.13	-0.567	0.567
PPT1	P50897	0.0504995	0.71	-0.504	0.252	-0.252
PRDX1	Q06830	0.109164	0.813	0.647	-0.323	0.323
PRDX2	P32119	0.0614235	0.741	0.292	-0.146	0.146
PRDX3	P30048	0.838671	0.933	0.0694	-0.0347	0.0347
PRDX4	Q13162	0.28676	0.887	-0.128	0.0641	-0.0641
PRDX5	P30044	0.187002	0.86	0.161	-0.0807	0.0807
PRDX6	P30041	0.980792	0.939	-0.0039	0.00195	-0.00195
PREP	P48147	0.147935	0.842	0.19	-0.0948	0.0948
PRICKLE2	Q7Z3G6	0.663857	0.925	-0.465	0.233	-0.233
PRKAG1	P54619	0.0778371	0.774	0.93	-0.465	0.465
PRKAR1A	P10644	0.48609	0.913	-0.183	0.0914	-0.0914
PRKAR2A	P13861	0.594775	0.921	-0.0995	0.0497	-0.0497
PRKCDBP	Q969G5	0.153606	0.845	3.34	-1.67	1.67
PRKCSH	P14314	0.642674	0.924	0.094	-0.047	0.047
PRKDC	P78527	0.662905	0.925	-0.0448	0.0224	-0.0224
PRMT1	Q99873	0.914939	0.936	-0.0134	0.00668	-0.00668
PRMT3	O60678	0.330571	0.895	-0.419	0.209	-0.209
PRMT5	O14744	0.213071	0.869	0.186	-0.0929	0.0929
PRMT7	Q9NVM4	0.225521	0.873	-0.737	0.368	-0.368
PRPF19	Q9UMS4	0.288444	0.887	0.101	-0.0503	0.0503
PRPF3	O43395	0.0536814	0.72	-0.302	0.151	-0.151
PRPF8	Q6P2Q9	0.613132	0.922	-0.0621	0.0311	-0.0311
PRPS1	P60891	0.0341299	0.634	3.2	-1.6	1.6
PRPS2	P11908	0.922171	0.936	0.0632	-0.0316	0.0316
PRPSAP1	Q14558	0.0758813	0.771	-0.746	0.373	-0.373
PRPSAP2	O60256	0.869769	0.934	0.0713	-0.0356	0.0356
PSAP	P07602	0.00211587	0.0334	0.795	-0.398	0.398
PSAT1	Q9Y617	0.646884	0.924	-0.149	0.0746	-0.0746
PSMA1	P25786	0.284543	0.887	-0.482	0.241	-0.241
PSMA3	P25788	0.17207	0.854	-0.336	0.168	-0.168
PSMA4	P25789	0.0643867	0.748	0.688	-0.344	0.344
PSMA5	P28066	0.956217	0.938	0.00832	-0.00416	0.00416
PSMA6	P60900	0.104184	0.808	1.17	-0.586	0.586
PSMA7	O14818	0.224782	0.872	-0.212	0.106	-0.106
PSMB1	P20618	0.579406	0.92	0.1	-0.0502	0.0502
PSMB3	P49720	0.5944	0.921	-0.18	0.0902	-0.0902
PSMB4	P28070	0.0586856	0.734	0.45	-0.225	0.225
PSMB5	P28074	0.772894	0.93	0.119	-0.0597	0.0597
PSMB6	P28072	0.984398	0.939	0.00333	-0.00166	0.00166
PSMB7	Q99436	0.336456	0.896	2.56	-1.28	1.28
PSMC1	P62191	0.582156	0.92	-0.137	0.0685	-0.0685
PSMC2	P35998	0.116228	0.82	-0.191	0.0957	-0.0957
PSMC3	P17980	0.715952	0.928	-0.037	0.0185	-0.0185
PSMC4	P43686	0.00537943	0.158	0.408	-0.204	0.204
PSMC5	P62195	0.240032	0.877	0.179	-0.0894	0.0894
PSMC6	P62333	0.0591504	0.735	0.355	-0.178	0.178
PSMD1	Q99460	0.245946	0.878	-0.192	0.0962	-0.0962
PSMD10	O75832	0.35876	0.899	0.928	-0.464	0.464
PSMD11	O00231	0.36981	0.9	0.0996	-0.0498	0.0498
PSMD12	O00232	0.517909	0.915	0.072	-0.036	0.036
PSMD13	Q9UNM6	0.0132486	0.383	0.517	-0.259	0.259
PSMD14	O00487	0.930384	0.937	-0.00895	0.00448	-0.00448
PSMD2	Q13200	0.894831	0.935	0.0128	-0.00638	0.00638
PSMD3	O43242	0.316156	0.892	-0.158	0.079	-0.079
PSMD4	P55036	0.579622	0.92	0.0552	-0.0276	0.0276
PSMD5	Q16401	0.0317271	0.617	0.282	-0.141	0.141
PSMD6	Q15008	0.0445951	0.687	0.844	-0.422	0.422
PSMD7	P51665	0.240033	0.877	0.148	-0.0741	0.0741
PSMD8	P48556	0.230441	0.874	0.243	-0.121	0.121
PSMD9	O00233	0.380567	0.902	0.588	-0.294	0.294
PSME1	Q06323	0.0886778	0.79	-0.604	0.302	-0.302
PSME2	Q9UL46	0.0881353	0.79	0.229	-0.115	0.115
PSME3	P61289	0.225106	0.873	-0.304	0.152	-0.152
PSMF1	Q92530	0.701642	0.927	-0.0854	0.0427	-0.0427
PSMG2	Q969U7	0.0376992	0.655	-1.06	0.528	-0.528
PSPC1	Q8WXF1	0.70178	0.927	-0.0368	0.0184	-0.0184
PTBP1	P26599	0.448179	0.909	0.0684	-0.0342	0.0342
PTBP2	Q9UKA9	0.123933	0.826	-2.56	1.28	-1.28
PTBP3	O95758	0.277355	0.885	-1.22	0.608	-0.608
PTCHD1	Q96NR3	0.00370244	0.0941	-0.496	0.248	-0.248
PTGES2	Q9H7Z7	0.148935	0.842	0.812	-0.406	0.406
PTGES3	Q15185	0.510634	0.915	0.191	-0.0957	0.0957
PTGR1	Q14914	0.14153	0.838	-0.744	0.372	-0.372
PTGS1	P23219	0.192138	0.862	0.549	-0.275	0.275
PTMA	P06454	0.146701	0.841	-0.868	0.434	-0.434
PTPN21	Q16825	0.0501726	0.708	-1.13	0.565	-0.565
PTPN7	P35236	0.410203	0.905	-1.96	0.982	-0.982
PTPRU	Q92729	0.00820029	0.252	-2.21	1.1	-1.1
PTRF	Q6NZI2	0.12894	0.83	-0.302	0.151	-0.151
PUF60	Q9UHX1	0.159462	0.848	0.301	-0.151	0.151
PXDC1	Q5TGL8	0.553563	0.918	0.523	-0.261	0.261
PXN	P49023	0.98786	0.939	-0.00235	0.00117	-0.00117
PYCR1	P32322	0.0571302	0.73	1.51	-0.753	0.753
PYCR2	Q96C36	0.340983	0.896	0.632	-0.316	0.316
PYGL	P06737	0.531542	0.916	0.322	-0.161	0.161
Q6ZT62	Q6ZT62	0.148509	0.842	-1.86	0.93	-0.93
Q9H8V8	Q9H8V8	0.427153	0.907	-0.184	0.0919	-0.0919
QARS	P47897	0.149179	0.842	-0.214	0.107	-0.107
QTRT1	Q9BXR0	0.547729	0.917	-0.307	0.153	-0.153
RAB10	P61026	0.585467	0.92	0.125	-0.0624	0.0624
RAB11B	Q15907	0.0182439	0.475	0.545	-0.273	0.273
RAB14	P61106	0.0846773	0.785	0.422	-0.211	0.211
RAB1A	P62820	0.0197856	0.498	0.899	-0.45	0.45
RAB1B	Q9H0U4	0.574665	0.919	0.457	-0.229	0.229
RAB21	Q9UL25	0.864256	0.934	0.0478	-0.0239	0.0239
RAB2A	P61019	0.066909	0.754	0.767	-0.384	0.384
RAB5C	P51148	0.464766	0.911	0.0776	-0.0388	0.0388
RAB6A	P20340	0.78631	0.931	0.0511	-0.0256	0.0256
RAB7A	P51149	0.440788	0.908	0.448	-0.224	0.224
RAC1	P63000	0.00404806	0.107	-0.568	0.284	-0.284
RAC2	P15153	0.0367342	0.649	-0.317	0.159	-0.159
RAD23A	P54725	0.0244029	0.554	-1.36	0.681	-0.681
RAD23B	P54727	0.00441307	0.121	1.57	-0.783	0.783
RAET1E	Q8TD07	0.532353	0.916	0.212	-0.106	0.106
RALB	P11234	0.162307	0.849	-0.159	0.0794	-0.0794
RALGPS2	Q86X27	0.608617	0.922	-0.412	0.206	-0.206
RAN	P62826	0.536357	0.917	-0.109	0.0546	-0.0546
RANBP1	P43487	0.937947	0.937	0.0253	-0.0127	0.0127
RANBP6	O60518	0.284028	0.886	1.06	-0.529	0.529
RANGAP1	P46060	0.0902235	0.792	0.25	-0.125	0.125
RAP1A	P62834	0.659243	0.925	0.0537	-0.0269	0.0269
RAP1B	P61224;A6NIZ1	0.0481712	0.701	-0.259	0.129	-0.129
RAP2B	P61225	0.479721	0.912	-0.216	0.108	-0.108
RARS	P54136	0.886146	0.935	0.014	-0.00702	0.00702
RBBP4	Q09028	0.0552385	0.724	-0.268	0.134	-0.134
RBBP7	Q16576	0.244124	0.878	0.406	-0.203	0.203
RBM12	Q9NTZ6	0.821848	0.932	-0.068	0.034	-0.034
RBM3	P98179	0.0570658	0.73	-0.695	0.348	-0.348
RBM39	Q14498	0.0226463	0.535	0.475	-0.238	0.238
RBM8A	Q9Y5S9	0.353967	0.898	0.873	-0.436	0.436
RBP4	P02753	0.00588929	0.176	-0.83	0.415	-0.415
RCC1	P18754	0.581123	0.92	-0.0615	0.0307	-0.0307
RCC2	Q9P258	0.289645	0.888	-0.13	0.0652	-0.0652
RCN1	Q15293	0.162495	0.849	1.44	-0.722	0.722
RDH11	Q8TC12	0.386732	0.902	-0.218	0.109	-0.109
RDX	P35241	0.0552266	0.724	-0.318	0.159	-0.159
RECK	O95980	0.0621923	0.743	-0.874	0.437	-0.437
RECQL	P46063	0.0858311	0.786	0.217	-0.108	0.108
RELA	Q04206	0.238534	0.876	0.216	-0.108	0.108
RER1	O15258	0.888594	0.935	-0.0602	0.0301	-0.0301
REV__A0PK05	REV__A0PK05	0.371602	0.9	1.5	-0.748	0.748
REV__A2RUH7	REV__A2RUH7	0.000511257	0.000661	0.826	-0.413	0.413
REV__A6BM72	REV__A6BM72	0.0219523	0.526	1.53	-0.765	0.765
REV__A6NC57	REV__A6NC57	0.216827	0.87	-1.98	0.99	-0.99
REV__A6NGA9	REV__A6NGA9	0.285579	0.887	-0.186	0.0931	-0.0931
REV__A6NMB1	REV__A6NMB1	0.00574937	0.171	-1.69	0.843	-0.843
REV__A8K979	REV__A8K979	0.117089	0.82	0.371	-0.186	0.186
REV__B1ANY3	REV__B1ANY3	0.798256	0.931	0.0417	-0.0209	0.0209
REV__B7Z1M9	REV__B7Z1M9	0.703848	0.927	0.526	-0.263	0.263
REV__I6L899	REV__I6L899	0.254172	0.88	-0.751	0.376	-0.376
REV__O00230	REV__O00230	0.123283	0.825	-0.419	0.209	-0.209
REV__O00311	REV__O00311	0.241622	0.877	-0.342	0.171	-0.171
REV__O00423	REV__O00423	0.0665688	0.753	-0.622	0.311	-0.311
REV__O14645	REV__O14645	0.603923	0.921	-1.18	0.589	-0.589
REV__O15118	REV__O15118	0.0347899	0.638	2.5	-1.25	1.25
REV__O15350	REV__O15350	0.103238	0.807	2.11	-1.05	1.05
REV__O43490	REV__O43490	0.240453	0.877	-0.42	0.21	-0.21
REV__O43592	REV__O43592	0.293607	0.888	0.655	-0.328	0.328
REV__O43598	REV__O43598	0.0620217	0.743	2.21	-1.1	1.1
REV__O60494	REV__O60494	0.392385	0.903	-1.26	0.628	-0.628
REV__O60575	REV__O60575	0.702724	0.927	0.0347	-0.0174	0.0174
REV__O60603	REV__O60603	0.357515	0.899	1.19	-0.597	0.597
REV__O60732	REV__O60732	0.0724341	0.765	3.28	-1.64	1.64
REV__O75140	REV__O75140	0.199176	0.864	-0.229	0.115	-0.115
REV__O75185	REV__O75185	0.0760698	0.771	1.8	-0.902	0.902
REV__O75325	REV__O75325	0.420323	0.906	-0.157	0.0787	-0.0787
REV__O75417	REV__O75417	0.123199	0.825	0.788	-0.394	0.394
REV__O75445	REV__O75445	0.163224	0.85	-1.04	0.522	-0.522
REV__O75461	REV__O75461	0.0297787	0.603	0.353	-0.177	0.177
REV__O75467	REV__O75467	0.0452391	0.69	-2.8	1.4	-1.4
REV__O75473	REV__O75473	0.284507	0.887	-1.89	0.944	-0.944
REV__O75914	REV__O75914	0.115527	0.819	-0.999	0.499	-0.499
REV__O75969	REV__O75969	0.48235	0.912	-0.796	0.398	-0.398
REV__O94844	REV__O94844	0.383136	0.902	-0.204	0.102	-0.102
REV__O94983	REV__O94983	0.543551	0.917	-0.0922	0.0461	-0.0461
REV__O95347	REV__O95347	0.282837	0.886	-1.64	0.82	-0.82
REV__O95405	REV__O95405	0.194144	0.863	2.77	-1.38	1.38
REV__O95490	REV__O95490	0.0711185	0.762	-2.64	1.32	-1.32
REV__O95967	REV__O95967	0.320553	0.893	1.53	-0.767	0.767
REV__O96009	REV__O96009	0.0437045	0.684	2.98	-1.49	1.49
REV__P00374	REV__P00374	0.36258	0.899	-0.321	0.16	-0.16
REV__P01210	REV__P01210	0.271448	0.884	0.839	-0.419	0.419
REV__P01266	REV__P01266	0.656055	0.924	-0.147	0.0736	-0.0736
REV__P03952	REV__P03952	0.00373701	0.0954	-3.28	1.64	-1.64
REV__P03956	REV__P03956	0.397112	0.904	-0.719	0.359	-0.359
REV__P04183	REV__P04183	0.00344508	0.084	-0.64	0.32	-0.32
REV__P04424	REV__P04424	0.29262	0.888	-1.43	0.714	-0.714
REV__P05166	REV__P05166	0.877325	0.935	-0.021	0.0105	-0.0105
REV__P08758	REV__P08758	0.264797	0.882	0.988	-0.494	0.494
REV__P0C1S8	REV__P0C1S8	0.983445	0.939	0.00695	-0.00347	0.00347
REV__P0C221	REV__P0C221	0.276661	0.885	0.195	-0.0977	0.0977
REV__P0CG39	REV__P0CG39	0.0523568	0.716	1.69	-0.844	0.844
REV__P0CG43	REV__P0CG43	0.236699	0.876	1.2	-0.598	0.598
REV__P13010	REV__P13010	0.5807	0.92	-0.204	0.102	-0.102
REV__P18440	REV__P18440	0.584727	0.92	-0.0694	0.0347	-0.0347
REV__P20382	REV__P20382	0.638149	0.923	0.545	-0.272	0.272
REV__P20742	REV__P20742	0.0368872	0.65	2.36	-1.18	1.18
REV__P21359	REV__P21359	0.607176	0.922	0.235	-0.118	0.118
REV__P21675	REV__P21675	0.253634	0.88	-0.492	0.246	-0.246
REV__P22102	REV__P22102	0.288347	0.887	3.01	-1.5	1.5
REV__P22670	REV__P22670	0.0347446	0.637	-1.42	0.71	-0.71
REV__P22676	REV__P22676	0.41001	0.905	0.582	-0.291	0.291
REV__P25325	REV__P25325	0.189228	0.861	-1.99	0.994	-0.994
REV__P29374	REV__P29374	0.341184	0.896	2.09	-1.05	1.05
REV__P30520	REV__P30520	0.352501	0.898	-1.35	0.676	-0.676
REV__P30530	REV__P30530	0.0584307	0.733	-3.39	1.69	-1.69
REV__P38398	REV__P38398	0.00506945	0.146	5.33	-2.66	2.66
REV__P42858	REV__P42858	0.149016	0.842	1.5	-0.748	0.748
REV__P46100	REV__P46100	0.0592936	0.736	-3.64	1.82	-1.82
REV__P49685	REV__P49685	0.439762	0.908	-0.189	0.0943	-0.0943
REV__P49715	REV__P49715	0.295449	0.889	2.01	-1	1
REV__P51512	REV__P51512	0.22792	0.873	0.362	-0.181	0.181
REV__P51690	REV__P51690	0.12753	0.828	-1.37	0.683	-0.683
REV__P51797	REV__P51797	0.0181925	0.475	0.511	-0.256	0.256
REV__P51812	REV__P51812	0.0117036	0.348	1.41	-0.704	0.704
REV__P52564	REV__P52564	0.276459	0.885	1.15	-0.575	0.575
REV__P53396	REV__P53396	0.951655	0.937	0.0245	-0.0123	0.0123
REV__P53618	REV__P53618	0.745442	0.929	-0.148	0.0738	-0.0738
REV__P53675	REV__P53675	0.199669	0.865	-0.422	0.211	-0.211
REV__P53992	REV__P53992	0.603805	0.921	1.15	-0.577	0.577
REV__P54886	REV__P54886	0.298798	0.889	-1.32	0.659	-0.659
REV__P55011	REV__P55011	0.362884	0.899	1.02	-0.511	0.511
REV__P55056	REV__P55056	0.760402	0.93	0.656	-0.328	0.328
REV__P56851	REV__P56851	0.071101	0.762	1.77	-0.884	0.884
REV__P56975	REV__P56975	0.948609	0.937	-0.00805	0.00403	-0.00403
REV__P62068	REV__P62068	0.738051	0.929	-0.242	0.121	-0.121
REV__P63130	REV__P63130	0.0689255	0.758	-2.34	1.17	-1.17
REV__P68431;REV__Q71DI3;REV__P84243	REV__P68431;REV__Q71DI3;REV__P84243	0.773814	0.93	-0.106	0.0529	-0.0529
REV__Q00610	REV__Q00610	0.927386	0.937	-0.0635	0.0317	-0.0317
REV__Q04637	REV__Q04637	0.415218	0.906	-0.0911	0.0455	-0.0455
REV__Q05329	REV__Q05329	0.0953245	0.799	-1.09	0.546	-0.546
REV__Q06495	REV__Q06495	0.685316	0.926	0.15	-0.075	0.075
REV__Q06587	REV__Q06587	0.713375	0.928	0.167	-0.0836	0.0836
REV__Q08AH3	REV__Q08AH3	0.3974	0.904	0.227	-0.114	0.114
REV__Q09328	REV__Q09328	0.0247245	0.557	-0.81	0.405	-0.405
REV__Q09666	REV__Q09666	0.122326	0.825	-1.33	0.665	-0.665
REV__Q0P6D2	REV__Q0P6D2	0.519919	0.915	0.921	-0.46	0.46
REV__Q10567	REV__Q10567	0.147289	0.841	0.387	-0.194	0.194
REV__Q12768	REV__Q12768	0.140515	0.837	2.88	-1.44	1.44
REV__Q12913	REV__Q12913	0.741327	0.929	-0.147	0.0737	-0.0737
REV__Q13144	REV__Q13144	0.394277	0.903	-1.55	0.774	-0.774
REV__Q13347	REV__Q13347	0.417718	0.906	0.223	-0.111	0.111
REV__Q13418	REV__Q13418	0.0519163	0.714	-2.92	1.46	-1.46
REV__Q13485	REV__Q13485	0.0131869	0.381	0.53	-0.265	0.265
REV__Q13625	REV__Q13625	0.458665	0.91	0.914	-0.457	0.457
REV__Q14106	REV__Q14106	0.390581	0.903	-0.158	0.0788	-0.0788
REV__Q147U1	REV__Q147U1	0.225853	0.873	0.666	-0.333	0.333
REV__Q15233	REV__Q15233	0.21905	0.871	-3.05	1.53	-1.53
REV__Q15393	REV__Q15393	0.3659	0.9	-0.524	0.262	-0.262
REV__Q15413	REV__Q15413	0.0942611	0.797	2.25	-1.13	1.13
REV__Q16850	REV__Q16850	0.107313	0.812	-1.98	0.988	-0.988
REV__Q16851	REV__Q16851	0.701337	0.927	0.0669	-0.0335	0.0335
REV__Q2M2I5	REV__Q2M2I5	0.0526254	0.717	-0.297	0.149	-0.149
REV__Q2WGJ8	REV__Q2WGJ8	0.171011	0.853	-0.935	0.468	-0.468
REV__Q3MIW9	REV__Q3MIW9	0.0152229	0.423	-1.22	0.61	-0.61
REV__Q4G0T1	REV__Q4G0T1	0.763887	0.93	-0.376	0.188	-0.188
REV__Q562E7	REV__Q562E7	0.650786	0.924	0.0849	-0.0424	0.0424
REV__Q58A45	REV__Q58A45	0.501435	0.914	-0.0818	0.0409	-0.0409
REV__Q5BKX6	REV__Q5BKX6	0.149638	0.843	2.05	-1.03	1.03
REV__Q5JPB2	REV__Q5JPB2	0.0525306	0.716	2.63	-1.32	1.32
REV__Q5JTH9	REV__Q5JTH9	0.532677	0.916	0.291	-0.145	0.145
REV__Q5JTZ9	REV__Q5JTZ9	0.116513	0.82	-2.63	1.32	-1.32
REV__Q5SYC1	REV__Q5SYC1	0.16194	0.849	-0.636	0.318	-0.318
REV__Q5SZK8	REV__Q5SZK8	0.750826	0.929	-0.081	0.0405	-0.0405
REV__Q5T3F8	REV__Q5T3F8	0.0726225	0.765	-0.921	0.461	-0.461
REV__Q5T6X5	REV__Q5T6X5	0.907638	0.936	-0.015	0.00749	-0.00749
REV__Q5TGL8	REV__Q5TGL8	0.129757	0.83	1.45	-0.727	0.727
REV__Q5TZF3	REV__Q5TZF3	0.397483	0.904	-1.65	0.823	-0.823
REV__Q5VTT5	REV__Q5VTT5	0.0894675	0.791	0.962	-0.481	0.481
REV__Q5VZB9	REV__Q5VZB9	0.366684	0.9	0.955	-0.478	0.478
REV__Q5VZK9	REV__Q5VZK9	0.33023	0.895	1.62	-0.808	0.808
REV__Q6AI08	REV__Q6AI08	0.0205698	0.509	-2.45	1.23	-1.23
REV__Q6IQ49	REV__Q6IQ49	0.102392	0.807	-1.88	0.942	-0.942
REV__Q6P4E1	REV__Q6P4E1	0.00339383	0.082	1.06	-0.531	0.531
REV__Q6PP77	REV__Q6PP77	0.600909	0.921	0.506	-0.253	0.253
REV__Q6RUI8	REV__Q6RUI8	0.091078	0.793	-4.13	2.07	-2.07
REV__Q6UY01	REV__Q6UY01	0.169105	0.852	1.12	-0.562	0.562
REV__Q6UY14	REV__Q6UY14	0.297421	0.889	0.375	-0.188	0.188
REV__Q6YHU6	REV__Q6YHU6	0.361909	0.899	0.181	-0.0907	0.0907
REV__Q6ZMJ2	REV__Q6ZMJ2	0.690808	0.926	0.306	-0.153	0.153
REV__Q6ZNJ1	REV__Q6ZNJ1	0.0464463	0.695	1.67	-0.837	0.837
REV__Q6ZUV0	REV__Q6ZUV0	0.57332	0.919	-0.418	0.209	-0.209
REV__Q6ZUX3	REV__Q6ZUX3	0.326495	0.894	-0.574	0.287	-0.287
REV__Q6ZVL6	REV__Q6ZVL6	0.0780831	0.775	-2.54	1.27	-1.27
REV__Q71SY5	REV__Q71SY5	0.0104737	0.317	-2.48	1.24	-1.24
REV__Q75T13	REV__Q75T13	0.0391694	0.662	1.36	-0.682	0.682
REV__Q7RTR0	REV__Q7RTR0	0.0212576	0.518	-0.504	0.252	-0.252
REV__Q7RTW8	REV__Q7RTW8	0.0454195	0.691	1.07	-0.536	0.536
REV__Q7Z3U7	REV__Q7Z3U7	0.0178716	0.47	-0.52	0.26	-0.26
REV__Q86UY5	REV__Q86UY5	0.290541	0.888	-0.406	0.203	-0.203
REV__Q86VS8	REV__Q86VS8	0.504737	0.914	0.168	-0.0841	0.0841
REV__Q86WI1	REV__Q86WI1	0.0494106	0.706	-3.68	1.84	-1.84
REV__Q86WU2	REV__Q86WU2	0.00848911	0.26	-0.829	0.414	-0.414
REV__Q86X10	REV__Q86X10	0.109177	0.813	-0.372	0.186	-0.186
REV__Q86XP3	REV__Q86XP3	0.0777976	0.774	3.88	-1.94	1.94
REV__Q86YD1	REV__Q86YD1	0.780467	0.931	0.0633	-0.0317	0.0317
REV__Q86YV9	REV__Q86YV9	0.513822	0.915	0.277	-0.139	0.139
REV__Q8IVF5	REV__Q8IVF5	0.206492	0.867	-0.797	0.398	-0.398
REV__Q8IVU1	REV__Q8IVU1	0.389438	0.903	-1.14	0.569	-0.569
REV__Q8IYS1	REV__Q8IYS1	0.0928812	0.796	1.02	-0.512	0.512
REV__Q8IZD9	REV__Q8IZD9	0.460672	0.91	1.09	-0.544	0.544
REV__Q8IZF7	REV__Q8IZF7	0.16943	0.853	-1.44	0.722	-0.722
REV__Q8IZP7	REV__Q8IZP7	0.11551	0.819	5.69	-2.84	2.84
REV__Q8IZY2	REV__Q8IZY2	0.977225	0.938	0.0145	-0.00726	0.00726
REV__Q8N1N0	REV__Q8N1N0	0.281207	0.886	-0.748	0.374	-0.374
REV__Q8N2M8	REV__Q8N2M8	0.373211	0.901	-1.24	0.62	-0.62
REV__Q8N3E9	REV__Q8N3E9	0.393129	0.903	-0.299	0.15	-0.15
REV__Q8N6D5	REV__Q8N6D5	0.290881	0.888	0.336	-0.168	0.168
REV__Q8N6Y1	REV__Q8N6Y1	0.13984	0.837	-0.218	0.109	-0.109
REV__Q8N960	REV__Q8N960	0.232103	0.874	-1.28	0.64	-0.64
REV__Q8NCI6	REV__Q8NCI6	0.0343299	0.635	-1.5	0.752	-0.752
REV__Q8NDM7	REV__Q8NDM7	0.0102817	0.312	-1.35	0.674	-0.674
REV__Q8NE63	REV__Q8NE63	0.138145	0.836	2.25	-1.12	1.12
REV__Q8NFA0	REV__Q8NFA0	0.457278	0.91	0.336	-0.168	0.168
REV__Q8NGC5	REV__Q8NGC5	0.408868	0.905	0.621	-0.311	0.311
REV__Q8NGG2;REV__Q8NG75	REV__Q8NGG2;REV__Q8NG75	0.219946	0.871	1.01	-0.503	0.503
REV__Q8NGK2	REV__Q8NGK2	0.286254	0.887	0.108	-0.0542	0.0542
REV__Q8NHH9	REV__Q8NHH9	0.455471	0.91	-0.636	0.318	-0.318
REV__Q8TAE7	REV__Q8TAE7	0.0596664	0.737	3.25	-1.63	1.63
REV__Q8TAK5	REV__Q8TAK5	0.432469	0.908	1.3	-0.649	0.649
REV__Q8TBB1	REV__Q8TBB1	0.606668	0.921	0.93	-0.465	0.465
REV__Q8TC27	REV__Q8TC27	0.247024	0.878	-0.497	0.249	-0.249
REV__Q8TCP9	REV__Q8TCP9	0.0892704	0.791	4.1	-2.05	2.05
REV__Q8TD26	REV__Q8TD26	0.386398	0.902	0.277	-0.138	0.138
REV__Q8TDB6	REV__Q8TDB6	0.00917192	0.281	1.7	-0.848	0.848
REV__Q8TDW0	REV__Q8TDW0	0.06301	0.745	3.42	-1.71	1.71
REV__Q8TDW7	REV__Q8TDW7	0.714462	0.928	0.471	-0.235	0.235
REV__Q8TDX6	REV__Q8TDX6	0.329429	0.894	0.544	-0.272	0.272
REV__Q8TF27	REV__Q8TF27	0.418884	0.906	-1.06	0.53	-0.53
REV__Q8TF32	REV__Q8TF32	0.617758	0.922	0.29	-0.145	0.145
REV__Q8WVF1	REV__Q8WVF1	0.457651	0.91	-0.689	0.345	-0.345
REV__Q8WXI7	REV__Q8WXI7	0.588807	0.92	-0.203	0.101	-0.101
REV__Q92521	REV__Q92521	0.302952	0.89	-0.442	0.221	-0.221
REV__Q92545	REV__Q92545	0.722963	0.928	-0.163	0.0813	-0.0813
REV__Q92558	REV__Q92558	0.00916574	0.281	2.83	-1.41	1.41
REV__Q92565	REV__Q92565	0.618183	0.922	-0.0827	0.0413	-0.0413
REV__Q92766	REV__Q92766	0.442932	0.909	1.42	-0.71	0.71
REV__Q92859	REV__Q92859	0.47959	0.912	-0.237	0.118	-0.118
REV__Q92886	REV__Q92886	0.04159	0.674	0.86	-0.43	0.43
REV__Q96AN5	REV__Q96AN5	0.255174	0.88	0.265	-0.133	0.133
REV__Q96CD0	REV__Q96CD0	0.305287	0.89	-0.358	0.179	-0.179
REV__Q96EZ8	REV__Q96EZ8	0.159098	0.848	0.737	-0.368	0.368
REV__Q96GD3	REV__Q96GD3	0.0855962	0.786	3.04	-1.52	1.52
REV__Q96J66	REV__Q96J66	0.0327855	0.625	-2.89	1.45	-1.45
REV__Q96JG6	REV__Q96JG6	0.29957	0.889	0.534	-0.267	0.267
REV__Q96KP1	REV__Q96KP1	0.274638	0.885	0.362	-0.181	0.181
REV__Q96NL1	REV__Q96NL1	0.5448	0.917	0.223	-0.112	0.112
REV__Q96P44	REV__Q96P44	0.0660697	0.752	-2.91	1.45	-1.45
REV__Q96P70	REV__Q96P70	0.0169518	0.454	-0.822	0.411	-0.411
REV__Q96PV7	REV__Q96PV7	0.580041	0.92	0.13	-0.065	0.065
REV__Q96RK0	REV__Q96RK0	0.033039	0.626	0.549	-0.274	0.274
REV__Q96RT1	REV__Q96RT1	0.895858	0.935	-0.0455	0.0228	-0.0228
REV__Q96SB4	REV__Q96SB4	0.513958	0.915	0.251	-0.126	0.126
REV__Q99542	REV__Q99542	0.0119518	0.354	-1.12	0.56	-0.56
REV__Q99570	REV__Q99570	0.207875	0.867	0.284	-0.142	0.142
REV__Q99666;REV__O14715	REV__Q99666;REV__O14715	0.746677	0.929	0.0487	-0.0244	0.0244
REV__Q99684	REV__Q99684	0.0841591	0.784	-1.48	0.74	-0.74
REV__Q99832	REV__Q99832	0.0480331	0.701	-2.33	1.16	-1.16
REV__Q9BQ48	REV__Q9BQ48	0.371735	0.9	3.14	-1.57	1.57
REV__Q9BRQ3	REV__Q9BRQ3	0.00759861	0.233	-1.11	0.553	-0.553
REV__Q9BTA0	REV__Q9BTA0	0.21549	0.87	-0.311	0.156	-0.156
REV__Q9BUL5	REV__Q9BUL5	0.176257	0.856	0.915	-0.457	0.457
REV__Q9BV20	REV__Q9BV20	0.969201	0.938	0.00445	-0.00222	0.00222
REV__Q9BX95	REV__Q9BX95	0.716612	0.928	-0.324	0.162	-0.162
REV__Q9BXA6	REV__Q9BXA6	0.233822	0.875	2.51	-1.26	1.26
REV__Q9BXB1	REV__Q9BXB1	0.272381	0.884	0.942	-0.471	0.471
REV__Q9BYE2	REV__Q9BYE2	0.0884005	0.79	2.16	-1.08	1.08
REV__Q9BYZ6	REV__Q9BYZ6	0.124476	0.826	1.34	-0.668	0.668
REV__Q9BZ76	REV__Q9BZ76	0.966899	0.938	0.0147	-0.00733	0.00733
REV__Q9GZN4	REV__Q9GZN4	0.390991	0.903	1.7	-0.852	0.852
REV__Q9H0F6	REV__Q9H0F6	0.380655	0.902	-0.714	0.357	-0.357
REV__Q9H0V1	REV__Q9H0V1	0.34025	0.896	-0.331	0.165	-0.165
REV__Q9H1B4	REV__Q9H1B4	0.324404	0.894	-0.691	0.345	-0.345
REV__Q9H254	REV__Q9H254	0.00540021	0.158	-3.02	1.51	-1.51
REV__Q9H497	REV__Q9H497	0.310909	0.891	2.7	-1.35	1.35
REV__Q9H4Z3	REV__Q9H4Z3	0.216383	0.87	1.42	-0.71	0.71
REV__Q9H598	REV__Q9H598	0.646295	0.924	1.28	-0.64	0.64
REV__Q9H665	REV__Q9H665	0.0901474	0.792	-2.8	1.4	-1.4
REV__Q9H7L9	REV__Q9H7L9	0.112216	0.816	-2.01	1	-1
REV__Q9H8G2	REV__Q9H8G2	0.030877	0.611	-0.343	0.172	-0.172
REV__Q9H9A7	REV__Q9H9A7	0.903811	0.936	0.0286	-0.0143	0.0143
REV__Q9H9T3	REV__Q9H9T3	0.0942367	0.797	1.57	-0.785	0.785
REV__Q9HAR2	REV__Q9HAR2	0.628672	0.923	0.804	-0.402	0.402
REV__Q9HAT2	REV__Q9HAT2	0.38389	0.902	0.734	-0.367	0.367
REV__Q9HBX3	REV__Q9HBX3	0.949109	0.937	0.0222	-0.0111	0.0111
REV__Q9HC84	REV__Q9HC84	0.748789	0.929	0.109	-0.0543	0.0543
REV__Q9HCP6	REV__Q9HCP6	0.180068	0.857	-2.67	1.33	-1.33
REV__Q9NPI7	REV__Q9NPI7	0.471301	0.911	-0.304	0.152	-0.152
REV__Q9NQ75	REV__Q9NQ75	0.27943	0.886	-0.331	0.166	-0.166
REV__Q9NQV6	REV__Q9NQV6	0.133606	0.833	-2.82	1.41	-1.41
REV__Q9NS18	REV__Q9NS18	0.369031	0.9	2.96	-1.48	1.48
REV__Q9NSY0	REV__Q9NSY0	0.118182	0.821	1.73	-0.865	0.865
REV__Q9NVX0	REV__Q9NVX0	0.269514	0.884	-1.62	0.809	-0.809
REV__Q9NWM0	REV__Q9NWM0	0.389781	0.903	-1.36	0.678	-0.678
REV__Q9NYG8	REV__Q9NYG8	0.0506549	0.71	-0.591	0.296	-0.296
REV__Q9NYQ6	REV__Q9NYQ6	0.560793	0.918	0.0865	-0.0433	0.0433
REV__Q9NYT0	REV__Q9NYT0	0.242407	0.877	-0.169	0.0843	-0.0843
REV__Q9NZH0	REV__Q9NZH0	0.116269	0.82	-1.03	0.513	-0.513
REV__Q9NZK5	REV__Q9NZK5	0.0661942	0.752	-2.73	1.37	-1.37
REV__Q9NZV7	REV__Q9NZV7	0.577685	0.92	-0.0672	0.0336	-0.0336
REV__Q9NZW5	REV__Q9NZW5	0.201138	0.865	0.718	-0.359	0.359
REV__Q9P0M6	REV__Q9P0M6	0.317433	0.893	1.57	-0.787	0.787
REV__Q9P0Z9	REV__Q9P0Z9	0.602125	0.921	-0.467	0.234	-0.234
REV__Q9P1Y6	REV__Q9P1Y6	0.0704671	0.761	-0.405	0.203	-0.203
REV__Q9P246	REV__Q9P246	0.11958	0.822	-3.07	1.54	-1.54
REV__Q9P2K6	REV__Q9P2K6	0.104235	0.808	4.13	-2.06	2.06
REV__Q9P2S2	REV__Q9P2S2	0.961909	0.938	-0.0885	0.0442	-0.0442
REV__Q9UBC9	REV__Q9UBC9	0.190231	0.861	2.35	-1.18	1.18
REV__Q9ULP9	REV__Q9ULP9	0.229632	0.874	-0.981	0.49	-0.49
REV__Q9Y276	REV__Q9Y276	0.0828227	0.782	-2.21	1.1	-1.1
REV__Q9Y297	REV__Q9Y297	0.806267	0.932	0.272	-0.136	0.136
REV__Q9Y315	REV__Q9Y315	0.41729	0.906	0.511	-0.255	0.255
REV__Q9Y3D9	REV__Q9Y3D9	0.0202722	0.505	-0.822	0.411	-0.411
REV__Q9Y4A5	REV__Q9Y4A5	0.407597	0.905	0.211	-0.106	0.106
REV__Q9Y4K1	REV__Q9Y4K1	0.80125	0.932	-0.0703	0.0351	-0.0351
REV__Q9Y4U1	REV__Q9Y4U1	0.187098	0.86	2.04	-1.02	1.02
REV__Q9Y4X5	REV__Q9Y4X5	0.578286	0.92	-0.516	0.258	-0.258
REV__Q9Y530	REV__Q9Y530	0.453065	0.91	0.275	-0.137	0.137
REV__Q9Y597	REV__Q9Y597	0.181768	0.858	2.39	-1.19	1.19
REV__Q9Y5B0	REV__Q9Y5B0	0.434175	0.908	0.486	-0.243	0.243
REV__Q9Y5J1	REV__Q9Y5J1	0.0343947	0.635	4.76	-2.38	2.38
REV__Q9Y5Y4	REV__Q9Y5Y4	0.522178	0.916	-0.181	0.0903	-0.0903
REV__Q9Y617	REV__Q9Y617	0.0464532	0.695	0.374	-0.187	0.187
RFC4	P35249	0.30611	0.891	0.188	-0.0941	0.0941
RGPD8	O14715	0.203453	0.866	1.47	-0.736	0.736
RGS9BP	Q6ZS82	0.0209088	0.513	-3.27	1.63	-1.63
RHOA	P61586	0.68944	0.926	0.115	-0.0576	0.0576
RHOC	P08134	0.00481765	0.137	1.5	-0.75	0.75
RIBC2	Q9H4K1	0.376396	0.901	-0.871	0.436	-0.436
RIC1	Q4ADV7	0.587203	0.92	0.2	-0.1	0.1
RIF1	Q5UIP0	0.149287	0.842	-0.595	0.298	-0.298
RMDN1	Q96DB5	0.116839	0.82	1.33	-0.663	0.663
RNH1	P13489	0.0164294	0.445	0.4	-0.2	0.2
RNPEP	Q9H4A4	0.086071	0.787	-0.259	0.129	-0.129
RPA1	P27694	0.0559631	0.727	-0.573	0.287	-0.287
RPA2	P15927	0.413354	0.905	0.242	-0.121	0.121
RPL10	P27635	0.0131557	0.381	-0.514	0.257	-0.257
RPL10A	P62906	0.0984359	0.802	0.443	-0.222	0.222
RPL11	P62913	0.222715	0.872	0.307	-0.153	0.153
RPL12	P30050	0.650203	0.924	-0.0922	0.0461	-0.0461
RPL13	P26373	0.095739	0.799	-0.69	0.345	-0.345
RPL13A	P40429	0.29559	0.889	-0.158	0.079	-0.079
RPL13AP3	Q6NVV1	0.898092	0.936	-0.111	0.0553	-0.0553
RPL14	P50914	0.944699	0.937	0.026	-0.013	0.013
RPL15	P61313	0.530477	0.916	-0.123	0.0617	-0.0617
RPL17	P18621	0.0372096	0.652	-0.53	0.265	-0.265
RPL18	Q07020	0.159873	0.848	-0.2	0.1	-0.1
RPL18A	Q02543	0.00811646	0.249	-0.43	0.215	-0.215
RPL19	P84098	0.00423732	0.114	-0.468	0.234	-0.234
RPL21	P46778	0.00120193	0.00953	-0.897	0.449	-0.449
RPL22	P35268	0.181886	0.858	-0.234	0.117	-0.117
RPL23	P62829	0.901543	0.936	0.0282	-0.0141	0.0141
RPL23A	P62750	0.249381	0.879	0.266	-0.133	0.133
RPL26;RPL26L1	P61254;Q9UNX3	0.00598181	0.179	-0.539	0.269	-0.269
RPL27	P61353	0.223285	0.872	-0.165	0.0825	-0.0825
RPL27A	P46776	0.0017609	0.0227	-0.597	0.299	-0.299
RPL28	P46779	0.0174589	0.463	0.658	-0.329	0.329
RPL29	P47914	0.271092	0.884	-0.518	0.259	-0.259
RPL3	P39023	0.0288336	0.595	-0.264	0.132	-0.132
RPL30	P62888	0.124886	0.827	0.201	-0.1	0.1
RPL31	P62899	0.97819	0.938	0.00542	-0.00271	0.00271
RPL32	P62910	0.146255	0.841	-0.234	0.117	-0.117
RPL34	P49207	0.238727	0.876	-0.17	0.085	-0.085
RPL35	P42766	0.00530694	0.155	-0.563	0.282	-0.282
RPL35A	P18077	0.298789	0.889	0.383	-0.191	0.191
RPL36	Q9Y3U8	0.556267	0.918	-0.167	0.0833	-0.0833
RPL36AL;RPL36A	Q969Q0;P83881	0.0215696	0.522	-1.95	0.975	-0.975
RPL37A	P61513	0.925351	0.937	-0.0185	0.00924	-0.00924
RPL4	P36578	0.0037208	0.0948	-0.552	0.276	-0.276
RPL5	P46777	0.262659	0.882	-0.26	0.13	-0.13
RPL6	Q02878	0.119843	0.823	0.272	-0.136	0.136
RPL7	P18124	0.103252	0.807	-0.208	0.104	-0.104
RPL7A	P62424	0.00203238	0.0307	-0.652	0.326	-0.326
RPL8	P62917	0.899548	0.936	-0.0132	0.0066	-0.0066
RPL9	P32969	0.725495	0.928	-0.0488	0.0244	-0.0244
RPLP0;RPLP0P6	P05388;Q8NHW5	0.412242	0.905	0.187	-0.0934	0.0934
RPLP1	P05386	0.14006	0.837	-0.205	0.102	-0.102
RPLP2	P05387	0.50546	0.914	0.179	-0.0894	0.0894
RPN1	P04843	0.945731	0.937	0.00655	-0.00327	0.00327
RPN2	P04844	0.551771	0.918	-0.0623	0.0312	-0.0312
RPP30	P78346	0.83006	0.933	-0.0636	0.0318	-0.0318
RPRD1B	Q9NQG5	0.559699	0.918	-0.0659	0.033	-0.033
RPS10	P46783	0.00986784	0.301	-0.726	0.363	-0.363
RPS11	P62280	0.102472	0.807	-0.169	0.0847	-0.0847
RPS12	P25398	0.0670915	0.754	-0.235	0.117	-0.117
RPS13	P62277	0.32044	0.893	-0.113	0.0563	-0.0563
RPS14	P62263	0.185906	0.859	-0.295	0.147	-0.147
RPS15	P62841	0.540749	0.917	0.0641	-0.032	0.032
RPS15A	P62244	0.75349	0.929	-0.0714	0.0357	-0.0357
RPS16	P62249	0.00750924	0.23	-0.381	0.19	-0.19
RPS17	P08708	0.0379768	0.656	-0.253	0.127	-0.127
RPS18	P62269	0.0641792	0.748	0.259	-0.13	0.13
RPS19	P39019	0.797472	0.931	0.0321	-0.016	0.016
RPS2	P15880	0.0342318	0.634	-0.278	0.139	-0.139
RPS20	P60866	0.0131482	0.38	-0.564	0.282	-0.282
RPS21	P63220	0.092871	0.796	0.214	-0.107	0.107
RPS23	P62266	0.203079	0.866	-0.261	0.13	-0.13
RPS24	P62847	0.564343	0.919	0.078	-0.039	0.039
RPS25	P62851	0.119755	0.823	-0.794	0.397	-0.397
RPS26	P62854	0.00950754	0.291	-1.13	0.566	-0.566
RPS27	P42677;Q71UM5	0.250045	0.879	0.643	-0.321	0.321
RPS27A;UBB;UBC	P62979;P0CG47;P0CG48	0.0438431	0.684	0.944	-0.472	0.472
RPS28	P62857	0.00217733	0.0354	0.776	-0.388	0.388
RPS3	P23396	0.509722	0.915	-0.185	0.0923	-0.0923
RPS3A	P61247	0.0793934	0.777	0.262	-0.131	0.131
RPS4X	P62701	0.428925	0.907	0.0843	-0.0421	0.0421
RPS5	P46782	0.194233	0.863	0.254	-0.127	0.127
RPS6	P62753	0.0027058	0.055	-0.511	0.256	-0.256
RPS7	P62081	0.15068	0.843	-0.22	0.11	-0.11
RPS8	P62241	0.463112	0.911	-0.125	0.0624	-0.0624
RPS9	P46781	0.392326	0.903	0.125	-0.0627	0.0627
RPSA	P08865	0.0394951	0.664	0.556	-0.278	0.278
RRBP1	Q9P2E9	0.0663637	0.753	0.699	-0.35	0.35
RRM1	P23921	0.108175	0.812	0.321	-0.16	0.16
RRM2	P31350	0.767986	0.93	0.0432	-0.0216	0.0216
RRP9	O43818	0.303741	0.89	-0.436	0.218	-0.218
RSU1	Q15404	0.902041	0.936	-0.014	0.00701	-0.00701
RTCA	O00442	0.211513	0.868	0.311	-0.156	0.156
RTCB	Q9Y3I0	0.0599691	0.737	-0.265	0.133	-0.133
RTN4	Q9NQC3	0.00153804	0.0168	-0.893	0.446	-0.446
RUVBL1	Q9Y265	0.926282	0.937	0.0109	-0.00547	0.00547
RUVBL2	Q9Y230	0.0578602	0.732	-0.257	0.129	-0.129
S100A10	P60903	0.00439106	0.12	-0.581	0.29	-0.29
S100A11	P31949	0.952431	0.938	0.0118	-0.00592	0.00592
S100A16	Q96FQ6	0.139396	0.836	0.371	-0.186	0.186
S100A2	P29034	0.0526136	0.716	0.391	-0.196	0.196
S100A5	P33763	0.274468	0.885	0.777	-0.389	0.389
S100A6	P06703	0.000516909	0.000687	0.765	-0.383	0.383
SAE1	Q9UBE0	0.0151546	0.422	0.693	-0.346	0.346
SAMD9	Q5K651	0.503493	0.914	1.06	-0.531	0.531
SAMHD1	Q9Y3Z3	0.684002	0.926	-0.26	0.13	-0.13
SAR1A	Q9NR31	0.246899	0.878	0.988	-0.494	0.494
SAR1B	Q9Y6B6	0.0168045	0.452	-0.359	0.179	-0.179
SARNP	P82979	0.376334	0.901	0.59	-0.295	0.295
SARS	P49591	0.0665037	0.753	0.24	-0.12	0.12
SART1	O43290	0.0380598	0.656	2.32	-1.16	1.16
SATL1	Q86VE3	0.0777219	0.774	-3.13	1.57	-1.57
SBDS	Q9Y3A5	0.01087	0.328	0.567	-0.283	0.283
SCAMP3	O14828	0.360628	0.899	-0.154	0.0772	-0.0772
SCFD1	Q8WVM8	0.040882	0.671	0.335	-0.167	0.167
SCNN1B	P51168	0.976839	0.938	-0.00646	0.00323	-0.00323
SCNN1D	P51172	0.205085	0.866	-0.27	0.135	-0.135
SCP2	P22307	0.0036984	0.0939	0.522	-0.261	0.261
SCRN1	Q12765	0.291184	0.888	-0.117	0.0584	-0.0584
SDC4	P31431	0.166161	0.851	-0.476	0.238	-0.238
SDCBP	O00560	0.812601	0.932	0.0535	-0.0267	0.0267
SDHA	P31040	0.930641	0.937	-0.00856	0.00428	-0.00428
SDSL	Q96GA7	0.36031	0.899	0.249	-0.125	0.125
SEC11A	P67812	0.130979	0.831	-0.274	0.137	-0.137
SEC13	P55735	0.283538	0.886	-0.202	0.101	-0.101
SEC22B	O75396	0.00991556	0.302	-0.555	0.278	-0.278
SEC23A	Q15436	0.0496114	0.706	-0.558	0.279	-0.279
SEC23B	Q15437	0.306675	0.891	-0.17	0.0852	-0.0852
SEC24C	P53992	0.0949702	0.798	0.723	-0.362	0.362
SEC31A	O94979	0.144785	0.84	1.83	-0.916	0.916
SEC61A1	P61619	0.163352	0.85	-0.24	0.12	-0.12
SEC61B	P60468	0.0721048	0.764	-0.295	0.147	-0.147
SEC61G	P60059	0.310119	0.891	-1.32	0.66	-0.66
SERBP1	Q8NC51	0.588144	0.92	0.0823	-0.0411	0.0411
SERINC1	Q9NRX5	0.422726	0.906	-0.0974	0.0487	-0.0487
SERPINA1	P01009	0.134185	0.833	-0.411	0.205	-0.205
SERPINB1	P30740	0.447475	0.909	0.0745	-0.0373	0.0373
SERPINB2	P05120	0.183737	0.859	0.152	-0.0761	0.0761
SERPINB5	P36952	0.0429273	0.68	0.271	-0.135	0.135
SERPINB6	P35237	0.965209	0.938	0.00739	-0.0037	0.0037
SERPINB7	O75635	0.0635117	0.746	2.81	-1.4	1.4
SERPINB9	P50453	0.972858	0.938	-0.0132	0.0066	-0.0066
SERPINF1	P36955	0.252393	0.88	0.43	-0.215	0.215
SERPINF2	P08697	0.0822149	0.781	-2.26	1.13	-1.13
SERPINH1	P50454	0.497631	0.914	-0.0835	0.0417	-0.0417
SET	Q01105	0.213561	0.869	0.169	-0.0845	0.0845
SEZ6	Q53EL9	0.424385	0.907	0.46	-0.23	0.23
SF1	Q15637	0.560874	0.918	0.1	-0.05	0.05
SF3A1	Q15459	0.236542	0.876	0.166	-0.0829	0.0829
SF3A2	Q15428	0.138682	0.836	1.58	-0.791	0.791
SF3A3	Q12874	0.309206	0.891	-0.227	0.113	-0.113
SF3B1	O75533	0.209549	0.868	-0.51	0.255	-0.255
SF3B2	Q13435	0.189257	0.861	-0.298	0.149	-0.149
SF3B3	Q15393	0.897695	0.936	-0.0126	0.00631	-0.00631
SFN	P31947	0.0237659	0.547	0.445	-0.222	0.222
SFPQ	P23246	0.0302909	0.607	-0.449	0.225	-0.225
SFXN1	Q9H9B4	0.0887292	0.79	-0.248	0.124	-0.124
SGTA	O43765	0.257081	0.881	0.149	-0.0743	0.0743
SH2D2A	Q9NP31	0.220174	0.871	1.53	-0.764	0.764
SH3BGRL	O75368	0.307242	0.891	-0.225	0.113	-0.113
SH3BGRL3	Q9H299	0.283137	0.886	1.12	-0.559	0.559
SH3GL1	Q99961	0.492319	0.913	-0.206	0.103	-0.103
SH3GLB1	Q9Y371	0.860697	0.934	0.0295	-0.0148	0.0148
SHMT2	P34897	0.227925	0.873	-0.145	0.0726	-0.0726
SHQ1	Q6PI26	0.115192	0.819	1.57	-0.784	0.784
SIGLEC1	Q9BZZ2	0.371705	0.9	-1.88	0.941	-0.941
SKIV2L	Q15477	0.0624545	0.744	-4.85	2.42	-2.42
SKIV2L2	P42285	0.136001	0.834	0.748	-0.374	0.374
SKP1	P63208	0.1352	0.834	0.389	-0.194	0.194
SLC16A1	P53985	0.00670231	0.204	-0.425	0.212	-0.212
SLC16A3	O15427	0.278991	0.885	0.806	-0.403	0.403
SLC1A5	Q15758	0.426673	0.907	-0.5	0.25	-0.25
SLC25A11	Q02978	0.68967	0.926	0.0532	-0.0266	0.0266
SLC25A3	Q00325	0.535775	0.917	-0.152	0.0758	-0.0758
SLC25A38	Q96DW6	0.581736	0.92	-0.129	0.0643	-0.0643
SLC25A5	P05141	0.0116035	0.346	-0.359	0.179	-0.179
SLC25A6	P12236	0.921902	0.936	-0.0266	0.0133	-0.0133
SLC30A10	Q6XR72	0.765579	0.93	0.106	-0.0529	0.0529
SLC30A7	Q8NEW0	0.165346	0.851	0.195	-0.0973	0.0973
SLC35F4	A4IF30	0.777184	0.931	-0.377	0.188	-0.188
SLC38A2	Q96QD8	0.846292	0.934	-0.0509	0.0255	-0.0255
SLC3A2	P08195	0.123548	0.826	0.166	-0.0829	0.0829
SLC4A1AP	Q9BWU0	0.488517	0.913	-0.831	0.416	-0.416
SLC7A5	Q01650	0.0734349	0.767	-0.366	0.183	-0.183
SLC9A3R1	O14745	0.222044	0.872	0.149	-0.0744	0.0744
SLIRP	Q9GZT3	0.170287	0.853	-0.224	0.112	-0.112
SLMO2	Q9Y3B1	0.0399406	0.666	-5.66	2.83	-2.83
SMC2	O95347	0.104738	0.809	0.759	-0.38	0.38
SMC4	Q9NTJ3	0.372779	0.901	0.204	-0.102	0.102
SMS	P52788	0.0686306	0.757	0.208	-0.104	0.104
SNAP29	O95721	0.444675	0.909	0.405	-0.203	0.203
SNCG	O76070	0.671171	0.925	-0.112	0.0561	-0.0561
SND1	Q7KZF4	0.472949	0.911	-0.0938	0.0469	-0.0469
SNRNP200	O75643	0.12031	0.823	-0.416	0.208	-0.208
SNRNP70	P08621	0.120913	0.823	-0.408	0.204	-0.204
SNRPA	P09012	0.955507	0.938	-0.00927	0.00464	-0.00464
SNRPA1	P09661	0.207671	0.867	1.63	-0.813	0.813
SNRPB	P14678	0.179119	0.857	0.886	-0.443	0.443
SNRPD1	P62314	0.535343	0.917	-0.091	0.0455	-0.0455
SNRPD2	P62316	0.589039	0.92	-0.0692	0.0346	-0.0346
SNRPD3	P62318	0.309529	0.891	0.198	-0.0988	0.0988
SNRPE	P62304	0.0248058	0.558	-0.579	0.29	-0.29
SNRPF	P62306	0.12449	0.826	0.355	-0.177	0.177
SNX3	O60493	0.129529	0.83	-0.3	0.15	-0.15
SNX6	Q9UNH7	0.109835	0.814	0.524	-0.262	0.262
SOD1	P00441	0.484246	0.912	0.187	-0.0934	0.0934
SORD	Q00796	0.426285	0.907	0.105	-0.0526	0.0526
SPAG8	Q99932	0.255463	0.88	-0.372	0.186	-0.186
SPATS2L	Q9NUQ6	0.287963	0.887	0.631	-0.316	0.316
SPCS2	Q15005	0.248196	0.879	0.5	-0.25	0.25
SPDYE1	Q8NFV5	0.0815378	0.78	-0.324	0.162	-0.162
SPECC1L	Q69YQ0	0.817131	0.932	-0.0237	0.0118	-0.0118
SPINT2	O43291	0.316901	0.892	-0.205	0.103	-0.103
SPR	P35270	0.163344	0.85	0.155	-0.0775	0.0775
SPTAN1	Q13813	0.756664	0.93	0.0544	-0.0272	0.0272
SPTBN1	Q01082	0.434579	0.908	0.0879	-0.044	0.044
SPTLC1	O15269	0.663141	0.925	-0.125	0.0623	-0.0623
SQRDL	Q9Y6N5	0.489555	0.913	-0.0963	0.0481	-0.0481
SQSTM1	Q13501	0.93742	0.937	-0.0125	0.00625	-0.00625
SRI	P30626	0.113424	0.817	-0.285	0.143	-0.143
SRM	P19623	0.113731	0.817	1.3	-0.652	0.652
SRP14	P37108	0.369979	0.9	1.05	-0.525	0.525
SRP54	P61011	0.0796525	0.777	0.572	-0.286	0.286
SRP68	Q9UHB9	0.36641	0.9	0.128	-0.0641	0.0641
SRP72	O76094	0.388368	0.903	-0.146	0.073	-0.073
SRP9	P49458	0.888491	0.935	0.107	-0.0537	0.0537
SRPR	P08240	0.26632	0.883	-0.174	0.0871	-0.0871
SRPRB	Q9Y5M8	0.0446084	0.687	-0.613	0.307	-0.307
SRSF1	Q07955	0.262763	0.882	0.518	-0.259	0.259
SRSF2	Q01130	0.204759	0.866	1.05	-0.524	0.524
SRSF3	P84103	0.762775	0.93	-0.054	0.027	-0.027
SRSF6	Q13247	0.586424	0.92	-0.0598	0.0299	-0.0299
SRSF7	Q16629	0.257154	0.881	-0.167	0.0834	-0.0834
SSB	P05455	0.298817	0.889	-0.146	0.0732	-0.0732
SSC5D	A1L4H1	0.219765	0.871	-2.89	1.45	-1.45
SSR4	P51571	0.0758917	0.771	2.09	-1.04	1.04
SSRP1	Q08945	0.537584	0.917	0.355	-0.178	0.178
ST13	P50502	0.570153	0.919	-0.148	0.074	-0.074
STAMBP	O95630	0.262794	0.882	0.755	-0.377	0.377
STAT1	P42224	0.0648965	0.749	0.861	-0.431	0.431
STAT2	P52630	0.341678	0.896	-0.301	0.15	-0.15
STAT3	P40763	0.311958	0.892	-0.14	0.0701	-0.0701
STIL	Q15468	0.0249417	0.56	-1.52	0.761	-0.761
STIM2	Q9P246	0.226325	0.873	3.98	-1.99	1.99
STIP1	P31948	0.0130263	0.378	0.63	-0.315	0.315
STK24	Q9Y6E0	0.633865	0.923	-0.123	0.0613	-0.0613
STK26	Q9P289	0.840595	0.933	-0.103	0.0517	-0.0517
STMN1	P16949	0.0963839	0.8	0.6	-0.3	0.3
STOM	P27105	0.537501	0.917	0.139	-0.0694	0.0694
STOML2	Q9UJZ1	0.00967764	0.296	0.522	-0.261	0.261
STRAP	Q9Y3F4	0.67436	0.925	-0.0637	0.0318	-0.0318
STRN3	Q13033	0.477821	0.912	0.673	-0.336	0.336
STS	P08842	0.0489598	0.704	3.16	-1.58	1.58
STX7	O15400	0.316302	0.892	0.344	-0.172	0.172
STXBP3	O00186	0.28366	0.886	1.58	-0.788	0.788
SUB1	P53999	0.0680376	0.756	0.285	-0.142	0.142
SUGT1	Q9Y2Z0	0.277925	0.885	0.135	-0.0675	0.0675
SUPT16H	Q9Y5B9	0.746243	0.929	0.0922	-0.0461	0.0461
SUPT4H1	P63272	0.0123106	0.362	-1.4	0.698	-0.698
SURF4	O15260	0.0321501	0.62	0.275	-0.137	0.137
SYAP1	Q96A49	0.113241	0.817	0.766	-0.383	0.383
SYNC	Q9H7C4	0.311551	0.892	-0.135	0.0675	-0.0675
SYNCRIP	O60506	0.0132928	0.383	0.788	-0.394	0.394
SYT2	Q8N9I0	0.982792	0.939	0.0114	-0.00568	0.00568
TACSTD2	P09758	0.366939	0.9	-0.176	0.0879	-0.0879
TAGLN2	P37802	0.00595876	0.178	0.446	-0.223	0.223
TALDO1	P37837	0.0409127	0.671	-0.239	0.119	-0.119
TAP1	Q03518	0.260193	0.881	0.41	-0.205	0.205
TAP2	Q03519	0.624268	0.923	0.151	-0.0753	0.0753
TAPBP	O15533	0.192401	0.862	-0.185	0.0925	-0.0925
TARDBP	Q13148	0.326557	0.894	-0.101	0.0505	-0.0505
TARS	P26639	0.465887	0.911	0.0948	-0.0474	0.0474
TAX1BP3	O14907	0.084541	0.785	0.579	-0.289	0.289
TBCA	O75347	0.67051	0.925	0.0685	-0.0342	0.0342
TBCB	Q99426	0.938934	0.937	-0.0229	0.0115	-0.0115
TBL1XR1	Q9BZK7	0.619534	0.922	0.515	-0.258	0.258
TBX15	Q96SF7	0.00312484	0.0714	0.924	-0.462	0.462
TCEB1	Q15369	0.583363	0.92	0.0678	-0.0339	0.0339
TCEB2	Q15370	0.16564	0.851	0.195	-0.0976	0.0976
TCP1	P17987	0.28563	0.887	0.11	-0.0549	0.0549
TCP10L2	B9ZVM9	0.597129	0.921	-0.483	0.242	-0.242
TDRD7	Q8NHU6	0.0865342	0.787	1.22	-0.61	0.61
TERF2	Q15554	0.216387	0.87	1.47	-0.734	0.734
TFG	Q92734	0.369251	0.9	-0.295	0.147	-0.147
TFIP11	Q9UBB9	0.197587	0.864	-0.225	0.113	-0.113
TFRC	P02786	0.0682367	0.756	0.224	-0.112	0.112
TGM2	P21980	0.127568	0.829	-0.172	0.0858	-0.0858
THBS1	P07996	0.055969	0.727	0.414	-0.207	0.207
TIAL1	Q01085	0.395089	0.903	0.475	-0.237	0.237
TIGAR	Q9NQ88	0.221986	0.872	0.963	-0.481	0.481
TIMM44	O43615	0.318674	0.893	1.17	-0.583	0.583
TIPRL	O75663	0.949061	0.937	0.0265	-0.0132	0.0132
TJP1	Q07157	0.178545	0.856	-0.867	0.434	-0.434
TJP2	Q9UDY2	0.19059	0.861	-0.218	0.109	-0.109
TK1	P04183	0.219313	0.871	-0.225	0.113	-0.113
TKT	P29401	0.0750859	0.77	-0.284	0.142	-0.142
TLDC1	Q6P9B6	0.853535	0.934	0.0344	-0.0172	0.0172
TLN1	Q9Y490	0.14395	0.839	0.232	-0.116	0.116
TLR1	Q15399	0.573228	0.919	-0.0941	0.047	-0.047
TMC1	Q8TDI8	0.390495	0.903	-0.104	0.0521	-0.0521
TMCO1	Q9UM00	0.0904566	0.793	0.9	-0.45	0.45
TMED10	P49755	0.0244173	0.554	-0.354	0.177	-0.177
TMED2	Q15363	0.929113	0.937	-0.0336	0.0168	-0.0168
TMED9	Q9BVK6	0.747772	0.929	-0.0416	0.0208	-0.0208
TMEM130	Q8N3G9	0.497987	0.914	0.317	-0.158	0.158
TMEM205	Q6UW68	0.000131037	8.77e-07	-0.97	0.485	-0.485
TMEM230	Q96A57	0.165781	0.851	-0.382	0.191	-0.191
TMEM33	P57088	0.221495	0.871	1.07	-0.536	0.536
TMEM40	Q8WWA1	0.61169	0.922	-0.131	0.0656	-0.0656
TMEM43	Q9BTV4	0.501275	0.914	0.474	-0.237	0.237
TMEM63A	O94886	0.060067	0.738	1.36	-0.679	0.679
TMEM71	Q6P5X7	0.127424	0.828	-3.69	1.84	-1.84
TMOD3	Q9NYL9	0.201277	0.865	0.219	-0.109	0.109
TMPO	P42166	0.221079	0.871	0.218	-0.109	0.109
TMPO.1	P42167	0.914852	0.936	-0.0568	0.0284	-0.0284
TMPRSS11A	Q6ZMR5	0.102486	0.807	3.65	-1.82	1.82
TMPRSS5	Q9H3S3	0.495711	0.913	-0.308	0.154	-0.154
TMSB10	P63313	0.0495403	0.706	0.515	-0.257	0.257
TMSB4X	P62328	0.615226	0.922	-0.0973	0.0486	-0.0486
TMX1	Q9H3N1	0.264452	0.882	-0.666	0.333	-0.333
TNKS1BP1	Q9C0C2	0.47705	0.912	0.119	-0.0595	0.0595
TNPO1	Q92973	0.822751	0.933	-0.0479	0.0239	-0.0239
TOLLIP	Q9H0E2	0.363328	0.899	-0.556	0.278	-0.278
TOMM22	Q9NS69	0.0179368	0.471	-0.412	0.206	-0.206
TOMM34	Q15785	0.220348	0.871	0.137	-0.0687	0.0687
TOMM70A	O94826	0.269667	0.884	-0.192	0.0961	-0.0961
TOP1	P11387	0.0831527	0.783	0.417	-0.208	0.208
TOP2B	Q02880	0.213655	0.869	1.21	-0.604	0.604
TPCN2	Q8NHX9	0.910344	0.936	0.204	-0.102	0.102
TPD52L2	O43399	0.107152	0.811	-0.468	0.234	-0.234
TPI1	P60174	0.423709	0.907	-0.0833	0.0417	-0.0417
TPM2	P07951	0.00347347	0.0851	0.511	-0.256	0.256
TPM3	P06753	0.0623998	0.743	-0.859	0.43	-0.43
TPP1	O14773	0.312311	0.892	0.741	-0.371	0.371
TPP2	P29144	0.849565	0.934	-0.0349	0.0174	-0.0174
TPRA1	Q86W33	0.781941	0.931	-0.078	0.039	-0.039
TPT1	P13693	0.365532	0.9	0.166	-0.0832	0.0832
TRAP1	Q12931	0.450626	0.909	0.169	-0.0846	0.0846
TRAPPC3	O43617	0.123117	0.825	0.666	-0.333	0.333
TRIM16	O95361	0.829481	0.933	-0.0997	0.0499	-0.0499
TRIM22	Q8IYM9	0.376591	0.901	-0.82	0.41	-0.41
TRIM25	Q14258	0.0156246	0.431	-0.852	0.426	-0.426
TRIM28	Q13263	0.0154766	0.428	0.441	-0.22	0.22
TRIM32	Q13049	0.0482202	0.701	-1.27	0.634	-0.634
TRIP13	Q15645	0.436566	0.908	0.225	-0.113	0.113
TRMT1	Q9NXH9	0.29417	0.888	0.342	-0.171	0.171
TRMT10C	Q7L0Y3	0.766255	0.93	0.175	-0.0877	0.0877
TRMT112	Q9UI30	0.0540381	0.721	1.48	-0.739	0.739
TRMT13	Q9NUP7	0.130128	0.83	-2.19	1.1	-1.1
TRPC6	Q9Y210	0.0272791	0.582	-0.909	0.455	-0.455
TRPM1	Q7Z4N2	0.510692	0.915	-0.152	0.0761	-0.0761
TSFM	P43897	0.0346442	0.637	-0.282	0.141	-0.141
TSN	Q15631	0.467232	0.911	-0.218	0.109	-0.109
TSNAX	Q99598	0.841641	0.933	0.0528	-0.0264	0.0264
TST	Q16762	0.0242212	0.552	-2.5	1.25	-1.25
TSTA3	Q13630	0.565085	0.919	0.223	-0.112	0.112
TTC1	Q99614	0.230919	0.874	0.89	-0.445	0.445
TTC4	O95801	0.394686	0.903	1.23	-0.617	0.617
TTLL12	Q14166	0.918738	0.936	-0.0169	0.00845	-0.00845
TUBA1B	P68363	0.182453	0.858	0.365	-0.183	0.183
TUBA1C	Q9BQE3	0.340806	0.896	0.31	-0.155	0.155
TUBA4A	P68366	0.43262	0.908	0.863	-0.432	0.432
TUBB	P07437	0.207522	0.867	0.281	-0.141	0.141
TUBB2A	Q13885	0.0202469	0.504	0.382	-0.191	0.191
TUBB3	Q13509	0.560584	0.918	-0.214	0.107	-0.107
TUBB4B	P68371	0.33008	0.895	0.225	-0.112	0.112
TUBB6	Q9BUF5	0.326606	0.894	-0.125	0.0623	-0.0623
TUBB8	Q3ZCM7	0.201812	0.865	0.132	-0.0662	0.0662
TUBG1	P23258	0.396228	0.904	0.11	-0.0548	0.0548
TUFM	P49411	0.374851	0.901	0.212	-0.106	0.106
TWF1	Q12792	0.927736	0.937	-0.0087	0.00435	-0.00435
TWF2	Q6IBS0	0.656566	0.924	0.441	-0.221	0.221
TXNDC12	O95881	0.455711	0.91	-0.134	0.0672	-0.0672
TXNDC17	Q9BRA2	0.0825263	0.782	0.451	-0.226	0.226
TXNDC5	Q8NBS9	0.138682	0.836	0.409	-0.205	0.205
TXNL1	O43396	0.516761	0.915	-0.158	0.0791	-0.0791
TXNRD1	Q16881	0.384473	0.902	-0.138	0.069	-0.069
TYK2	P29597	0.836356	0.933	-0.0564	0.0282	-0.0282
U2AF1L4	Q8WU68	0.384741	0.902	1.31	-0.656	0.656
U2AF2	P26368	0.235402	0.875	-0.201	0.1	-0.1
UAP1	Q16222	0.68575	0.926	0.132	-0.066	0.066
UBA1	P22314	0.646512	0.924	0.045	-0.0225	0.0225
UBA2	Q9UBT2	0.662176	0.925	-0.0769	0.0384	-0.0384
UBA3	Q8TBC4	0.859838	0.934	-0.0828	0.0414	-0.0414
UBA5	Q9GZZ9	0.130897	0.831	-0.301	0.15	-0.15
UBA6	A0AVT1	0.0138828	0.396	0.937	-0.468	0.468
UBAP2L	Q14157	0.0777216	0.774	0.425	-0.212	0.212
UBE2C	O00762	0.269826	0.884	0.427	-0.214	0.214
UBE2D3	P61077	0.942898	0.937	-0.0122	0.0061	-0.0061
UBE2E1	P51965	0.556832	0.918	-0.203	0.101	-0.101
UBE2K	P61086	0.76115	0.93	-0.0489	0.0244	-0.0244
UBE2L3	P68036	0.0185162	0.48	0.584	-0.292	0.292
UBE2L6	O14933	0.423387	0.907	0.254	-0.127	0.127
UBE2M	P61081	0.722853	0.928	-0.159	0.0797	-0.0797
UBE2N	P61088	0.0316709	0.617	-0.439	0.22	-0.22
UBE2S	Q16763	0.102322	0.806	-0.336	0.168	-0.168
UBE2V1	Q13404	0.617598	0.922	-0.0524	0.0262	-0.0262
UBE2V2	Q15819	0.074627	0.769	-0.222	0.111	-0.111
UBLCP1	Q8WVY7	0.572605	0.919	0.364	-0.182	0.182
UBQLN1	Q9UMX0	0.0124014	0.364	0.461	-0.231	0.231
UBXN1	Q04323	0.0205841	0.509	0.434	-0.217	0.217
UCHL3	P15374	0.579407	0.92	0.0767	-0.0384	0.0384
UCK2	Q9BZX2	0.613621	0.922	0.0495	-0.0247	0.0247
UFC1	Q9Y3C8	0.164622	0.85	-0.449	0.224	-0.224
UFM1	P61960	0.0367319	0.649	0.454	-0.227	0.227
UFSP2	Q9NUQ7	0.168834	0.852	-1.71	0.855	-0.855
UGDH	O60701	0.00809959	0.249	-0.413	0.206	-0.206
UGGT1	Q9NYU2	0.05651	0.728	-0.297	0.149	-0.149
UGP2	Q16851	0.789841	0.931	-0.0501	0.025	-0.025
UMPS	P11172	0.145521	0.84	-0.198	0.099	-0.099
UNC13D	Q70J99	0.677794	0.926	-0.173	0.0865	-0.0865
UPF1	Q92900	0.295052	0.889	-0.242	0.121	-0.121
UPP1	Q16831	0.263979	0.882	-0.202	0.101	-0.101
UQCRC1	P31930	0.267136	0.883	0.154	-0.0772	0.0772
UQCRC2	P22695	0.0405178	0.669	-0.304	0.152	-0.152
USH2A	O75445	0.327979	0.894	1.85	-0.925	0.925
USO1	O60763	0.323173	0.893	0.0961	-0.048	0.048
USP10	Q14694	0.040489	0.669	-0.544	0.272	-0.272
USP14	P54578	0.797588	0.931	-0.0261	0.013	-0.013
USP15	Q9Y4E8	0.915544	0.936	-0.0222	0.0111	-0.0111
USP39	Q53GS9	0.415359	0.906	-0.0924	0.0462	-0.0462
USP40	Q9NVE5	0.349405	0.897	-1.27	0.635	-0.635
USP5	P45974	0.760457	0.93	0.0495	-0.0247	0.0247
USP9X	Q93008	0.404347	0.904	-0.208	0.104	-0.104
VAMP8	Q9BV40	0.178381	0.856	0.361	-0.18	0.18
VAPA	Q9P0L0	0.166742	0.851	0.872	-0.436	0.436
VAPB	O95292	0.817054	0.932	0.301	-0.151	0.151
VARS	P26640	0.14766	0.841	-0.153	0.0767	-0.0767
VAT1	Q99536	0.264477	0.882	-0.23	0.115	-0.115
VBP1	P61758	0.85569	0.934	-0.0268	0.0134	-0.0134
VCL	P18206	0.0111654	0.335	0.351	-0.176	0.176
VCP	P55072	0.302434	0.89	0.119	-0.0595	0.0595
VDAC1	P21796	0.72204	0.928	0.102	-0.0512	0.0512
VDAC2	P45880	0.00701255	0.214	0.477	-0.238	0.238
VDAC3	Q9Y277	0.593911	0.921	0.0974	-0.0487	0.0487
VIM	P08670	0.222668	0.872	1.63	-0.817	0.817
VN1R17P	Q8TDU5	0.0675463	0.755	1.63	-0.817	0.817
VPS26A	O75436	0.0830117	0.782	0.463	-0.231	0.231
VPS29	Q9UBQ0	0.460449	0.91	0.104	-0.0518	0.0518
VPS35	Q96QK1	0.0565918	0.728	0.285	-0.142	0.142
VPS37B	Q9H9H4	0.829471	0.933	0.0301	-0.0151	0.0151
[truncated: 38 more rows]

## Sheet: Table S5
Table S5: Differentially Expressed Proteins with siMYC treatment
Protein Name	ID	P-Value	Adjusted P-value	Treatment_vs_Control_ratio	Control_centered	Treatment_centered
AFP	P02771	0.00087027	0.0101	-1.32	0.66	-0.66
AKAP12	Q02952	0.000202777	7.21e-05	1.55	-0.774	0.774
C1orf145	Q96MR7	0.000182417	4.56e-05	2.92	-1.46	1.46
CASP1	P29466	9.87468e-06	2.28e-14	3.33	-1.67	1.67
CHMP5	Q9NZZ3	0.000408954	0.00109	1.26	-0.628	0.628
CISD1	Q9NZ45	2.19714e-05	1.3e-11	4.45	-2.22	2.22
CLNS1A	P54105	0.000385705	0.000894	-1.2	0.598	-0.598
CPVL	Q9H3G5	4.48836e-05	7.88e-09	-1.45	0.723	-0.723
CYP4A11	Q02928	0.00150928	0.0342	2.22	-1.11	1.11
DDX58	O95786	3.35348e-05	7.06e-10	3.23	-1.61	1.61
DHX58	Q96C10	0.000492356	0.00201	2.07	-1.03	1.03
EIF2AK2	P19525	3.14595e-06	2.28e-14	2.39	-1.19	1.19
ERICH6	Q7L0X2	0.000508252	0.00221	2.15	-1.07	1.07
F3	P13726	0.000528858	0.00248	2.3	-1.15	1.15
FAM222B	Q8WU58	4.63596e-05	1e-08	3.06	-1.53	1.53
GNB3	P16520	1.96901e-05	4.12e-12	3.02	-1.51	1.51
GPATCH2	Q9NW75	5.52365e-05	3.69e-08	-2.55	1.27	-1.27
GSTK1	Q9Y2Q3	8.75063e-05	8.1e-07	1.11	-0.555	0.555
H1F0	P07305	1.14984e-06	2.28e-14	6.89	-3.45	3.45
HELZ2	Q9BYK8	0.000536957	0.00259	1.99	-0.995	0.995
HLA-B	P01889	0.0002853	0.0003	3.77	-1.89	1.89
HM13	Q8TCT9	0.00156948	0.0367	1.61	-0.803	0.803
HMGCL	P35914	0.000954161	0.0125	1.11	-0.556	0.556
IFI35	P80217	4.6325e-05	9.94e-09	3.52	-1.76	1.76
IFIT3	O14879	1.06328e-05	2.28e-14	5.43	-2.71	2.71
ISG15	P05161	9.17836e-06	2.28e-14	8.43	-4.21	4.21
KIR2DL5B;KIR2DL5A	Q8NHK3;Q8N109	4.96326e-05	1.68e-08	1.58	-0.791	0.791
KLC1	Q07866	2.92354e-05	2.13e-10	-2.35	1.17	-1.17
KLF3	P57682	9.43589e-07	2.28e-14	3.77	-1.88	1.88
LAP3	P28838	0.000284984	0.000298	1.29	-0.643	0.643
LATS1	O95835	5.64656e-06	2.28e-14	-4.72	2.36	-2.36
LGALS3BP	Q08380	0.000480656	0.00186	1.36	-0.682	0.682
MAP2K5	Q13163	1.6583e-05	6.22e-13	-2.24	1.12	-1.12
MCM7	P33993	0.000166614	2.99e-05	-1.04	0.519	-0.519
MX1	P20591	3.3486e-05	6.97e-10	7.01	-3.5	3.5
MX2	P20592	0.00153738	0.0354	1.26	-0.628	0.628
NMES1	Q9C002	3.41232e-05	8.11e-10	1.77	-0.883	0.883
NSFL1C	Q9UNZ2	5.83486e-05	5.38e-08	-2.42	1.21	-1.21
NSUN5P2	Q63ZY6;Q3KNT7	0.00175581	0.0463	-2.72	1.36	-1.36
NT5C3A	Q9H0P0	2.29348e-05	1.98e-11	2.19	-1.09	1.09
OAS2	P29728	3.87238e-05	2.41e-09	3.55	-1.78	1.78
OASL	Q15646	0.00069278	0.00556	2.51	-1.25	1.25
OR5C1	Q8NGR4;Q8NGQ5	1.6703e-06	2.28e-14	-6.87	3.43	-3.43
PARP12	Q9H0J9	1.71281e-05	8.76e-13	2.6	-1.3	1.3
PELP1	Q8IZL8	0.000940683	0.0121	-1.71	0.856	-0.856
PLA2G4A	P47712	8.00207e-05	4.68e-07	-3.65	1.83	-1.83
PRR13	Q9NZ81	0.000372971	0.0008	-2.46	1.23	-1.23
PTGER4	P35408	0.000104174	2.34e-06	2.74	-1.37	1.37
PTPRH	Q9HD43	7.91852e-06	2.28e-14	-3.56	1.78	-1.78
REV__A0AV02	REV__A0AV02	4.24463e-06	2.28e-14	3.61	-1.8	1.8
REV__A0PK05	REV__A0PK05	1.90725e-06	2.28e-14	-4.58	2.29	-2.29
REV__O14645	REV__O14645	0.000204227	7.42e-05	-1.11	0.557	-0.557
REV__O95416	REV__O95416	2.49008e-07	2.28e-14	-3.91	1.95	-1.95
REV__P20933	REV__P20933	2.21984e-07	2.28e-14	5.52	-2.76	2.76
REV__P63208	REV__P63208	0.000812094	0.00851	-2.53	1.27	-1.27
REV__Q12983	REV__Q12983	1.2367e-05	2.28e-14	-4.27	2.13	-2.13
REV__Q2TV78	REV__Q2TV78	1.05656e-05	2.28e-14	3.07	-1.54	1.54
REV__Q8IUN9	REV__Q8IUN9	0.000286288	0.000304	3.27	-1.63	1.63
REV__Q8N5I3	REV__Q8N5I3	0.00155195	0.036	4.85	-2.42	2.42
REV__Q8NFA0	REV__Q8NFA0	2.65778e-06	2.28e-14	4.86	-2.43	2.43
REV__Q8WW36	REV__Q8WW36	0.000315488	0.00044	2.58	-1.29	1.29
REV__Q92859	REV__Q92859	0.00032271	0.000478	3.82	-1.91	1.91
REV__Q96R48	REV__Q96R48	3.50246e-06	2.28e-14	6.12	-3.06	3.06
REV__Q96T51	REV__Q96T51	0.000849958	0.00954	4.21	-2.11	2.11
REV__Q9BZ81	REV__Q9BZ81	0.000272745	0.000252	-2.35	1.18	-1.18
REV__Q9NPD5	REV__Q9NPD5	0.000706636	0.00587	1.25	-0.626	0.626
REV__Q9UBP5	REV__Q9UBP5	8.69082e-07	2.28e-14	-5.78	2.89	-2.89
RRM1	P23921	8.21177e-05	5.48e-07	-1.34	0.668	-0.668
SBSPON	Q8IVN8	0.000384806	0.000887	1.69	-0.843	0.843
SCO2	O43819	0.000137263	1.12e-05	1.27	-0.636	0.636
SDC1	P18827	0.000929875	0.0118	1.72	-0.86	0.86
SERPINA4	P29622	1.93793e-07	2.28e-14	-3.66	1.83	-1.83
SERPINB1	P30740	0.00156937	0.0367	1.19	-0.595	0.595
STAT1	P42224	5.82721e-05	5.33e-08	4.08	-2.04	2.04
TAF9	Q16594	2.09937e-06	2.28e-14	3.35	-1.67	1.67
TAP1	Q03518	8.10792e-05	5.07e-07	1.61	-0.806	0.806
TAP2	Q03519	0.000194633	6.07e-05	2.89	-1.44	1.44
TARM1	B6A8C7	0.000188033	5.22e-05	2.93	-1.47	1.47
THBS1	P07996	2.95928e-05	2.38e-10	2.01	-1.01	1.01
TMEM40	Q8WWA1	0.00113527	0.019	1.41	-0.705	0.705
TRAP1	Q12931	0.000639993	0.00444	-1.07	0.535	-0.535
TRIM21	P19474	0.000223072	0.00011	2.84	-1.42	1.42
UBE2L6	O14933	0.00118939	0.0211	3.36	-1.68	1.68
XRCC3	O43542	5.61322e-06	2.28e-14	-5.4	2.7	-2.7
2024-09-02	Q15019	0.638399	0.948	0.184	-0.0922	0.0922
2024-09-07	Q16181	0.450311	0.939	0.0898	-0.0449	0.0449
2024-09-09	Q9UHD8	0.382064	0.934	0.135	-0.0675	0.0675
2024-09-11	Q9NVA2	0.194944	0.909	-1.2	0.601	-0.601
2024-09-15	O60613	0.265125	0.922	-0.24	0.12	-0.12
A0A0U1RQI7	A0A0U1RQI7	0.0127781	0.539	-2.05	1.02	-1.02
A1CF	Q9NQ94	0.0927516	0.865	-0.702	0.351	-0.351
A2M	P01023	0.732172	0.951	0.12	-0.0601	0.0601
AAMP	Q13685	0.170294	0.902	-0.966	0.483	-0.483
AARS	P49588	0.0217223	0.671	-0.429	0.214	-0.214
AARSD1	Q9BTE6	0.0724774	0.845	-1.21	0.606	-0.606
ABCA13	Q86UQ4	0.366484	0.933	-0.185	0.0926	-0.0926
ABCD3	P28288	0.0107613	0.489	-0.672	0.336	-0.336
ABCE1	P61221	0.0530563	0.813	-0.326	0.163	-0.163
ABCF1	Q8NE71	0.669025	0.949	0.0694	-0.0347	0.0347
ABHD10	Q9NUJ1	0.0779386	0.851	-0.818	0.409	-0.409
ABHD3	Q8WU67	0.211865	0.913	0.798	-0.399	0.399
ABHD4	Q8TB40	0.0402709	0.779	-0.921	0.46	-0.46
ABI1	Q8IZP0	0.284436	0.924	0.137	-0.0685	0.0685
ABRACL	Q9P1F3	0.975205	0.958	-0.00676	0.00338	-0.00338
ACAA1	P09110	0.00170317	0.0434	0.799	-0.4	0.4
ACAA2	P42765	0.259537	0.921	0.168	-0.0839	0.0839
ACADL	P28330	0.0123186	0.529	-0.447	0.223	-0.223
ACADVL	P49748	0.0993036	0.87	0.284	-0.142	0.142
ACAT1	P24752	0.698107	0.95	-0.107	0.0537	-0.0537
ACAT2	Q9BWD1	0.482485	0.941	-0.0851	0.0425	-0.0425
ACE	P12821	0.363424	0.933	0.204	-0.102	0.102
ACLY	P53396	0.0792951	0.853	-0.335	0.167	-0.167
ACO2	Q99798	0.403822	0.936	-0.227	0.113	-0.113
ACOT13	Q9NPJ3	0.139734	0.892	0.265	-0.132	0.132
ACOT7	O00154	0.587567	0.946	-0.094	0.047	-0.047
ACOT7L	Q6ZUV0	0.271067	0.922	1.3	-0.648	0.648
ACOT9	Q9Y305	0.677567	0.95	0.151	-0.0754	0.0754
ACP1	P24666	0.9374	0.957	0.0131	-0.00657	0.00657
ACP5	P13686	0.134395	0.89	0.221	-0.111	0.111
ACPT	Q9BZG2	0.151866	0.896	0.461	-0.23	0.23
ACSL3	O95573	0.120446	0.883	0.699	-0.349	0.349
ACTB	P60709	0.0785689	0.852	1	-0.5	0.5
ACTC1	P68032	0.0280025	0.721	-5.24	2.62	-2.62
ACTG1	P63261	0.129109	0.887	0.203	-0.102	0.102
ACTL6A	O96019	0.0959131	0.868	-0.236	0.118	-0.118
ACTN1	P12814	0.0623584	0.83	0.319	-0.16	0.16
ACTN4	O43707	0.221639	0.914	0.863	-0.432	0.432
ACTR10	Q9NZ32	0.0869075	0.86	0.361	-0.18	0.18
ACTR1A	P61163	0.209409	0.912	0.228	-0.114	0.114
ACTR2	P61160	0.272201	0.923	-0.169	0.0845	-0.0845
ACTR3	P61158	0.859267	0.955	0.0519	-0.0259	0.0259
ADAMTS10	Q9H324	0.692927	0.95	-0.592	0.296	-0.296
ADAR	P55265	0.0262671	0.709	0.599	-0.299	0.299
ADCK4	Q96D53	0.563339	0.945	0.471	-0.236	0.236
ADCY6	O43306	0.836687	0.955	-0.0284	0.0142	-0.0142
ADH5	P11766	0.53279	0.944	-0.0968	0.0484	-0.0484
ADK	P55263	0.754964	0.952	0.0424	-0.0212	0.0212
ADM	P35318	0.0484967	0.803	2.63	-1.31	1.31
ADPRHL2	Q9NX46	0.408582	0.936	0.505	-0.252	0.252
ADRM1	Q16186	0.183724	0.906	-0.195	0.0973	-0.0973
ADSL	P30566	0.167673	0.902	-0.263	0.132	-0.132
ADSS	P30520	0.324481	0.929	-0.428	0.214	-0.214
AGPS	O00116	0.0218634	0.672	1.04	-0.519	0.519
AGR2	O95994	0.746172	0.952	0.102	-0.0512	0.0512
AHCY	P23526	0.429157	0.938	-0.137	0.0685	-0.0685
AHCYL2	Q96HN2	0.253408	0.92	-0.135	0.0675	-0.0675
AHDC1	Q5TGY3	0.6434	0.948	-0.346	0.173	-0.173
AHNAK	Q09666	0.0203247	0.657	-0.586	0.293	-0.293
AHNAK2	Q8IVF2	0.0376446	0.769	0.364	-0.182	0.182
AHSA1	O95433	0.567289	0.945	0.733	-0.366	0.366
AIFM1	O95831	0.425028	0.937	-0.164	0.0821	-0.0821
AIMP1	Q12904	0.533091	0.944	0.399	-0.199	0.199
AIMP2	Q13155	0.0100719	0.469	-0.447	0.223	-0.223
AJUBA	Q96IF1	0.394024	0.935	-1.17	0.585	-0.585
AK1	P00568	0.97611	0.958	-0.00822	0.00411	-0.00411
AK2	P54819	0.00845536	0.414	-0.532	0.266	-0.266
AK3	Q9UIJ7	0.164753	0.901	0.674	-0.337	0.337
AK4	P27144	0.30997	0.927	-0.138	0.0688	-0.0688
AK8	Q96MA6	0.0828712	0.856	0.378	-0.189	0.189
AKR1A1	P14550	0.192316	0.908	-0.213	0.106	-0.106
AKR1B1	P15121	0.108395	0.876	-0.264	0.132	-0.132
ALB	P02768	0.802225	0.954	-0.747	0.374	-0.374
ALCAM	Q13740	0.0165773	0.608	0.53	-0.265	0.265
ALDH18A1	P54886	0.0539392	0.815	-0.318	0.159	-0.159
ALDH1A3	P47895	0.76496	0.952	-0.078	0.039	-0.039
ALDH3A2	P51648	0.199479	0.91	-1.13	0.567	-0.567
ALDH7A1	P49419	0.0715381	0.844	2.44	-1.22	1.22
ALDH9A1	P49189	0.658733	0.949	0.0869	-0.0434	0.0434
ALDOA	P04075	0.329558	0.929	0.198	-0.099	0.099
ALDOC	P09972	0.368563	0.933	-1.22	0.61	-0.61
ALG8	Q9BVK2	0.415822	0.937	0.93	-0.465	0.465
ALOX15B	O15296	0.0711325	0.843	2.84	-1.42	1.42
ALYREF	Q86V81	0.362584	0.932	0.122	-0.0608	0.0608
AMOT	Q4VCS5	0.121584	0.884	-0.325	0.162	-0.162
ANGEL1	Q9UNK9	0.23363	0.917	0.27	-0.135	0.135
ANKRD26	Q9UPS8	0.899144	0.956	-0.0208	0.0104	-0.0104
ANKRD31	Q8N7Z5	0.113776	0.879	3.71	-1.86	1.86
ANKRD32	Q9BQI6	0.309774	0.927	-1.62	0.812	-0.812
ANKS1B	Q7Z6G8	0.165063	0.901	-0.624	0.312	-0.312
ANP32A	P39687	0.518002	0.943	0.16	-0.0799	0.0799
ANP32B	Q92688	0.00453531	0.224	-0.637	0.318	-0.318
ANP32E	Q9BTT0	0.628414	0.948	0.132	-0.066	0.066
ANTXRL	A6NF34	0.28685	0.925	-0.482	0.241	-0.241
ANXA1	P04083	0.343601	0.931	-1.29	0.645	-0.645
ANXA11	P50995	0.345275	0.931	0.946	-0.473	0.473
ANXA2	P07355	0.555355	0.945	0.0727	-0.0363	0.0363
ANXA3	P12429	0.00288764	0.117	0.621	-0.311	0.311
ANXA5	P08758	0.344722	0.931	0.132	-0.0662	0.0662
ANXA7	P20073	0.0482698	0.802	0.307	-0.153	0.153
ANXA8L2	Q5VT79	0.0907485	0.863	0.336	-0.168	0.168
AP1B1	Q10567	0.192226	0.908	0.363	-0.182	0.182
AP1G1	O43747	0.789785	0.953	-0.0381	0.019	-0.019
AP1G2	O75843	0.0331089	0.749	0.499	-0.25	0.25
AP1M2	Q9Y6Q5	0.0568099	0.821	0.392	-0.196	0.196
AP2A1	O95782	0.435676	0.938	0.107	-0.0537	0.0537
AP2A2	O94973	0.0669496	0.837	0.482	-0.241	0.241
AP2B1	P63010	0.916562	0.957	0.0145	-0.00726	0.00726
AP2M1	Q96CW1	0.0113612	0.505	0.46	-0.23	0.23
AP2S1	P53680	0.425754	0.937	-0.573	0.287	-0.287
APEH	P13798	0.198609	0.91	0.523	-0.261	0.261
APEX1	P27695	0.0051207	0.259	-0.638	0.319	-0.319
API5	Q9BZZ5	0.00144905	0.0317	-0.781	0.391	-0.391
APMAP	Q9HDC9	0.529894	0.943	-0.0907	0.0453	-0.0453
APOA1BP	Q8NCW5	0.547048	0.944	-0.899	0.45	-0.45
APPL2	Q8NEU8	0.224446	0.915	-0.615	0.308	-0.308
APRT	P07741	0.880991	0.956	-0.0177	0.00884	-0.00884
ARCN1	P48444	0.396919	0.935	0.15	-0.0751	0.0751
ARF3;ARF1	P61204;P84077	0.555153	0.945	-0.128	0.0639	-0.0639
ARF4	P18085	0.0672874	0.838	0.442	-0.221	0.221
ARF6	P62330	0.0703808	0.842	-0.878	0.439	-0.439
ARFGAP2	Q8N6H7	0.0842105	0.858	0.356	-0.178	0.178
ARHGAP1	Q07960	0.0485983	0.803	0.475	-0.237	0.237
ARHGDIA	P52565	0.241443	0.918	0.205	-0.102	0.102
ARHGDIB	P52566	0.0350699	0.758	-0.294	0.147	-0.147
ARID3A	Q99856	0.704761	0.951	-0.0565	0.0283	-0.0283
ARL1	P40616	0.669706	0.949	-0.256	0.128	-0.128
ARL6IP5	O75915	0.0596059	0.826	0.375	-0.188	0.188
ARL8B	Q9NVJ2	0.0275776	0.718	0.455	-0.227	0.227
ARMC8	Q8IUR7	0.573304	0.945	0.0757	-0.0379	0.0379
ARMCX6	Q7L4S7	0.22996	0.916	0.764	-0.382	0.382
ARPC1A	Q92747	0.458791	0.939	0.284	-0.142	0.142
ARPC1B	O15143	0.0565263	0.82	0.439	-0.22	0.22
ARPC2	O15144	0.140286	0.892	-0.208	0.104	-0.104
ARPC3	O15145	0.381485	0.934	0.375	-0.188	0.188
ARPC4	P59998	0.172982	0.903	-1.51	0.754	-0.754
ARPC5	O15511	0.973229	0.958	0.0486	-0.0243	0.0243
ARPC5L	Q9BPX5	0.463929	0.94	0.846	-0.423	0.423
ART4	Q93070	0.140746	0.892	0.429	-0.215	0.215
ASF1A	Q9Y294	0.272837	0.923	-0.33	0.165	-0.165
ASNA1	O43681	0.667195	0.949	-0.055	0.0275	-0.0275
ASS1	P00966	0.452799	0.939	0.167	-0.0833	0.0833
ATF7IP	Q6VMQ6	0.0314547	0.741	0.928	-0.464	0.464
ATG3	Q9NT62	0.441254	0.938	-0.144	0.072	-0.072
ATIC	P31939	0.0684016	0.839	-0.252	0.126	-0.126
ATL3	Q6DD88	0.51131	0.942	0.0801	-0.0401	0.0401
ATOX1	O00244	0.41392	0.937	0.171	-0.0855	0.0855
ATP1A1	P05023	0.300925	0.926	-0.303	0.152	-0.152
ATP1B3	P54709	0.348083	0.931	1.21	-0.604	0.604
ATP2A2	P16615	0.420436	0.937	0.116	-0.0579	0.0579
ATP5A1	P25705	0.396259	0.935	-0.132	0.0661	-0.0661
ATP5B	P06576	0.266644	0.922	-0.19	0.0949	-0.0949
ATP5C1	P36542	0.13341	0.889	1.32	-0.662	0.662
ATP5F1	P24539	0.489589	0.941	-0.144	0.0721	-0.0721
ATP5H	O75947	0.626692	0.948	-0.417	0.209	-0.209
ATP5L	O75964	0.363146	0.932	-0.149	0.0743	-0.0743
ATP5O	P48047	0.866761	0.955	-0.0311	0.0156	-0.0156
ATP6V1A	P38606	0.464873	0.94	-0.0904	0.0452	-0.0452
ATP6V1B2	P21281	0.907789	0.956	-0.017	0.00852	-0.00852
ATP6V1E1	P36543	0.626979	0.948	0.127	-0.0636	0.0636
ATP6V1G1	O75348	0.263611	0.921	2.51	-1.25	1.25
ATP6V1H	Q9UI12	0.482927	0.941	-0.395	0.198	-0.198
ATXN10	Q9UBB4	0.119438	0.883	0.732	-0.366	0.366
ATXN2	Q99700	0.515224	0.943	-0.347	0.174	-0.174
AZIN1	O14977	0.0312193	0.74	0.815	-0.408	0.408
B2M	P61769	0.00453636	0.224	2.23	-1.12	1.12
B3GNTL1	Q67FW5	0.692748	0.95	0.0689	-0.0344	0.0344
B4GALT6	Q9UBX8	0.5826	0.946	0.219	-0.11	0.11
BAG2	O95816	0.545922	0.944	-0.165	0.0825	-0.0825
BAG3	O95817	0.260116	0.921	0.203	-0.101	0.101
BAG6	P46379	0.61226	0.947	-0.15	0.0748	-0.0748
BAIAP2	Q9UQB8	0.115256	0.88	0.363	-0.182	0.182
BBC3	Q96PG8	0.478354	0.941	0.759	-0.38	0.38
BBS1	Q8NFJ9	0.0716613	0.844	-0.375	0.188	-0.188
BCAP31	P51572	0.532326	0.944	-0.649	0.324	-0.324
BCAS2	O75934	0.021764	0.671	-0.439	0.219	-0.219
BCCIP	Q9P287	0.0058397	0.298	-0.743	0.371	-0.371
BGN	P21810	0.379757	0.934	-0.187	0.0937	-0.0937
BID	P55957	0.0649852	0.835	-0.517	0.259	-0.259
BLVRA	P53004	0.0253223	0.702	0.94	-0.47	0.47
BLVRB	P30043	0.0226543	0.68	0.539	-0.269	0.269
BOLA2	Q9H3K6	0.952916	0.957	0.0139	-0.00697	0.00697
BPNT1	O95861	0.386519	0.934	-0.136	0.0678	-0.0678
BRSK1	Q8TDC3	0.70691	0.951	-0.0838	0.0419	-0.0419
BRWD1	Q9NSI6	0.286641	0.924	-1.51	0.756	-0.756
BSDC1	Q9NW68	0.0193443	0.645	-2.05	1.02	-1.02
BSG	P35613	0.256324	0.92	0.296	-0.148	0.148
BTAF1	O14981	0.338006	0.93	0.285	-0.143	0.143
BTF3	P20290	0.0158061	0.596	-0.548	0.274	-0.274
BTF3L4	Q96K17	0.000947956	0.0124	-0.701	0.35	-0.35
BUB1	O43683	0.0688073	0.84	0.483	-0.241	0.241
BUB3	O43684	0.710602	0.951	0.0577	-0.0288	0.0288
BZW1	Q7L1Q6	0.0131753	0.548	-0.627	0.314	-0.314
BZW2	Q9Y6E2	0.0200886	0.654	-0.654	0.327	-0.327
C12orf10	Q9HB07	0.0892778	0.862	-0.213	0.107	-0.107
C14orf159	Q7Z3D6	0.173071	0.903	1.1	-0.552	0.552
C14orf166	Q9Y224	0.00299858	0.125	-0.547	0.273	-0.273
C15orf62	A8K5M9	0.399869	0.935	-1.25	0.623	-0.623
C16orf62	Q7Z3J2	0.840456	0.955	-0.0723	0.0362	-0.0362
C1QBP	Q07021	0.0192888	0.645	-0.515	0.257	-0.257
C20orf27	Q9GZN8	0.0648538	0.834	3.87	-1.93	1.93
C2CD4B	A6NLJ0	0.224622	0.915	0.186	-0.0931	0.0931
C2orf16	Q68DN1	0.217008	0.914	0.28	-0.14	0.14
C2orf43	Q9H6V9	0.520464	0.943	0.377	-0.188	0.188
C4A	P0C0L4	0.0302032	0.734	-0.367	0.183	-0.183
C4orf47	A7E2U8	0.628333	0.948	-0.389	0.195	-0.195
C8orf89	P0DMQ9	0.154302	0.897	-1.44	0.718	-0.718
C9orf84	Q5VXU9	0.901306	0.956	-0.119	0.0593	-0.0593
CA2	P00918	0.85042	0.955	0.0981	-0.049	0.049
CAB39	Q9Y376	0.607738	0.947	0.459	-0.23	0.23
CACYBP	Q9HB71	0.257359	0.92	-0.63	0.315	-0.315
CAD	P27708	0.0426615	0.786	-0.41	0.205	-0.205
CALR	P27797	0.0129749	0.543	0.437	-0.219	0.219
CAND1	Q86VP6	0.75168	0.952	-0.0423	0.0212	-0.0212
CANX	P27824	0.447669	0.939	-0.127	0.0635	-0.0635
CAP1	Q01518	0.478468	0.941	0.213	-0.107	0.107
CAPG	P40121	0.00195637	0.0577	0.845	-0.423	0.423
CAPN1	P07384	0.030122	0.734	0.404	-0.202	0.202
CAPN2	P17655	0.451673	0.939	0.171	-0.0855	0.0855
CAPNS1	P04632	0.242061	0.918	0.16	-0.0802	0.0802
CAPNS2	Q96L46	0.545714	0.944	-0.0706	0.0353	-0.0353
CAPRIN1	Q14444	0.0866069	0.86	-0.358	0.179	-0.179
CAPZA1	P52907	0.755258	0.952	-0.299	0.15	-0.15
CAPZB	P47756	0.780721	0.953	0.0476	-0.0238	0.0238
CARHSP1	Q9Y2V2	0.474662	0.94	-0.327	0.163	-0.163
CARM1	Q86X55	0.774143	0.953	0.0872	-0.0436	0.0436
CARS	P49589	0.00359835	0.164	0.56	-0.28	0.28
CAST	P20810	0.322724	0.929	0.183	-0.0913	0.0913
CAT	P04040	0.665996	0.949	0.126	-0.0632	0.0632
CAV1	Q03135	0.0576615	0.822	1.63	-0.817	0.817
CBX3	Q13185	0.13897	0.892	-0.238	0.119	-0.119
CCAR2	Q8N163	0.944576	0.957	0.00902	-0.00451	0.00451
CCDC124	Q96CT7	0.394325	0.935	-0.186	0.093	-0.093
CCDC155	Q8N6L0	0.659073	0.949	0.347	-0.174	0.174
CCDC47	Q96A33	0.0980426	0.869	-0.311	0.155	-0.155
CCDC58	Q4VC31	0.0243219	0.694	-0.447	0.224	-0.224
CCDC77	Q9BR77	0.154016	0.897	-0.262	0.131	-0.131
CCT2	P78371	0.252107	0.92	-0.189	0.0944	-0.0944
CCT3	P49368	0.84533	0.955	-0.0287	0.0144	-0.0144
CCT4	P50991	0.0702645	0.842	-0.282	0.141	-0.141
CCT5	P48643	0.0756155	0.848	-0.303	0.152	-0.152
CCT6A	P40227	0.774872	0.953	-0.0434	0.0217	-0.0217
CCT7	Q99832	0.189063	0.907	-0.266	0.133	-0.133
CCT8	P50990	0.637189	0.948	-0.0689	0.0345	-0.0345
CD44	P16070	0.716614	0.951	-0.083	0.0415	-0.0415
CD82	P27701	0.0135618	0.556	0.814	-0.407	0.407
CD9	P21926	0.329059	0.929	0.823	-0.411	0.411
CDC37	Q16543	0.983498	0.958	0.00487	-0.00243	0.00243
CDC42	P60953	0.276781	0.923	1.17	-0.584	0.584
CDC6	Q99741	0.709084	0.951	-0.252	0.126	-0.126
CDH1	P12830	0.157225	0.898	0.249	-0.125	0.125
CDH12	P55289	0.259857	0.921	-1.07	0.537	-0.537
CDH24	Q86UP0	0.840848	0.955	-0.122	0.0612	-0.0612
CDH3	P22223	0.430557	0.938	0.249	-0.125	0.125
CDK1	P06493	0.186536	0.907	-0.524	0.262	-0.262
CDK5RAP3	Q96JB5	0.15514	0.898	0.857	-0.429	0.429
CDV3	Q9UKY7	0.719867	0.951	-0.337	0.169	-0.169
CEP290	O15078	0.0767215	0.85	0.431	-0.216	0.216
CETP	P11597	0.349819	0.931	0.806	-0.403	0.403
CFL1	P23528	0.322247	0.929	-0.172	0.0861	-0.0861
CFL2	Q9Y281	0.0576017	0.822	0.558	-0.279	0.279
CHCHD2P9	Q5T1J5	0.179645	0.905	1.57	-0.787	0.787
CHGB	P05060	0.216241	0.913	0.949	-0.475	0.475
CHMP1A	Q9HD42	0.22383	0.915	-1.54	0.768	-0.768
CHMP4B	Q9H444	0.561509	0.945	-0.102	0.0512	-0.0512
CHORDC1	Q9UHD1	0.052039	0.811	-0.493	0.247	-0.247
CHP1	Q99653	0.113904	0.879	0.499	-0.249	0.249
CIAPIN1	Q6FI81	0.50954	0.942	-0.148	0.074	-0.074
CKAP4	Q07065	0.023835	0.69	0.441	-0.22	0.22
CKMT1A	P12532	0.240909	0.918	-0.211	0.106	-0.106
CLIC1	O00299	0.0816539	0.855	0.42	-0.21	0.21
CLIC4	Q9Y696	0.255508	0.92	0.261	-0.13	0.13
CLINT1	Q14677	0.92873	0.957	-0.0952	0.0476	-0.0476
CLPP	Q16740	0.516302	0.943	0.395	-0.198	0.198
CLPX	O76031	0.262339	0.921	-0.742	0.371	-0.371
CLTB	P09497	0.271257	0.922	0.312	-0.156	0.156
CLTC	Q00610	0.293435	0.925	0.232	-0.116	0.116
CLUH	O75153	0.152368	0.897	-0.232	0.116	-0.116
CMPK1	P30085	0.245158	0.919	-1.48	0.738	-0.738
CMPK2	Q5EBM0	0.019209	0.644	3.16	-1.58	1.58
CNDP2	Q96KP4	0.0443885	0.792	0.548	-0.274	0.274
CNN2	Q99439	0.883042	0.956	-0.0197	0.00984	-0.00984
CNN3	Q15417	0.0599618	0.826	0.297	-0.149	0.149
CNOT1	A5YKK6	0.00943492	0.449	-0.598	0.299	-0.299
CNP	P09543	0.229502	0.916	0.203	-0.101	0.101
CNPY2	Q9Y2B0	0.35729	0.932	-0.317	0.158	-0.158
CNPY3	Q9BT09	0.951162	0.957	0.00834	-0.00417	0.00417
COASY	Q13057	0.167604	0.902	-0.208	0.104	-0.104
COG3	Q96JB2	0.740985	0.952	-0.0745	0.0372	-0.0372
COL10A1	Q03692	0.15356	0.897	-0.972	0.486	-0.486
COL17A1	Q9UMD9	0.00424594	0.206	0.542	-0.271	0.271
COMMD3	Q9UBI1	0.143176	0.893	-1.42	0.709	-0.709
COMMD9	Q9P000	0.173896	0.903	0.286	-0.143	0.143
COMT	P21964	0.424474	0.937	0.13	-0.0651	0.0651
COPA	P53621	0.0942303	0.866	0.241	-0.12	0.12
COPB1	P53618	0.0957697	0.867	0.355	-0.177	0.177
COPB2	P35606	0.046635	0.798	0.273	-0.137	0.137
COPE	O14579	0.114013	0.88	0.251	-0.126	0.126
COPG1	Q9Y678	0.0394752	0.776	0.404	-0.202	0.202
COPS2	P61201	0.223095	0.915	-1.86	0.928	-0.928
COPS3	Q9UNS2	0.24542	0.919	1.02	-0.509	0.509
COPS4	Q9BT78	0.363121	0.932	0.129	-0.0644	0.0644
COPS6	Q7L5N1	0.648928	0.949	-0.0729	0.0364	-0.0364
COPS7A	Q9UBW8	0.435292	0.938	0.317	-0.158	0.158
COPS8	Q99627	0.029814	0.732	-0.504	0.252	-0.252
COPZ1	P61923	0.582431	0.946	-0.0877	0.0439	-0.0439
CORIN	Q9Y5Q5	0.266309	0.922	0.793	-0.396	0.396
CORO1B	Q9BR76	0.0548172	0.817	0.507	-0.253	0.253
CORO1C	Q9ULV4	0.342174	0.931	0.306	-0.153	0.153
CORO7	P57737	0.981447	0.958	-0.00599	0.00299	-0.00299
COTL1	Q14019	0.0769859	0.85	-0.346	0.173	-0.173
COX15	Q7KZN9	0.197485	0.909	-0.652	0.326	-0.326
COX4I1	P13073	0.403851	0.936	0.726	-0.363	0.363
COX5A	P20674	0.00267158	0.103	-0.809	0.405	-0.405
CPD	O75976	0.451814	0.939	1.17	-0.587	0.587
CPNE1	Q99829	0.0801841	0.854	0.261	-0.131	0.131
CPNE3	O75131	0.06962	0.841	-0.39	0.195	-0.195
CPOX	P36551	0.0587223	0.824	0.567	-0.283	0.283
CPSF6	Q16630	0.170924	0.903	-0.173	0.0866	-0.0866
CPT2	P23786	0.349002	0.931	0.308	-0.154	0.154
CPXCR1	Q8N123	0.332412	0.93	-0.927	0.464	-0.464
CRABP2	P29373	0.158945	0.899	-2.3	1.15	-1.15
CRAMP1L	Q96RY5	0.315963	0.928	-0.903	0.451	-0.451
CRK	P46108	0.594476	0.946	0.116	-0.0578	0.0578
CRKL	P46109	0.693428	0.95	-0.0714	0.0357	-0.0357
CROCC	Q5TZA2	0.711732	0.951	-0.128	0.0638	-0.0638
CRY1	Q16526	0.808716	0.954	-0.203	0.102	-0.102
CRYBG3	Q68DQ2	0.137882	0.891	1.67	-0.835	0.835
CRYZ	Q08257	0.958511	0.958	-0.046	0.023	-0.023
CS	O75390	0.0134714	0.554	-0.431	0.216	-0.216
CSDE1	O75534	0.00399749	0.19	-0.61	0.305	-0.305
CSE1L	P55060	0.0479824	0.801	-0.462	0.231	-0.231
CSK	P41240	0.353299	0.932	1.21	-0.606	0.606
CSMD2	Q7Z408	0.0101776	0.472	0.435	-0.218	0.218
CSNK1A1	P48729	0.793025	0.953	-0.0521	0.0261	-0.0261
CSNK1E	P49674	0.279737	0.924	-0.365	0.182	-0.182
CSNK2A1	P68400	0.240997	0.918	-0.21	0.105	-0.105
CSNK2B	P67870	0.440776	0.938	0.264	-0.132	0.132
CSRP1	P21291	0.203633	0.911	1.21	-0.604	0.604
CSTB	P04080	0.431031	0.938	-0.612	0.306	-0.306
CSTF1	Q05048	0.652626	0.949	-0.0809	0.0404	-0.0404
CSTF2	P33240	0.00537288	0.273	-0.522	0.261	-0.261
CTNNA1	P35221	0.0400496	0.778	0.379	-0.189	0.189
CTNNA2	P26232	0.0484795	0.803	-0.837	0.419	-0.419
CTNNB1	P35222	0.168026	0.902	0.214	-0.107	0.107
CTNND1	O60716	0.417476	0.937	0.218	-0.109	0.109
CTPS1	P17812	0.235724	0.917	-0.205	0.103	-0.103
CTSA	P10619	0.384938	0.934	-1.8	0.898	-0.898
CTSB	P07858	0.0895062	0.862	1.08	-0.542	0.542
CTSD	P07339	0.367991	0.933	0.151	-0.0757	0.0757
CTSE	P14091	0.198416	0.91	0.423	-0.212	0.212
CTTN	Q14247	0.503517	0.942	0.175	-0.0877	0.0877
CUL3	Q13618	0.223577	0.915	0.271	-0.136	0.136
CUL9	Q8IWT3	0.886286	0.956	-0.106	0.0529	-0.0529
CUX2	O14529	0.140309	0.892	2.01	-1	1
CWF19L2	Q2TBE0	0.453892	0.939	0.125	-0.0624	0.0624
CX3CL1	P78423	0.0201209	0.654	0.579	-0.289	0.289
CXADR	P78310	0.0647586	0.834	-2.56	1.28	-1.28
CYB5R3	P00387	0.160236	0.899	1.21	-0.603	0.603
CYCS	P99999	0.967334	0.958	0.00862	-0.00431	0.00431
CYP2A6	P11509	0.63502	0.948	0.313	-0.157	0.157
CYP4A22	Q5TCH4	0.961057	0.958	-0.0108	0.00541	-0.00541
CYR61	O00622	0.0746434	0.847	0.59	-0.295	0.295
DARS	P14868	0.777777	0.953	0.0454	-0.0227	0.0227
DARS2	Q6PI48	0.346473	0.931	-0.169	0.0843	-0.0843
DAZAP1	Q96EP5	0.965935	0.958	-0.0438	0.0219	-0.0219
DBNL	Q9UJU6	0.621231	0.947	-0.245	0.122	-0.122
DCHS2	Q6V1P9	0.563333	0.945	-0.717	0.359	-0.359
DCPS	Q96C86	0.500141	0.942	-0.99	0.495	-0.495
DCTN1	Q14203	0.514527	0.943	0.109	-0.0543	0.0543
DCTN2	Q13561	0.0309984	0.739	0.741	-0.37	0.37
DCTN3	O75935	0.68956	0.95	0.144	-0.072	0.072
DCTPP1	Q9H773	0.565206	0.945	0.19	-0.0951	0.0951
DCUN1D1	Q96GG9	0.345971	0.931	-0.828	0.414	-0.414
DDAH1	O94760	0.486661	0.941	0.0893	-0.0446	0.0446
DDB1	Q16531	0.0403337	0.779	-0.362	0.181	-0.181
DDOST	P39656	0.121155	0.883	-0.22	0.11	-0.11
DDRGK1	Q96HY6	0.315826	0.928	0.157	-0.0783	0.0783
DDX1	Q92499	0.550208	0.944	-0.0714	0.0357	-0.0357
DDX18	Q9NVP1	0.0315327	0.741	-0.83	0.415	-0.415
DDX19A	Q9NUU7	0.0339967	0.753	-0.357	0.179	-0.179
DDX20	Q9UHI6	0.409473	0.936	-0.121	0.0603	-0.0603
DDX31	Q9H8H2	0.11295	0.879	0.258	-0.129	0.129
DDX39A	O00148	0.835046	0.954	-0.0711	0.0355	-0.0355
DDX39B	Q13838	0.0841642	0.857	-0.465	0.233	-0.233
DDX3X	O00571	0.0604208	0.827	-0.558	0.279	-0.279
DDX5	P17844	0.240613	0.918	-0.183	0.0916	-0.0916
DDX6	P26196	0.00969661	0.457	-0.538	0.269	-0.269
DECR1	Q16698	0.115172	0.88	1.84	-0.921	0.921
DEK	P35659	0.256263	0.92	0.85	-0.425	0.425
DENR	O43583	0.285971	0.924	-0.15	0.0751	-0.0751
DFFA	O00273	0.493647	0.942	0.83	-0.415	0.415
DFNA5	O60443	0.128935	0.887	0.345	-0.173	0.173
DHRS7	Q9Y394	0.0222238	0.676	0.418	-0.209	0.209
DHX15	O43143	0.10561	0.874	-0.342	0.171	-0.171
DHX57	Q6P158	0.195651	0.909	-0.309	0.155	-0.155
DHX9	Q08211	0.354704	0.932	-0.139	0.0696	-0.0696
DIABLO	Q9NR28	0.286924	0.925	-0.172	0.0861	-0.0861
DIAPH1	O60610	0.0257651	0.705	-0.397	0.199	-0.199
DIP2B	Q9P265	0.269401	0.922	0.426	-0.213	0.213
DIS3	Q9Y2L1	0.0451728	0.794	-0.462	0.231	-0.231
DLD	P09622	0.296974	0.926	1.66	-0.829	0.829
DLST	P36957	0.464917	0.94	-0.168	0.0838	-0.0838
DMGDH	Q9UI17	0.295773	0.926	0.606	-0.303	0.303
DNAH12	Q6ZR08	0.767828	0.953	0.0836	-0.0418	0.0418
DNAH3	Q8TD57	0.324898	0.929	-0.394	0.197	-0.197
DNAH7	Q8WXX0	0.246753	0.919	-0.368	0.184	-0.184
DNAJA1	P31689	0.197112	0.909	0.352	-0.176	0.176
DNAJA2	O60884	0.320176	0.928	0.2	-0.1	0.1
DNAJB1	P25685	0.92378	0.957	-0.0225	0.0113	-0.0113
DNAJB11	Q9UBS4	0.549855	0.944	-0.283	0.141	-0.141
DNAJC16	Q9Y2G8	0.0647343	0.834	2.44	-1.22	1.22
DNAJC5	Q9H3Z4	0.173331	0.903	0.489	-0.245	0.245
DNAJC7	Q99615	0.122361	0.884	-0.325	0.162	-0.162
DNAJC9	Q8WXX5	0.0300953	0.733	-0.58	0.29	-0.29
DNM1L	O00429	0.443576	0.939	0.092	-0.046	0.046
DNM2	P50570	0.360199	0.932	0.236	-0.118	0.118
DPH5	Q9H2P9	0.0163196	0.605	-0.739	0.369	-0.369
DPP3	Q9NY33	0.0414282	0.782	0.321	-0.161	0.161
DPP9	Q86TI2	0.0492009	0.804	0.288	-0.144	0.144
DPY30	Q9C005	0.198109	0.91	-1.16	0.579	-0.579
DR1	Q01658	0.407781	0.936	0.686	-0.343	0.343
DRAP1	Q14919	0.567373	0.945	0.298	-0.149	0.149
DRG1	Q9Y295	0.166934	0.901	-0.528	0.264	-0.264
DRG2	P55039	0.523601	0.943	-0.193	0.0963	-0.0963
DSP	P15924	0.207069	0.912	-0.189	0.0944	-0.0944
DTNB	O60941	0.449093	0.939	0.165	-0.0825	0.0825
DTX3L	Q8TDB6	0.024634	0.697	3.47	-1.73	1.73
DTYMK	P23919	0.00339292	0.151	-0.791	0.396	-0.396
DUSP1	P28562	0.789034	0.953	-0.0862	0.0431	-0.0431
DUT	P33316	0.0157259	0.595	-0.816	0.408	-0.408
DYM	Q7RTS9	0.109242	0.877	0.306	-0.153	0.153
DYNC1H1	Q14204	0.197868	0.91	-0.161	0.0804	-0.0804
DYNC1I2	Q13409	0.973877	0.958	0.00571	-0.00285	0.00285
DYNC1LI2	O43237	0.989662	0.958	0.00238	-0.00119	0.00119
DYNLL1	P63167	0.137342	0.891	0.209	-0.104	0.104
DYNLRB1;DYNLRB2	Q9NP97;Q8TF09	0.572161	0.945	0.681	-0.34	0.34
DYNLT1	P63172	0.0572599	0.822	0.516	-0.258	0.258
EAF2	Q96CJ1	0.160046	0.899	0.842	-0.421	0.421
ECH1	Q13011	0.101497	0.872	0.255	-0.127	0.127
ECHDC1	Q9NTX5	0.8339	0.954	-0.0779	0.039	-0.039
ECHS1	P30084	0.47335	0.94	0.132	-0.066	0.066
ECM29	Q5VYK3	0.985269	0.958	-0.00236	0.00118	-0.00118
EDC4	Q6P2E9	0.157479	0.898	-0.354	0.177	-0.177
EDF1	O60869	0.307622	0.927	0.379	-0.189	0.189
EEF1A1;EEF1A1P5	P68104;Q5VTE0	0.143984	0.894	-0.24	0.12	-0.12
EEF1B2	P24534	0.0264889	0.711	-0.405	0.203	-0.203
EEF1D	P29692	0.463225	0.94	-0.146	0.0731	-0.0731
EEF1E1	O43324	0.00456083	0.226	-0.845	0.423	-0.423
EEF1G	P26641	0.0312057	0.74	-0.303	0.152	-0.152
EEF2	P13639	0.130269	0.888	-0.279	0.14	-0.14
EEFSEC	P57772	0.388387	0.935	0.17	-0.0848	0.0848
EFHD2	Q96C19	0.293102	0.925	-0.159	0.0795	-0.0795
EFTUD2	Q15029	0.0743692	0.847	-0.503	0.252	-0.252
EGFR	P00533	0.839604	0.955	0.0327	-0.0163	0.0163
EHD1	Q9H4M9	0.826751	0.954	0.0248	-0.0124	0.0124
EHD4	Q9H223	0.0646861	0.834	0.419	-0.21	0.21
EIF1	P41567	0.267001	0.922	-0.237	0.118	-0.118
EIF1AY	O14602	0.765578	0.953	0.172	-0.086	0.086
EIF2A	Q9BY44	0.118516	0.882	-0.234	0.117	-0.117
EIF2B1	Q14232	0.302818	0.926	0.238	-0.119	0.119
EIF2B2	P49770	0.80385	0.954	-0.216	0.108	-0.108
EIF2S1	P05198	0.578609	0.946	0.297	-0.148	0.148
EIF2S2	P20042	0.749604	0.952	-0.0494	0.0247	-0.0247
EIF2S3	P41091	0.205515	0.911	-0.16	0.0798	-0.0798
EIF3A	Q14152	0.562546	0.945	-0.074	0.037	-0.037
EIF3B	P55884	0.268418	0.922	-0.218	0.109	-0.109
EIF3C;EIF3CL	Q99613;B5ME19	0.202667	0.911	-0.157	0.0787	-0.0787
EIF3D	O15371	0.408374	0.936	-0.0958	0.0479	-0.0479
EIF3E	P60228	0.776584	0.953	-0.0332	0.0166	-0.0166
EIF3F	O00303	0.259787	0.921	-0.148	0.0742	-0.0742
EIF3G	O75821	0.02535	0.702	-0.442	0.221	-0.221
EIF3H	O15372	0.404879	0.936	-0.148	0.0741	-0.0741
EIF3I	Q13347	0.463619	0.94	-0.246	0.123	-0.123
EIF3J	O75822	0.322929	0.929	-0.174	0.0869	-0.0869
EIF3K	Q9UBQ5	0.795149	0.953	0.192	-0.0961	0.0961
EIF3L	Q9Y262	0.203739	0.911	-0.169	0.0844	-0.0844
EIF3M	Q7L2H7	0.969138	0.958	0.00962	-0.00481	0.00481
EIF4A1	P60842	0.0689853	0.84	-0.331	0.166	-0.166
EIF4A2	Q14240	0.656388	0.949	0.094	-0.047	0.047
EIF4A3	P38919	0.0271458	0.715	-0.425	0.212	-0.212
EIF4B	P23588	0.00535279	0.272	-0.614	0.307	-0.307
EIF4G1	Q04637	0.031295	0.74	-0.327	0.163	-0.163
EIF4G2	P78344	0.515604	0.943	-0.0934	0.0467	-0.0467
EIF4H	Q15056	0.0802684	0.854	-0.316	0.158	-0.158
EIF5	P55010	0.646505	0.948	-0.162	0.0812	-0.0812
EIF5A	P63241	0.142758	0.893	-0.187	0.0936	-0.0936
EIF5B	O60841	0.099996	0.871	-0.342	0.171	-0.171
EIF6	P56537	0.529111	0.943	0.0869	-0.0435	0.0435
ELAVL1	Q15717	0.0126855	0.537	-0.466	0.233	-0.233
ELOVL5	Q9NYP7	0.549078	0.944	0.396	-0.198	0.198
EMC7	Q9NPA0	0.225909	0.915	-0.185	0.0923	-0.0923
EMD	P50402	0.0957309	0.867	-0.484	0.242	-0.242
EMG1	Q92979	0.391507	0.935	0.12	-0.06	0.06
ENO1	P06733	0.617902	0.947	-0.0686	0.0343	-0.0343
ENOPH1	Q9UHY7	0.0463872	0.797	-0.846	0.423	-0.423
EOMES	O95936	0.0703749	0.842	0.494	-0.247	0.247
EPCAM	P16422	0.754237	0.952	-0.282	0.141	-0.141
EPG5	Q9HCE0	0.100225	0.871	1.33	-0.663	0.663
EPHA2	P29317	0.125056	0.885	0.305	-0.153	0.153
EPRS	P07814	0.0363619	0.764	-0.432	0.216	-0.216
ERAL1	O75616	0.502257	0.942	1.24	-0.62	0.62
ERICH3	Q5RHP9	0.806381	0.954	0.032	-0.016	0.016
ERO1L	Q96HE7	0.777322	0.953	0.0749	-0.0375	0.0375
ERP29	P30040	0.504139	0.942	-0.119	0.0593	-0.0593
ERP44	Q9BS26	0.153059	0.897	0.202	-0.101	0.101
ERV3-1	Q14264	0.105473	0.874	-0.51	0.255	-0.255
ERVFC1	P60507	0.249178	0.919	-0.407	0.204	-0.204
ERVK-7	P61567	0.286105	0.924	-0.568	0.284	-0.284
ESD	P10768	0.0151171	0.585	-0.449	0.225	-0.225
ESF1	Q9H501	0.259467	0.921	-0.467	0.234	-0.234
ESYT1	Q9BSJ8	0.275241	0.923	0.145	-0.0727	0.0727
ETF1	P62495	0.0192163	0.644	-0.428	0.214	-0.214
ETFA	P13804	0.529588	0.943	-0.084	0.042	-0.042
ETFB	P38117	0.367219	0.933	-0.137	0.0687	-0.0687
EVC	P57679	0.915966	0.957	0.131	-0.0653	0.0653
EVC2	Q86UK5	0.301441	0.926	-0.537	0.269	-0.269
EXOSC2	Q13868	0.200128	0.91	-0.321	0.16	-0.16
EXOSC5	Q9NQT4	0.330611	0.929	0.719	-0.359	0.359
EZR	P15311	0.132036	0.889	0.29	-0.145	0.145
F11R	Q9Y624	0.0974563	0.869	-0.365	0.183	-0.183
FABP5	Q01469	0.202042	0.91	-1.21	0.605	-0.605
FADD	Q13158	0.166927	0.901	-0.234	0.117	-0.117
FADS3	Q9Y5Q0	0.0243311	0.694	0.465	-0.232	0.232
FAF2	Q96CS3	0.906679	0.956	0.0171	-0.00857	0.00857
FAM102B	Q5T8I3	0.105904	0.875	-0.431	0.216	-0.216
FAM129B	Q96TA1	0.264929	0.922	0.226	-0.113	0.113
FAM179B	Q9Y4F4	0.267476	0.922	-2.03	1.01	-1.01
FAM193B	Q96PV7	0.773465	0.953	-0.0352	0.0176	-0.0176
FAM216B	Q8N7L0	0.0279078	0.72	-0.471	0.236	-0.236
FAM228B	P0C875	0.0727838	0.845	0.43	-0.215	0.215
FAM3C	Q92520	0.424119	0.937	0.165	-0.0825	0.0825
FAM49B	Q9NUQ9	0.00666615	0.339	1.12	-0.56	0.56
FAM92A1	A1XBS5	0.230292	0.916	0.831	-0.415	0.415
FAM96B	Q9Y3D0	0.611176	0.947	0.0657	-0.0328	0.0328
FAM98B	Q52LJ0	0.140861	0.892	-0.532	0.266	-0.266
FARSA	Q9Y285	0.931804	0.957	0.0145	-0.00727	0.00727
FARSB	Q9NSD9	0.184442	0.906	-0.281	0.141	-0.141
FASN	P49327	0.0403028	0.779	-0.477	0.238	-0.238
FAT4	Q6V0I7	0.636424	0.948	-0.195	0.0977	-0.0977
FBXL16	Q8N461	0.0534735	0.814	-0.648	0.324	-0.324
FBXL2	Q9UKC9	0.55187	0.944	-0.568	0.284	-0.284
FCRL1	Q96LA6	0.233096	0.917	1.19	-0.594	0.594
FDPS	P14324	0.227082	0.915	-0.186	0.093	-0.093
FDXR	P22570	0.912331	0.956	-0.0254	0.0127	-0.0127
FEN1	P39748	0.480989	0.941	-0.146	0.0732	-0.0732
FER1L6	Q2WGJ9	0.676835	0.95	-0.0765	0.0383	-0.0383
FERMT1	Q9BQL6	0.43375	0.938	0.111	-0.0556	0.0556
FH	P07954	0.0372441	0.767	-0.438	0.219	-0.219
FHOD1	Q9Y613	0.030574	0.736	-0.545	0.273	-0.273
FIS1	Q9Y3D6	0.0125594	0.534	0.697	-0.348	0.348
FKBP10	Q96AY3	0.453932	0.939	-0.251	0.125	-0.125
FKBP2	P26885	0.0164166	0.606	1.97	-0.987	0.987
FKBP3	Q00688	0.161525	0.9	1.19	-0.596	0.596
FKBP4	Q02790	0.24648	0.919	-0.203	0.102	-0.102
FLAD1	Q8NFF5	0.22673	0.915	-0.234	0.117	-0.117
FLII	Q13045	0.127184	0.886	0.267	-0.133	0.133
FLNA	P21333	0.207837	0.912	0.186	-0.0932	0.0932
FLNB	O75369	0.0242491	0.694	0.483	-0.242	0.242
FNDC3B	Q53EP0	0.289586	0.925	1.3	-0.652	0.652
FNTA	P49354	0.121041	0.883	1.31	-0.654	0.654
FPR2	P25090	0.319876	0.928	-0.646	0.323	-0.323
FRMPD4	Q14CM0	0.0246483	0.697	0.432	-0.216	0.216
FSCN1	Q16658	0.734866	0.952	0.0537	-0.0269	0.0269
FSD1	Q9BTV5	0.553303	0.945	0.0803	-0.0402	0.0402
FUBP1	Q96AE4	0.0428477	0.787	-0.299	0.15	-0.15
FUBP3	Q96I24	0.994095	0.958	-0.00208	0.00104	-0.00104
FUS	P35637	0.0222306	0.676	-0.675	0.337	-0.337
FUT11	Q495W5	0.562664	0.945	-0.158	0.0788	-0.0788
FXR1	P51114	0.480508	0.941	0.472	-0.236	0.236
G3BP1	Q13283	0.00185268	0.0517	-0.969	0.485	-0.485
G3BP2	Q9UN86	0.381377	0.934	-0.369	0.184	-0.184
G6PD	P11413	0.378726	0.934	0.151	-0.0755	0.0755
GAA	P10253	0.692325	0.95	-0.0761	0.038	-0.038
GALE	Q14376	0.694202	0.95	-0.0908	0.0454	-0.0454
GANAB	Q14697	0.307338	0.927	1.11	-0.556	0.556
GAPDH	P04406	0.472279	0.94	1.29	-0.645	0.645
GARS	P41250	0.447015	0.939	-0.104	0.052	-0.052
GART	P22102	0.00685033	0.348	-0.503	0.251	-0.251
GBE1	Q04446	0.287882	0.925	0.459	-0.23	0.23
GBF1	Q92538	0.0233792	0.686	0.68	-0.34	0.34
GBP1	P32455	0.058365	0.824	1.12	-0.558	0.558
GC	P02774	0.103774	0.873	0.24	-0.12	0.12
GCLM	P48507	0.377738	0.934	-0.446	0.223	-0.223
GCN1L1	Q92616	0.122096	0.884	-0.204	0.102	-0.102
GDI1	P31150	0.00138973	0.0292	0.659	-0.33	0.33
GDI2	P50395	0.0368739	0.766	-0.386	0.193	-0.193
GEMIN4	P57678	0.878481	0.956	-0.0349	0.0174	-0.0174
GEMIN5	Q8TEQ6	0.0017487	0.0459	-0.663	0.331	-0.331
GFM1	Q96RP9	0.0772069	0.85	-0.311	0.156	-0.156
GFPT1	Q06210	0.0197037	0.65	0.624	-0.312	0.312
GGA3	Q9NZ52	0.319206	0.928	-0.248	0.124	-0.124
GGCT	O75223	0.991934	0.958	0.00321	-0.00161	0.00161
GID8	Q9NWU2	0.616068	0.947	-0.0768	0.0384	-0.0384
GIPC1	O14908	0.472359	0.94	0.147	-0.0734	0.0734
GK;GK3P	P32189;Q14409	0.0233972	0.686	0.597	-0.298	0.298
GLG1	Q92896	0.587775	0.946	-0.29	0.145	-0.145
GLI2	P10070	0.46523	0.94	-0.121	0.0604	-0.0604
GLMN	Q92990	0.0212523	0.666	-0.581	0.29	-0.29
GLO1	Q04760	0.633473	0.948	-0.0929	0.0464	-0.0464
GLOD4	Q9HC38	0.265893	0.922	0.321	-0.16	0.16
GLRX3	O76003	0.935518	0.957	-0.0144	0.00721	-0.00721
GLTP	Q9NZD2	0.148377	0.895	0.54	-0.27	0.27
GLUD1	P00367	0.0160456	0.6	0.493	-0.246	0.246
GLYCTK	Q8IVS8	0.759764	0.952	0.0543	-0.0271	0.0271
GLYR1	Q49A26	0.593456	0.946	-0.893	0.446	-0.446
GM2A	P17900	0.0207597	0.661	0.497	-0.249	0.249
GMFB	P60983	0.142642	0.893	-0.712	0.356	-0.356
GMPS	P49915	0.655129	0.949	0.283	-0.142	0.142
GNB1	P62873	0.365912	0.933	-0.113	0.0563	-0.0563
GNB2	P62879	0.154823	0.898	0.253	-0.126	0.126
GNB2L1	P63244	0.0255237	0.704	-0.423	0.211	-0.211
GNPDA1	P46926	0.174024	0.903	-0.284	0.142	-0.142
GNPNAT1	Q96EK6	0.0467673	0.798	0.411	-0.205	0.205
GNS	P15586	0.267644	0.922	-0.224	0.112	-0.112
GOLGA6L2	Q8N9W4	0.753369	0.952	0.126	-0.0628	0.0628
GOLT1B	Q9Y3E0	0.434331	0.938	0.66	-0.33	0.33
GOSR1	O95249	0.672762	0.949	-0.0544	0.0272	-0.0272
GOT1	P17174	0.300649	0.926	0.474	-0.237	0.237
GOT2	P00505	0.591288	0.946	0.367	-0.184	0.184
GPAA1	O43292	0.055314	0.818	0.786	-0.393	0.393
GPD2	P43304	0.188001	0.907	0.337	-0.168	0.168
GPHN	Q9NQX3	0.435958	0.938	1.1	-0.548	0.548
GPI	P06744	0.832836	0.954	-0.108	0.0538	-0.0538
GPR141	Q7Z602	0.0979311	0.869	-3.01	1.51	-1.51
GPR37	O15354	0.374123	0.933	0.71	-0.355	0.355
GPR98	Q8WXG9	0.139556	0.892	-1.77	0.885	-0.885
GPX1	P07203	0.39512	0.935	-0.518	0.259	-0.259
GRB2	P62993	0.0494649	0.805	0.428	-0.214	0.214
GRHPR	Q9UBQ7	0.03232	0.745	0.315	-0.158	0.158
GRPEL1	Q9HAV7	0.569497	0.945	0.358	-0.179	0.179
GRSF1	Q12849	0.0036359	0.167	-0.64	0.32	-0.32
GSDMB	Q8TAX9	0.278399	0.923	1.49	-0.743	0.743
GSK3A	P49840	0.109239	0.877	0.678	-0.339	0.339
GSN	P06396	0.000370929	0.000785	0.883	-0.441	0.441
GSPT1	P15170	0.258183	0.921	-0.183	0.0915	-0.0915
GSS	P48637	0.830838	0.954	-0.0407	0.0203	-0.0203
GSTO1	P78417	0.221112	0.914	-0.191	0.0954	-0.0954
GSTP1	P09211	0.930137	0.957	0.0122	-0.0061	0.0061
GSTZ1	O43708	0.0551901	0.818	1.35	-0.676	0.676
GTF2F2	P13984	0.800084	0.954	-0.103	0.0517	-0.0517
GTPBP4	Q9BZE4	0.366795	0.933	0.245	-0.122	0.122
GVQW1	Q8N7I0	0.00244697	0.0882	1.84	-0.921	0.921
GYG1	P46976	0.0185952	0.636	-0.605	0.302	-0.302
H3F3A	P84243	0.887962	0.956	-0.056	0.028	-0.028
HACD3	Q9P035	0.57395	0.946	0.0768	-0.0384	0.0384
HADH	Q16836	0.045696	0.795	-0.425	0.212	-0.212
HADHA	P40939	0.821206	0.954	0.0276	-0.0138	0.0138
HADHB	P55084	0.179197	0.905	0.218	-0.109	0.109
HARS	P12081	0.497773	0.942	-0.0888	0.0444	-0.0444
HAT1	O14929	0.0242163	0.693	-0.517	0.259	-0.259
HBA1	P69905	0.277593	0.923	-1.84	0.921	-0.921
HBD	P02042	0.0154286	0.59	-0.475	0.238	-0.238
HCFC1	P51610	0.0305803	0.736	-1.1	0.549	-0.549
HDAC1	Q13547	0.157148	0.898	-0.322	0.161	-0.161
HDGF	P51858	0.357325	0.932	-0.213	0.106	-0.106
HDLBP	Q00341	0.0179149	0.627	0.391	-0.195	0.195
HEXB	P07686	0.80421	0.954	-0.0317	0.0159	-0.0159
HGH1	Q9BTY7	0.930053	0.957	0.0341	-0.0171	0.0171
HID1	Q8IV36	0.330345	0.929	0.19	-0.0951	0.0951
HIF1AN	Q9NWT6	0.790192	0.953	-0.235	0.118	-0.118
HINT1	P49773	0.300228	0.926	-2	1	-1
HIST1H1E	P10412	0.00300423	0.125	2.75	-1.37	1.37
HIST1H2BC;H2BFS;HIST1H2BK;HIST1H2BM;HIST1H2BN;HIST1H2BH;HIST2H2BF;HIST1H2BD;HIST1H2BL;HIST2H2BE;HIST1H2BJ	P62807;P57053;O60814;Q99879;Q99877;Q93079;Q5QNW6;P58876;Q99880;Q16778;P06899;P33778;P23527;Q8N257;Q96A08	0.268192	0.922	-0.251	0.125	-0.125
HIST1H4A	P62805	0.0620248	0.83	-0.247	0.124	-0.124
HK1	P19367	0.71836	0.951	0.0508	-0.0254	0.0254
HK2	P52789	0.406536	0.936	0.122	-0.0608	0.0608
HLA-A	P04439	0.0184817	0.635	2.12	-1.06	1.06
HLA-C	P10321	0.349002	0.931	0.809	-0.405	0.405
HLA-DOB	P13765	0.0368647	0.766	0.362	-0.181	0.181
HMGB1	P09429	0.0561727	0.819	-0.487	0.244	-0.244
HMGB2	P26583	0.14928	0.896	-0.304	0.152	-0.152
HMGB3	O15347	0.324008	0.929	1.04	-0.518	0.518
HMGCS1	Q01581	0.59868	0.947	-0.0675	0.0337	-0.0337
HMOX2	P30519	0.209344	0.912	0.464	-0.232	0.232
HN1	Q9UK76	0.893054	0.956	0.0252	-0.0126	0.0126
HNRNPA0	Q13151	0.72003	0.951	0.188	-0.0942	0.0942
HNRNPA1	P09651	0.190855	0.908	-0.619	0.31	-0.31
HNRNPA2B1	P22626	0.548398	0.944	0.892	-0.446	0.446
HNRNPA3	P51991	0.315157	0.928	1.25	-0.625	0.625
HNRNPAB	Q99729	0.264138	0.921	-0.24	0.12	-0.12
HNRNPC	P07910	0.0150448	0.584	-0.497	0.249	-0.249
HNRNPD	Q14103	0.0276964	0.719	-0.515	0.258	-0.258
HNRNPF	P52597	0.0694542	0.841	-0.357	0.179	-0.179
HNRNPH1	P31943	0.032232	0.745	-0.409	0.205	-0.205
HNRNPH2	P55795	0.0220735	0.674	-1.26	0.632	-0.632
HNRNPH3	P31942	0.501505	0.942	0.456	-0.228	0.228
HNRNPK	P61978	0.654476	0.949	-0.117	0.0584	-0.0584
HNRNPM	P52272	0.902126	0.956	0.0661	-0.033	0.033
HNRNPR	O43390	0.065627	0.835	-0.403	0.202	-0.202
HNRNPU	Q00839	0.877121	0.956	0.0526	-0.0263	0.0263
HOMER2	Q9NSB8	0.811646	0.954	-0.316	0.158	-0.158
HPRT1	P00492	0.335164	0.93	-0.149	0.0747	-0.0747
HPSE	Q9Y251	0.934193	0.957	0.0761	-0.0381	0.0381
HSBP1	O75506	0.122589	0.884	-0.404	0.202	-0.202
HSD17B10	Q99714	0.140639	0.892	-0.312	0.156	-0.156
HSD17B12	Q53GQ0	0.480422	0.941	-0.137	0.0684	-0.0684
HSD17B4	P51659	0.959988	0.958	-0.00664	0.00332	-0.00332
HSDL2	Q6YN16	0.465218	0.94	0.461	-0.231	0.231
HSP90AA1	P07900	0.243025	0.918	-0.17	0.0849	-0.0849
HSP90AB1	P08238	0.404544	0.936	-0.126	0.0629	-0.0629
HSP90AB2P	Q58FF8	0.206384	0.911	-0.236	0.118	-0.118
HSP90B1	P14625	0.698204	0.95	-0.0472	0.0236	-0.0236
HSPA12A	O43301	0.194987	0.909	1.97	-0.984	0.984
HSPA14	Q0VDF9	0.0257494	0.705	-0.496	0.248	-0.248
HSPA1B;HSPA1A	P0DMV9;P0DMV8	0.0574919	0.822	0.421	-0.211	0.211
HSPA4	P34932	0.0598081	0.826	-0.272	0.136	-0.136
HSPA4L	O95757	0.566076	0.945	-0.105	0.0526	-0.0526
HSPA5	P11021	0.207494	0.912	0.26	-0.13	0.13
HSPA8	P11142	0.462293	0.94	1.31	-0.655	0.655
HSPA9	P38646	0.023661	0.689	-0.389	0.194	-0.194
HSPB1	P04792	0.0100832	0.469	0.53	-0.265	0.265
HSPBP1	Q9NZL4	0.352106	0.932	-0.181	0.0907	-0.0907
HSPD1	P10809	0.0289585	0.727	-0.48	0.24	-0.24
HSPE1	P61604	0.368436	0.933	1.44	-0.721	0.721
HSPH1	Q92598	0.860391	0.955	-0.0314	0.0157	-0.0157
HUWE1	Q7Z6Z7	0.784845	0.953	-0.0498	0.0249	-0.0249
HYI	Q5T013	0.312178	0.927	1.04	-0.519	0.519
HYOU1	Q9Y4L1	0.288821	0.925	0.135	-0.0676	0.0676
IARS	P41252	0.045276	0.794	-0.402	0.201	-0.201
IDH1	O75874	0.00402249	0.192	0.671	-0.335	0.335
IDH3A	P50213	0.568159	0.945	0.0702	-0.0351	0.0351
IFI16	Q16666	0.0157681	0.596	0.78	-0.39	0.39
IFI44	Q8TCB0	0.0300071	0.733	1.6	-0.8	0.8
IFIT1	P09914	0.013172	0.548	1.04	-0.518	0.518
IFIT2	P09913	0.0587042	0.824	2.16	-1.08	1.08
IFNA21	P01568	0.328298	0.929	-0.376	0.188	-0.188
IGF2BP3	O00425	0.261235	0.921	0.324	-0.162	0.162
IGFALS	P35858	0.625955	0.948	0.293	-0.146	0.146
IGFBP2	P18065	0.112113	0.878	-0.668	0.334	-0.334
IKBKE	Q14164	0.259149	0.921	0.21	-0.105	0.105
IL11	P20809	0.027461	0.717	0.398	-0.199	0.199
IL16	Q14005	0.164465	0.901	1.62	-0.809	0.809
IL18	Q14116	0.854367	0.955	0.107	-0.0536	0.0536
IL4R	P24394	0.304639	0.927	-0.186	0.0929	-0.0929
IL7R	P16871	0.00815514	0.403	0.842	-0.421	0.421
ILF2	Q12905	0.646244	0.948	0.11	-0.055	0.055
ILF3	Q12906	0.0473527	0.8	-0.301	0.15	-0.15
ILK	Q13418	0.978027	0.958	-0.00387	0.00193	-0.00193
IMPA1	P29218	0.686804	0.95	-0.123	0.0613	-0.0613
IMPDH1	P20839	0.322477	0.929	-0.604	0.302	-0.302
IMPDH2	P12268	0.00227864	0.0775	-0.929	0.465	-0.465
IPO4	Q8TEX9	0.0201993	0.655	-0.55	0.275	-0.275
IPO5	O00410	0.0128253	0.54	-0.602	0.301	-0.301
IPO7	O95373	0.255399	0.92	-0.349	0.174	-0.174
IPO9	Q96P70	0.255119	0.92	-0.194	0.0971	-0.0971
IQCE	Q6IPM2	0.0056905	0.29	0.547	-0.274	0.274
IQGAP1	P46940	0.350447	0.931	0.117	-0.0584	0.0584
IRF2BP2	Q7Z5L9	0.056889	0.821	0.832	-0.416	0.416
IRF6	O14896	0.108969	0.877	1.25	-0.627	0.627
IST1	P53990	0.324024	0.929	0.248	-0.124	0.124
ITCH	Q96J02	0.826262	0.954	-0.0526	0.0263	-0.0263
ITGA2	P17301	0.0568599	0.821	0.372	-0.186	0.186
ITGA3	P26006	0.340123	0.93	2.05	-1.02	1.02
ITGA6	P23229	0.911545	0.956	0.0529	-0.0265	0.0265
ITGA8	P53708	0.118599	0.882	0.817	-0.409	0.409
ITGAX	P20702	0.17126	0.903	0.255	-0.128	0.128
ITGB1	P05556	0.0110575	0.497	0.483	-0.241	0.241
ITGB4	P16144	0.00523367	0.265	0.597	-0.298	0.298
ITIH2	P19823	0.178835	0.905	1.36	-0.68	0.68
ITIH6	Q6UXX5	0.343003	0.931	-0.118	0.059	-0.059
ITPA	Q9BY32	0.5277	0.943	0.3	-0.15	0.15
IVD	P26440	0.93038	0.957	0.0429	-0.0215	0.0215
JUP	P14923	0.225425	0.915	0.157	-0.0784	0.0784
KARS	Q15046	0.709167	0.951	-0.0936	0.0468	-0.0468
KAZALD1	Q96I82	0.412566	0.936	-1.05	0.526	-0.526
KCNH6	Q9H252	0.277412	0.923	-0.431	0.215	-0.215
KCNIP3	Q9Y2W7	0.739863	0.952	0.223	-0.111	0.111
KCTD12	Q96CX2	0.0045381	0.224	0.764	-0.382	0.382
KCTD21	Q4G0X4	0.00804477	0.399	0.871	-0.435	0.435
KDM1B	Q8NB78	0.611153	0.947	-0.34	0.17	-0.17
KHDRBS1	Q07666	0.241687	0.918	-0.275	0.137	-0.137
KHSRP	Q92945	0.135967	0.89	-0.366	0.183	-0.183
KIF21B	O75037	0.314399	0.928	0.866	-0.433	0.433
KIF5B	P33176	0.948283	0.957	0.0122	-0.0061	0.0061
KLHDC7B	Q96G42	0.561713	0.945	-0.183	0.0917	-0.0917
KLHL12	Q53G59	0.363795	0.933	-0.186	0.0928	-0.0928
KLHL6	Q8WZ60	0.191431	0.908	0.723	-0.362	0.362
KPNA1	P52294	0.0897099	0.863	0.24	-0.12	0.12
KPNA2	P52292	0.00269769	0.105	-0.736	0.368	-0.368
KPNA3	O00505	0.422221	0.937	0.11	-0.055	0.055
KPNA4	O00629	0.230529	0.916	0.632	-0.316	0.316
KPNB1	Q14974	0.361942	0.932	0.216	-0.108	0.108
KRT1	P04264	0.56139	0.945	-0.244	0.122	-0.122
KRT10	P13645	0.541183	0.944	0.0824	-0.0412	0.0412
KRT12	Q99456	0.0121937	0.526	-0.936	0.468	-0.468
KRT17	Q04695	0.109732	0.877	0.462	-0.231	0.231
KRT18	P05783	0.192304	0.908	-0.204	0.102	-0.102
KRT19	P08727	0.0915175	0.864	0.314	-0.157	0.157
KRT2	P35908	0.838891	0.955	-0.0782	0.0391	-0.0391
KRT6A;KRT6C	P02538;P48668	0.0192241	0.644	0.537	-0.268	0.268
KRT7	P08729	0.402695	0.936	0.143	-0.0714	0.0714
KRT75	O95678	0.617658	0.947	0.921	-0.461	0.461
KRT8	P05787	0.498868	0.942	-0.0879	0.0439	-0.0439
KRT9	P35527	0.360869	0.932	-0.661	0.331	-0.331
KSR2	Q6VAB6	0.191103	0.908	-0.212	0.106	-0.106
KTI12	Q96EK9	0.0862335	0.859	-1.01	0.506	-0.506
KTN1	Q86UP2	0.390503	0.935	0.118	-0.0588	0.0588
KYNU	Q16719	0.96747	0.958	-0.00499	0.0025	-0.0025
LACC1	Q8IV20	0.476111	0.941	-0.178	0.0891	-0.0891
LACTB2	Q53H82	0.119037	0.882	-0.579	0.29	-0.29
LAD1	O00515	0.396154	0.935	1.06	-0.528	0.528
LAGE3	Q14657	0.813126	0.954	0.0554	-0.0277	0.0277
LAMB3	Q13751	0.553155	0.945	0.0802	-0.0401	0.0401
LAMC2	Q13753	0.14135	0.893	0.499	-0.249	0.249
LAMP1	P11279	0.903146	0.956	-0.0395	0.0197	-0.0197
LAMP2	P13473	0.61818	0.947	0.2	-0.1	0.1
LANCL2	Q9NS86	0.272593	0.923	1.53	-0.766	0.766
LARP1	Q6PKG0	0.195151	0.909	-0.6	0.3	-0.3
LARP4	Q71RC2	0.335149	0.93	-0.16	0.08	-0.08
LARS	Q9P2J5	0.00366093	0.168	-0.577	0.289	-0.289
LCP1	P13796	0.752586	0.952	0.0528	-0.0264	0.0264
LDHA	P00338	0.989405	0.958	0.00295	-0.00147	0.00147
LGALS1	P09382	0.0126177	0.535	0.621	-0.31	0.31
LGALS3	P17931	0.329408	0.929	0.17	-0.0849	0.0849
LGMN	Q99538	0.731721	0.951	0.16	-0.08	0.08
LILRB2	Q8N423	0.470177	0.94	1.08	-0.54	0.54
LIMA1	Q9UHB6	0.0438254	0.79	-0.605	0.303	-0.303
LINC00479	Q96M42	0.197034	0.909	0.405	-0.203	0.203
LMAN2	Q12907	0.0680273	0.839	0.502	-0.251	0.251
LMNA	P02545	0.536419	0.944	-0.16	0.08	-0.08
LMNB1	P20700	0.298825	0.926	-0.218	0.109	-0.109
LMNB2	Q03252	0.958301	0.958	0.0154	-0.00769	0.00769
LOXL1	Q08397	0.475027	0.94	0.318	-0.159	0.159
LPHN2	O95490	0.244234	0.918	1.12	-0.56	0.56
LRP1B	Q9NZR2	0.142491	0.893	0.302	-0.151	0.151
LRP4	O75096	0.459373	0.94	-0.411	0.205	-0.205
LRPPRC	P42704	0.00120315	0.0217	-0.838	0.419	-0.419
LRRC31	Q6UY01	0.456506	0.939	0.371	-0.186	0.186
LRRC34	Q8IZ02	0.60383	0.947	-0.614	0.307	-0.307
LRRC38	Q5VT99	0.692133	0.95	-0.165	0.0825	-0.0825
LRRC47	Q8N1G4	0.273803	0.923	0.855	-0.427	0.427
LRRC59	Q96AG4	0.0439995	0.79	-0.727	0.364	-0.364
LRRC8E	Q6NSJ5	0.507032	0.942	-0.127	0.0634	-0.0634
LSM1	O15116	0.440311	0.938	-0.126	0.063	-0.063
LSM12	Q3MHD2	0.319638	0.928	0.165	-0.0823	0.0823
LSM2	Q9Y333	0.847902	0.955	0.238	-0.119	0.119
LSM3	P62310	0.0327139	0.747	-0.344	0.172	-0.172
LSM4	Q9Y4Z0	0.0950372	0.867	-1.12	0.558	-0.558
LSM5	Q9Y4Y9	0.626502	0.948	0.202	-0.101	0.101
LSM7	Q9UK45	0.660545	0.949	0.0978	-0.0489	0.0489
LSM8	O95777	0.519957	0.943	0.334	-0.167	0.167
LTA4H	P09960	0.919655	0.957	-0.0185	0.00926	-0.00926
LUC7L2	Q9Y383	0.366437	0.933	-0.219	0.11	-0.11
LUM	P51884	0.0265286	0.711	0.727	-0.364	0.364
LURAP1L	Q8IV03	0.453373	0.939	0.68	-0.34	0.34
LYPD4	Q6UWN0	0.216011	0.913	-0.801	0.4	-0.4
LYPLA1	O75608	0.512291	0.943	-0.607	0.303	-0.303
LYPLA2	O95372	0.279411	0.924	0.255	-0.128	0.128
LYST	Q99698	0.257086	0.92	0.406	-0.203	0.203
LZIC	Q8WZA0	0.0344197	0.755	2.39	-1.2	1.2
MACF1	Q9UPN3	0.986473	0.958	0.0052	-0.0026	0.0026
MAGEA2	P43356	0.933228	0.957	-0.0127	0.00637	-0.00637
MAGEA6	P43360	0.789279	0.953	-0.123	0.0615	-0.0615
MAGEB5	Q9BZ81	0.222484	0.915	0.282	-0.141	0.141
MAGED2	Q9UNF1	0.0779739	0.851	0.382	-0.191	0.191
MAGOH	P61326	0.225349	0.915	-0.276	0.138	-0.138
MANF	P55145	0.461125	0.94	0.934	-0.467	0.467
MAP2K2	P36507	0.48692	0.941	0.113	-0.0567	0.0567
MAP4	P27816	0.592937	0.946	-0.0615	0.0308	-0.0308
MAPK1	P28482	0.0140826	0.566	0.549	-0.274	0.274
MAPK14	Q16539	0.118593	0.882	0.209	-0.104	0.104
MAPRE1	Q15691	0.399666	0.935	0.125	-0.0623	0.0623
MARS	P56192	0.100115	0.871	-0.448	0.224	-0.224
MAST3	O60307	0.322958	0.929	-0.891	0.445	-0.445
MAT2A	P31153	0.164972	0.901	-0.243	0.122	-0.122
MAT2B	Q9NZL9	0.15824	0.899	-0.442	0.221	-0.221
MATR3	P43243	0.000930116	0.0118	-0.801	0.401	-0.401
MBNL1	Q9NR56	0.21237	0.913	1.33	-0.664	0.664
MBOAT7	Q96N66	0.00616807	0.315	3.56	-1.78	1.78
MCF2L2	Q86YR7	0.410641	0.936	-0.126	0.0632	-0.0632
MCM2	P49736	0.0523686	0.812	-0.724	0.362	-0.362
MCM3	P25205	0.00512917	0.259	-0.646	0.323	-0.323
MCM4	P33991	0.0142135	0.568	-0.878	0.439	-0.439
MCM5	P33992	0.00122048	0.0223	-0.867	0.433	-0.433
MCM6	Q14566	0.0023395	0.0813	-0.852	0.426	-0.426
MCMBP	Q9BTE3	0.0881271	0.861	-0.962	0.481	-0.481
MCTS1	Q9ULC4	0.508228	0.942	-0.138	0.069	-0.069
MDH1	P40925	0.671694	0.949	-0.106	0.0531	-0.0531
MDH2	P40926	0.471665	0.94	0.577	-0.289	0.289
ME2	P23368	0.951887	0.957	-0.0105	0.00523	-0.00523
MEIOB	Q8N635	0.23705	0.917	1.08	-0.541	0.541
METAP2	P50579	0.0940258	0.866	-0.261	0.131	-0.131
MEX3C	Q5U5Q3	0.0810033	0.854	1.53	-0.764	0.764
MFAP3	P55082	0.398071	0.935	-0.97	0.485	-0.485
MFSD7	Q6UXD7	0.0336666	0.752	1.66	-0.828	0.828
MGEA5	O60502	0.11003	0.877	0.429	-0.214	0.214
MIA3	Q5JRA6	0.384675	0.934	-0.267	0.133	-0.133
MIF	P14174	0.00451722	0.223	-1.66	0.832	-0.832
MLEC	Q14165	0.296227	0.926	0.3	-0.15	0.15
MMP14	P50281	0.00503354	0.254	0.758	-0.379	0.379
MMS19	Q96T76	0.156969	0.898	0.223	-0.111	0.111
MOB1A;MOB1B	Q9H8S9;Q7L9L4	0.597172	0.947	-0.118	0.0591	-0.0591
MOB4	Q9Y3A3	0.0212301	0.666	0.546	-0.273	0.273
MOGS	Q13724	0.803784	0.954	0.0392	-0.0196	0.0196
MON1A	Q86VX9	0.0984394	0.869	1.22	-0.611	0.611
MRPL1	Q9BYD6	0.569479	0.945	-0.12	0.0602	-0.0602
MRPL10	Q7Z7H8	0.338872	0.93	-0.583	0.291	-0.291
MRPL12	P52815	0.214863	0.913	-0.313	0.157	-0.157
MRPL21	Q7Z2W9	0.0794554	0.853	1.41	-0.706	0.706
MRPS30	Q9NP92	0.0511694	0.809	0.282	-0.141	0.141
MRPS6	P82932	0.0973305	0.869	0.569	-0.285	0.285
MRRF	Q96E11	0.3749	0.933	-0.275	0.138	-0.138
MRTO4	Q9UKD2	0.02579	0.706	-0.946	0.473	-0.473
MSH2	P43246	0.0222857	0.676	-0.565	0.282	-0.282
MSN	P26038	0.0719177	0.844	0.283	-0.141	0.141
MT2A	P02795	0.178985	0.905	0.498	-0.249	0.249
MTAP	Q13126	0.731062	0.951	0.281	-0.14	0.14
MTCH2	Q9Y6C9	0.147564	0.895	-0.496	0.248	-0.248
MTDH	Q86UE4	0.246233	0.919	0.421	-0.21	0.21
MTHFD1	P11586	0.00887673	0.43	-0.615	0.307	-0.307
MTHFD2	P13995	0.0927962	0.865	-0.464	0.232	-0.232
MTPN	P58546	0.261988	0.921	-0.827	0.414	-0.414
MUC13	Q9H3R2	0.0556076	0.818	1.39	-0.696	0.696
MUC3B	Q9H195	0.0210906	0.665	2.94	-1.47	1.47
MUC4	Q99102	0.0721331	0.844	1.54	-0.769	0.769
MVD	P53602	0.322322	0.929	0.294	-0.147	0.147
MVP	Q14764	0.00598164	0.306	0.686	-0.343	0.343
MYCBP	Q99417	0.813041	0.954	0.263	-0.132	0.132
MYDGF	Q969H8	0.205765	0.911	0.221	-0.111	0.111
MYH9	P35579	0.305112	0.927	0.148	-0.0739	0.0739
MYL12B	O14950	0.195471	0.909	-0.273	0.136	-0.136
MYL6	P60660	0.993538	0.958	-0.00243	0.00121	-0.00121
MYO16	Q9Y6X6	0.407118	0.936	-1.86	0.929	-0.929
MYO1B	O43795	0.194564	0.909	0.181	-0.0907	0.0907
MYO1D	O94832	0.230504	0.916	-1.73	0.863	-0.863
MYOF	Q9NZM1	0.0213706	0.667	0.524	-0.262	0.262
MYOM2	P54296	0.237085	0.917	0.358	-0.179	0.179
NAA10	P41227	0.0326669	0.747	-1.03	0.514	-0.514
NAA15	Q9BXJ9	0.0455492	0.795	-0.419	0.209	-0.209
NAA60	Q9H7X0	0.147282	0.895	-0.901	0.45	-0.45
NACA	E9PAV3;Q13765	0.0147351	0.578	-0.657	0.328	-0.328
NAE1	Q13564	0.00612298	0.313	-0.729	0.364	-0.364
NAF1	Q96HR8	0.418916	0.937	1.17	-0.586	0.586
NAGK	Q9UJ70	0.00319435	0.138	0.82	-0.41	0.41
NAMPT	P43490	0.309744	0.927	0.167	-0.0833	0.0833
NANS	Q9NR45	0.488091	0.941	0.38	-0.19	0.19
NAP1L1	P55209	0.0230302	0.683	-0.414	0.207	-0.207
NAP1L4	Q99733	0.600198	0.947	-0.07	0.035	-0.035
NAPA	P54920	0.0113718	0.505	1.2	-0.601	0.601
NAPRT	Q6XQN6	0.00604139	0.309	0.546	-0.273	0.273
NARS	O43776	0.736863	0.952	0.139	-0.0693	0.0693
NASP	P49321	0.0121347	0.524	-0.65	0.325	-0.325
NAT10	Q9H0A0	0.000615354	0.00395	-0.895	0.448	-0.448
NBR1	Q14596	0.398583	0.935	-0.992	0.496	-0.496
NCAPD2	Q15021	0.901721	0.956	-0.0174	0.0087	-0.0087
NCAPH	Q15003	0.48233	0.941	0.156	-0.0782	0.0782
NCBP1	Q09161	0.0377181	0.769	-0.349	0.175	-0.175
NCEH1	Q6PIU2	0.0539887	0.815	-0.582	0.291	-0.291
NCL	P19338	0.270075	0.922	-0.186	0.0932	-0.0932
NCSTN	Q92542	0.00997117	0.466	0.668	-0.334	0.334
NDRG1	Q92597	0.518312	0.943	0.0985	-0.0493	0.0493
NDUFS1	P28331	0.0796906	0.853	-3.8	1.9	-1.9
NECAB2	Q7Z6G3	0.546362	0.944	-1.1	0.551	-0.551
NEDD4	P46934	0.644526	0.948	-0.316	0.158	-0.158
NEDD8	Q15843	0.329381	0.929	0.77	-0.385	0.385
NELFB	Q8WX92	0.149095	0.896	-0.488	0.244	-0.244
NELFCD	Q8IXH7	0.636204	0.948	-0.294	0.147	-0.147
NFKB1	P19838	0.134293	0.89	-0.31	0.155	-0.155
NFKB2	Q00653	0.554807	0.945	0.205	-0.102	0.102
NGDN	Q8NEJ9	0.795605	0.953	0.176	-0.0879	0.0879
NHP2L1	P55769	0.0900502	0.863	-0.515	0.257	-0.257
NIT2	Q9NQR4	0.170117	0.902	-0.24	0.12	-0.12
NLE1	Q9NVX2	0.366898	0.933	-0.224	0.112	-0.112
NLRP12	P59046	0.190441	0.908	-0.264	0.132	-0.132
NMD3	Q96D46	0.374358	0.933	-0.167	0.0836	-0.0836
NME1	P15531	0.423983	0.937	-0.488	0.244	-0.244
NME2	P22392	0.5273	0.943	-0.221	0.111	-0.111
NMNAT1	Q9HAN9	0.06125	0.829	0.368	-0.184	0.184
NMT1	P30419	0.973129	0.958	0.00529	-0.00265	0.00265
NOMO1	Q15155	0.89801	0.956	-0.0224	0.0112	-0.0112
NONO	Q15233	0.0556557	0.818	-0.347	0.173	-0.173
NPAS3	Q8IXF0	0.39341	0.935	-0.197	0.0985	-0.0985
NPC1L1	Q9UHC9	0.218677	0.914	-1.04	0.522	-0.522
NPC2	P61916	0.591188	0.946	-0.144	0.0718	-0.0718
NPEPPS	P55786	0.416957	0.937	0.113	-0.0566	0.0566
NPM1	P06748	0.00657996	0.335	-0.685	0.343	-0.343
NPM3	O75607	0.0427289	0.787	-0.622	0.311	-0.311
NR2C2AP	Q86WQ0	0.336624	0.93	0.66	-0.33	0.33
NRD1	O43847	0.216382	0.913	-0.302	0.151	-0.151
NSDHL	Q15738	0.762608	0.952	-0.0458	0.0229	-0.0229
NSUN2	Q08J23	0.0113342	0.504	-0.508	0.254	-0.254
NT5E	P21589	0.0470299	0.799	0.417	-0.209	0.209
NUBP2	Q9Y5Y2	0.776528	0.953	-0.126	0.0632	-0.0632
NUDC	Q9Y266	0.797948	0.953	0.091	-0.0455	0.0455
NUDCD1	Q96RS6	0.0502006	0.807	1.38	-0.689	0.689
NUDT21	O43809	0.0999053	0.871	-0.527	0.264	-0.264
NUDT4	A0A024RBG1;Q9NZJ9	0.880208	0.956	-0.0216	0.0108	-0.0108
NUP133	Q8WUM0	0.223934	0.915	-0.23	0.115	-0.115
NUP155	O75694	0.0383676	0.772	-0.569	0.284	-0.284
NUP188	Q5SRE5	0.2066	0.911	0.188	-0.094	0.094
NUP205	Q92621	0.37408	0.933	0.207	-0.103	0.103
NUP37	Q8NFH4	0.0340613	0.754	-0.552	0.276	-0.276
NUP62	P37198	0.292053	0.925	-0.955	0.477	-0.477
NUP88	Q99567	0.106595	0.875	1.16	-0.58	0.58
NUP93	Q8N1F7	0.0136604	0.558	-0.543	0.272	-0.272
NUTF2	P61970	0.609721	0.947	-0.154	0.077	-0.077
NUTM2G	Q5VZR2	0.458572	0.939	0.625	-0.313	0.313
NXN	Q6DKJ4	0.00164577	0.0405	0.961	-0.481	0.481
OAS3	Q9Y6K5	0.0105697	0.484	2.8	-1.4	1.4
OAT	P04181	0.0987189	0.87	-0.299	0.15	-0.15
OGDH	Q02218	0.629766	0.948	0.0623	-0.0311	0.0311
OGFR	Q9NZT2	0.477738	0.941	0.516	-0.258	0.258
OGT	O15294	0.0139047	0.562	-0.841	0.42	-0.42
OLA1	Q9NTK5	0.196825	0.909	-0.18	0.0902	-0.0902
OLAH	Q9NV23	0.532233	0.944	0.762	-0.381	0.381
OPN3	Q9H1Y3	0.0215807	0.67	1.37	-0.684	0.684
OPTC	Q9UBM4	0.105406	0.874	0.473	-0.236	0.236
OR2A4	O95047	0.279669	0.924	-2.42	1.21	-1.21
OR52A4P	A6NMU1	0.0993165	0.87	0.524	-0.262	0.262
OSBP	P22059	0.293152	0.925	0.244	-0.122	0.122
OSGEP	Q9NPF4	0.894972	0.956	-0.0346	0.0173	-0.0173
OSTF1	Q92882	0.909354	0.956	-0.0529	0.0265	-0.0265
OTOF	Q9HC10	0.547551	0.944	0.0847	-0.0423	0.0423
OTUB1	Q96FW1	0.270811	0.922	1.66	-0.83	0.83
OTUD6B	Q8N6M0	0.431699	0.938	-0.118	0.059	-0.059
OVCH2	Q7RTZ1	0.931847	0.957	-0.0549	0.0275	-0.0275
OXCT1	P55809	0.0418072	0.784	-1.64	0.82	-0.82
OXSR1	O95747	0.373738	0.933	-0.723	0.362	-0.362
P0DP25;P0DP24;P0DP23	P0DP25;P0DP24;P0DP23	0.256498	0.92	0.238	-0.119	0.119
P0DTA3	P0DTA3	0.5468	0.944	0.0887	-0.0443	0.0443
P4HB	P07237	0.164973	0.901	0.413	-0.207	0.207
PA2G4	Q9UQ80	0.0177882	0.626	-0.425	0.212	-0.212
PABPC1	P11940	0.108863	0.876	-0.297	0.148	-0.148
PABPC4	Q13310	0.0818115	0.855	-0.738	0.369	-0.369
PABPN1	Q86U42	0.437503	0.938	-0.638	0.319	-0.319
PAFAH1B1	P43034	0.518489	0.943	0.565	-0.283	0.283
PAFAH1B2	P68402	0.333984	0.93	1.07	-0.536	0.536
PAFAH1B3	Q15102	0.889743	0.956	-0.029	0.0145	-0.0145
PAICS	P22234	0.00793425	0.394	-0.484	0.242	-0.242
PAIP1	Q9H074	0.821915	0.954	0.1	-0.0501	0.0501
PAK2	Q13177	0.459946	0.94	0.0978	-0.0489	0.0489
PALM	O75781	0.180825	0.905	-0.432	0.216	-0.216
PAN3	Q58A45	0.387788	0.935	0.353	-0.177	0.177
PAPOLG	Q9BWT3	0.495725	0.942	-0.801	0.4	-0.4
PARK7	Q99497	0.08477	0.858	-0.26	0.13	-0.13
PARP1	P09874	0.0486394	0.803	-0.388	0.194	-0.194
PARP9	Q8IXQ6	0.536152	0.944	-0.66	0.33	-0.33
PARVA	Q9NVD7	0.244292	0.918	0.236	-0.118	0.118
PBDC1	Q9BVG4	0.376963	0.934	0.226	-0.113	0.113
PBK	Q96KB5	0.00908682	0.437	-0.563	0.282	-0.282
PC	P11498	0.0252503	0.702	0.536	-0.268	0.268
PCBP1	Q15365	0.0300624	0.733	-0.351	0.175	-0.175
PCBP2	Q15366	0.0839308	0.857	-0.49	0.245	-0.245
PCDH11Y	Q9BZA8	0.538361	0.944	0.283	-0.142	0.142
PCDHGA9	Q9Y5G4	0.586534	0.946	0.13	-0.065	0.065
PCDHGB1	Q9Y5G3	0.303441	0.927	-1.75	0.874	-0.874
PCMT1	P22061	0.274999	0.923	-0.169	0.0847	-0.0847
PCNA	P12004	0.938932	0.957	-0.015	0.0075	-0.0075
PCNP	Q8WW12	0.044612	0.792	-0.844	0.422	-0.422
PCSK7	Q16549	0.202884	0.911	-0.672	0.336	-0.336
PCYOX1	Q9UHG3	0.148088	0.895	-0.367	0.183	-0.183
PCYT1A	P49585	0.614743	0.947	0.105	-0.0527	0.0527
PDAP1	Q13442	0.0819052	0.855	-2.37	1.18	-1.18
PDCD10	Q9BUL8	0.192447	0.908	-0.218	0.109	-0.109
PDCD5	O14737	0.453094	0.939	0.983	-0.491	0.491
PDCD6	O75340	0.397185	0.935	0.561	-0.281	0.281
PDCD6IP	Q8WUM4	0.00149081	0.0334	0.65	-0.325	0.325
PDCL3	Q9H2J4	0.56942	0.945	-0.587	0.293	-0.293
PDE11A	Q9HCR9	0.0921961	0.865	0.449	-0.225	0.225
PDE4D	Q08499	0.251282	0.92	2.07	-1.04	1.04
PDHA1	P08559	0.229712	0.916	-0.259	0.13	-0.13
PDHB	P11177	0.753937	0.952	-0.0519	0.026	-0.026
PDIA3	P30101	0.339512	0.93	0.282	-0.141	0.141
PDIA4	P13667	0.161278	0.9	0.229	-0.114	0.114
PDIA6	Q15084	0.8835	0.956	0.0274	-0.0137	0.0137
PDLIM1	O00151	0.127979	0.887	0.234	-0.117	0.117
PDLIM5	Q96HC4	0.409888	0.936	-0.52	0.26	-0.26
PDRG1	Q9NUG6	0.412824	0.936	0.229	-0.115	0.115
PDXK	O00764	0.0745487	0.847	0.27	-0.135	0.135
PEA15	Q15121	0.0421664	0.785	1.02	-0.512	0.512
PEBP1	P30086	0.0697088	0.841	-0.434	0.217	-0.217
PEF1	Q9UBV8	0.305719	0.927	-0.194	0.0968	-0.0968
PEPD	P12955	0.202212	0.91	0.238	-0.119	0.119
PER3	P56645	0.23182	0.916	0.25	-0.125	0.125
PES1	O00541	0.494336	0.942	-1.09	0.547	-0.547
PEX11A	O75192	0.4875	0.941	0.407	-0.204	0.204
PFAS	O15067	0.00263667	0.101	-0.697	0.348	-0.348
PFDN1	O60925	0.158844	0.899	1.01	-0.505	0.505
PFDN4	Q9NQP4	0.613144	0.947	0.713	-0.357	0.357
PFDN5	Q99471	0.726702	0.951	0.0803	-0.0402	0.0402
PFDN6	O15212	0.44757	0.939	0.832	-0.416	0.416
PFKL	P17858	0.016355	0.605	1.35	-0.676	0.676
PFKM	P08237	0.93719	0.957	-0.0196	0.00979	-0.00979
PFKP	Q01813	0.472579	0.94	0.104	-0.0519	0.0519
PFN1	P07737	0.93587	0.957	0.0127	-0.00633	0.00633
PFN2	P35080	0.665388	0.949	0.427	-0.214	0.214
PFN3	P60673	0.0942839	0.866	-2.17	1.09	-1.09
PGAM1	P18669	0.712585	0.951	-0.619	0.31	-0.31
PGAM5	Q96HS1	0.670609	0.949	0.425	-0.212	0.212
PGD	P52209	0.0637625	0.833	0.335	-0.167	0.167
PGK1	P00558	0.921443	0.957	0.0127	-0.00634	0.00634
PGLS	O95336	0.0159962	0.599	0.562	-0.281	0.281
PGM1	P36871	0.289557	0.925	0.18	-0.0899	0.0899
PGM2	Q96G03	0.101457	0.872	-0.38	0.19	-0.19
PGM3	O95394	0.348843	0.931	0.193	-0.0965	0.0965
PGP	A6NDG6	0.0132912	0.55	-0.636	0.318	-0.318
PGRMC1	O00264	0.855844	0.955	0.0881	-0.0441	0.0441
PHB	P35232	0.110439	0.877	-0.75	0.375	-0.375
PHB2	Q99623	0.0181235	0.63	-0.47	0.235	-0.235
PHGDH	O43175	0.95805	0.958	0.00668	-0.00334	0.00334
PHPT1	Q9NRX4	0.216995	0.914	1.45	-0.726	0.726
PIGO	Q8TEQ8	0.155031	0.898	0.24	-0.12	0.12
PIH1D2	Q8WWB5	0.275315	0.923	0.134	-0.0669	0.0669
PITPNA	Q00169	0.087793	0.861	0.278	-0.139	0.139
PITPNB	P48739	0.295536	0.926	0.138	-0.0689	0.0689
PKM	P14618	0.59279	0.946	0.0717	-0.0358	0.0358
PLCB3	Q01970	0.795877	0.953	-0.0331	0.0165	-0.0165
PLCH1	Q4KWH8	0.0577028	0.822	-0.704	0.352	-0.352
PLD3	Q8IV08	0.00279603	0.111	0.838	-0.419	0.419
PLEC	Q15149	0.375505	0.934	-0.118	0.0589	-0.0589
PLEK2	Q9NYT0	0.630609	0.948	0.0918	-0.0459	0.0459
PLIN1	O60240	0.0961794	0.868	-2.79	1.4	-1.4
PLIN3	O60664	0.0107388	0.488	0.562	-0.281	0.281
PLK2	Q9NYY3	0.785576	0.953	0.16	-0.0799	0.0799
PLS1	Q14651	0.13809	0.891	-0.371	0.185	-0.185
PLS3	P13797	0.257378	0.92	0.194	-0.0968	0.0968
PLXDC1	Q8IUK5	0.399705	0.935	-0.333	0.166	-0.166
PML	P29590	0.0341028	0.754	0.591	-0.295	0.295
PMM2	O15305	0.302344	0.926	0.134	-0.0669	0.0669
PMPCA	Q10713	0.078974	0.852	-0.37	0.185	-0.185
PMPCB	O75439	0.0102223	0.473	-0.899	0.45	-0.45
PNP	P00491	0.0211488	0.665	-0.503	0.252	-0.252
PNPT1	Q8TCS8	0.00146756	0.0325	0.727	-0.364	0.364
POFUT1	Q9H488	0.966091	0.958	0.00488	-0.00244	0.00244
POLD2	P49005	0.035994	0.762	-1.22	0.608	-0.608
POLDIP2	Q9Y2S7	0.0163966	0.606	-0.991	0.495	-0.495
POLR1C	O15160	0.0297442	0.731	-0.577	0.289	-0.289
POLR2H	P52434	0.32992	0.929	0.747	-0.373	0.373
POM121L2	Q96KW2	0.292852	0.925	-1.38	0.688	-0.688
POTEE	Q6S8J3	0.326741	0.929	0.209	-0.104	0.104
PPA1	Q15181	0.23039	0.916	-0.201	0.101	-0.101
PPIA	P62937;P0DN37	0.427416	0.937	0.446	-0.223	0.223
PPIB	P23284	0.293732	0.925	0.619	-0.309	0.309
PPID	Q08752	0.0812427	0.855	-0.252	0.126	-0.126
PPIF	P30405	0.633356	0.948	0.569	-0.285	0.285
PPIL1	Q9Y3C6	0.0936051	0.866	-0.439	0.22	-0.22
PPM1G	O15355	0.0290567	0.727	-0.373	0.187	-0.187
PPM1N	Q8N819	0.28598	0.924	-0.84	0.42	-0.42
PPME1	Q9Y570	0.0487762	0.803	0.315	-0.158	0.158
PPP1CA	P62136	0.55644	0.945	0.126	-0.063	0.063
PPP1CB	P62140	0.71644	0.951	0.0489	-0.0245	0.0245
PPP1CC	P36873	0.529185	0.943	0.13	-0.0652	0.0652
PPP1R12A	O14974	0.292314	0.925	-0.375	0.187	-0.187
PPP1R14B	Q96C90	0.272199	0.923	0.949	-0.475	0.475
PPP1R16B	Q96T49	0.249688	0.919	0.353	-0.177	0.177
PPP1R32	Q7Z5V6	0.654276	0.949	0.178	-0.0888	0.0888
PPP1R42	Q7Z4L9	0.14703	0.895	-1.47	0.735	-0.735
PPP1R7	Q15435	0.117163	0.881	2.84	-1.42	1.42
PPP2CA;PPP2CB	P67775;P62714	0.762957	0.952	0.0413	-0.0207	0.0207
PPP2R1A	P30153	0.671257	0.949	0.0748	-0.0374	0.0374
PPP2R2A	P63151	0.0869578	0.86	-0.283	0.142	-0.142
PPP2R4	Q15257	0.21667	0.913	0.745	-0.373	0.373
PPP3CA	Q08209	0.374886	0.933	0.162	-0.0811	0.0811
PPP3R1	P63098	0.0788164	0.852	-0.256	0.128	-0.128
PPP4C	P60510	0.898229	0.956	-0.0605	0.0303	-0.0303
PPP6C	O00743	0.361429	0.932	0.996	-0.498	0.498
PPT1	P50897	0.837078	0.955	0.253	-0.126	0.126
PRAMEF4	O60810	0.814135	0.954	-0.0548	0.0274	-0.0274
PRDX1	Q06830	0.00339768	0.151	-0.584	0.292	-0.292
PRDX2	P32119	0.910429	0.956	-0.0147	0.00734	-0.00734
PRDX3	P30048	0.576052	0.946	0.481	-0.241	0.241
PRDX5	P30044	0.682072	0.95	0.0718	-0.0359	0.0359
PRDX6	P30041	0.586335	0.946	0.156	-0.0781	0.0781
PREP	P48147	0.0697282	0.841	0.259	-0.13	0.13
PRICKLE2	Q7Z3G6	0.0229799	0.683	1.83	-0.913	0.913
PRKACG	P22612	0.364794	0.933	0.539	-0.27	0.27
PRKAG1	P54619	0.384053	0.934	0.511	-0.255	0.255
PRKAR1A	P10644	0.0942571	0.866	0.435	-0.218	0.218
PRKAR2A	P13861	0.0147384	0.578	-0.376	0.188	-0.188
PRKCSH	P14314	0.495579	0.942	0.217	-0.109	0.109
PRKDC	P78527	0.0256238	0.704	-0.383	0.191	-0.191
PRL	P01236	0.465944	0.94	1.02	-0.511	0.511
PRMT1	Q99873	0.141384	0.893	-0.226	0.113	-0.113
PRMT3	O60678	0.251098	0.92	2.71	-1.35	1.35
PRMT5	O14744	0.0240288	0.692	-0.495	0.247	-0.247
PROCR	Q9UNN8	0.119532	0.883	-0.798	0.399	-0.399
PRPF19	Q9UMS4	0.00813933	0.402	-0.445	0.223	-0.223
PRPF3	O43395	0.0190172	0.641	-0.358	0.179	-0.179
PRPF4	O43172	0.642503	0.948	0.123	-0.0615	0.0615
PRPF8	Q6P2Q9	0.115017	0.88	-0.281	0.14	-0.14
PRPS1	P60891	0.464459	0.94	-0.295	0.148	-0.148
PRPS2	P11908	0.133982	0.889	1.03	-0.515	0.515
PRPSAP1	Q14558	0.15583	0.898	-0.259	0.129	-0.129
PRPSAP2	O60256	0.967693	0.958	-0.0311	0.0155	-0.0155
PSAP	P07602	0.377633	0.934	0.166	-0.0831	0.0831
PSAT1	Q9Y617	0.946691	0.957	0.0372	-0.0186	0.0186
PSMA1	P25786	0.965907	0.958	-0.0249	0.0124	-0.0124
PSMA2	P25787	0.140956	0.892	0.378	-0.189	0.189
PSMA3	P25788	0.132631	0.889	0.51	-0.255	0.255
PSMA4	P25789	0.110971	0.878	0.384	-0.192	0.192
PSMA5	P28066	0.663709	0.949	-0.151	0.0754	-0.0754
PSMA6	P60900	0.150666	0.896	0.456	-0.228	0.228
PSMA7	O14818	0.375122	0.934	0.267	-0.134	0.134
PSMB1	P20618	0.126386	0.886	0.687	-0.344	0.344
PSMB2	P49721	0.0916198	0.864	0.816	-0.408	0.408
PSMB3	P49720	0.132592	0.889	0.252	-0.126	0.126
PSMB4	P28070	0.0100504	0.468	0.611	-0.306	0.306
PSMB5	P28074	0.00405073	0.194	-1.19	0.593	-0.593
PSMB6	P28072	0.802048	0.954	0.13	-0.0651	0.0651
PSMB7	Q99436	0.402547	0.936	0.189	-0.0944	0.0944
PSMB9	P28065	0.45076	0.939	0.231	-0.116	0.116
PSMC1	P62191	0.441175	0.938	0.0986	-0.0493	0.0493
PSMC2	P35998	0.50525	0.942	0.131	-0.0657	0.0657
PSMC3	P17980	0.319823	0.928	-0.133	0.0667	-0.0667
PSMC4	P43686	0.332836	0.93	-0.14	0.0701	-0.0701
PSMC5	P62195	0.50809	0.942	-0.137	0.0686	-0.0686
PSMC6	P62333	0.842015	0.955	0.0334	-0.0167	0.0167
PSMD1	Q99460	0.182601	0.906	-0.19	0.0952	-0.0952
PSMD10	O75832	0.762226	0.952	0.0467	-0.0233	0.0233
PSMD11	O00231	0.113634	0.879	-0.318	0.159	-0.159
PSMD12	O00232	0.00808289	0.4	-0.598	0.299	-0.299
PSMD13	Q9UNM6	0.642848	0.948	-0.0855	0.0428	-0.0428
PSMD14	O00487	0.377857	0.934	0.109	-0.0543	0.0543
PSMD2	Q13200	0.146642	0.895	-0.229	0.115	-0.115
PSMD3	O43242	0.277913	0.923	-0.168	0.084	-0.084
PSMD4	P55036	0.746265	0.952	-0.0698	0.0349	-0.0349
PSMD5	Q16401	0.0509536	0.809	-0.285	0.143	-0.143
PSMD6	Q15008	0.125876	0.886	-0.332	0.166	-0.166
PSMD7	P51665	0.216797	0.914	-0.225	0.113	-0.113
PSMD8	P48556	0.225209	0.915	-0.211	0.105	-0.105
PSMD9	O00233	0.148534	0.895	-0.349	0.175	-0.175
PSME1	Q06323	0.02395	0.691	0.737	-0.369	0.369
PSME2	Q9UL46	0.341308	0.93	0.412	-0.206	0.206
PSME3	P61289	0.537214	0.944	0.362	-0.181	0.181
PSMF1	Q92530	0.392854	0.935	0.519	-0.26	0.26
PSMG2	Q969U7	0.410884	0.936	0.807	-0.404	0.404
PSPC1	Q8WXF1	0.129282	0.887	-0.187	0.0937	-0.0937
PTBP1	P26599	0.0226074	0.679	-0.448	0.224	-0.224
PTBP3	O95758	0.0342324	0.755	-0.421	0.21	-0.21
PTGES2	Q9H7Z7	0.825731	0.954	-0.0755	0.0377	-0.0377
PTGES3	Q15185	0.0964474	0.868	-0.792	0.396	-0.396
PTGR1	Q14914	0.182448	0.906	-0.453	0.226	-0.226
PTGS1	P23219	0.581046	0.946	-0.55	0.275	-0.275
PTMA	P06454	0.218198	0.914	2.5	-1.25	1.25
PTPN1	P18031	0.270575	0.922	0.378	-0.189	0.189
PTPN21	Q16825	0.292699	0.925	-0.343	0.171	-0.171
PTRF	Q6NZI2	0.34253	0.931	0.211	-0.106	0.106
PTRH2	Q9Y3E5	0.316331	0.928	0.813	-0.406	0.406
PUF60	Q9UHX1	0.0239354	0.691	-0.522	0.261	-0.261
PUSL1	Q8N0Z8	0.462391	0.94	-0.151	0.0757	-0.0757
PXN	P49023	0.409822	0.936	0.207	-0.103	0.103
PYCR1	P32322	0.289044	0.925	-1.11	0.553	-0.553
PYGL	P06737	0.159525	0.899	-1.29	0.646	-0.646
PYROXD2	Q8N2H3	0.0886804	0.862	-0.32	0.16	-0.16
PZP	P20742	0.714945	0.951	-0.204	0.102	-0.102
Q6ZT62	Q6ZT62	0.694524	0.95	0.156	-0.0781	0.0781
Q9H8V8	Q9H8V8	0.0182042	0.631	1.72	-0.862	0.862
QARS	P47897	0.065689	0.836	-0.384	0.192	-0.192
QTRT1	Q9BXR0	0.412721	0.936	-0.268	0.134	-0.134
RAB10	P61026	0.252727	0.92	0.38	-0.19	0.19
RAB11B	Q15907	0.567486	0.945	-0.142	0.0708	-0.0708
RAB14	P61106	0.238161	0.917	0.604	-0.302	0.302
RAB18	Q9NP72	0.00936063	0.446	0.594	-0.297	0.297
RAB1A	P62820	0.340011	0.93	0.173	-0.0863	0.0863
RAB1B	Q9H0U4	0.0659042	0.836	0.444	-0.222	0.222
RAB21	Q9UL25	0.0861195	0.859	0.378	-0.189	0.189
RAB23	Q9ULC3	0.0424559	0.786	-1.74	0.869	-0.869
RAB2A	P61019	0.164444	0.901	0.267	-0.133	0.133
RAB32	Q13637	0.134375	0.89	0.563	-0.281	0.281
RAB3GAP2	Q9H2M9	0.199801	0.91	0.2	-0.1	0.1
RAB5A	P20339	0.226651	0.915	0.524	-0.262	0.262
RAB5C	P51148	0.910875	0.956	-0.0175	0.00875	-0.00875
RAB7A	P51149	0.635913	0.948	-0.144	0.072	-0.072
RABEP2	Q9H5N1	0.584437	0.946	0.116	-0.0582	0.0582
RABGGTB	P53611	0.728092	0.951	0.15	-0.0749	0.0749
RAC1	P63000	0.0747149	0.847	0.69	-0.345	0.345
RAC2	P15153	0.0097894	0.46	0.469	-0.234	0.234
RAD21	O60216	0.191658	0.908	1.04	-0.518	0.518
RAD23A	P54725	0.313487	0.928	-0.553	0.276	-0.276
RAD23B	P54727	0.152853	0.897	-0.247	0.123	-0.123
RAE1	P78406	0.572647	0.945	-0.114	0.0568	-0.0568
RALB	P11234	0.192219	0.908	-1.03	0.517	-0.517
RALY	Q9UKM9	0.811417	0.954	-0.111	0.0554	-0.0554
RAN	P62826	0.126624	0.886	-0.391	0.195	-0.195
RANBP1	P43487	0.122794	0.884	-0.765	0.382	-0.382
RANBP6	O60518	0.213641	0.913	1.81	-0.904	0.904
RANGAP1	P46060	0.398247	0.935	-0.111	0.0556	-0.0556
RAP1A	P62834	0.998196	0.958	-0.00182	0.000909	-0.000909
RAP1B	P61224;A6NIZ1	0.651863	0.949	0.106	-0.0529	0.0529
RAP2B	P61225	0.230374	0.916	0.7	-0.35	0.35
RARS	P54136	0.550142	0.944	-0.0814	0.0407	-0.0407
RAVER1	Q8IY67	0.32726	0.929	-1.41	0.703	-0.703
RBBP7	Q16576	0.154198	0.897	-0.488	0.244	-0.244
RBM12	Q9NTZ6	0.460329	0.94	-0.247	0.124	-0.124
RBM3	P98179	0.256116	0.92	-0.657	0.328	-0.328
RBM39	Q14498	0.00154206	0.0356	-0.707	0.353	-0.353
RBM42	Q9BTD8	0.933848	0.957	0.0103	-0.00516	0.00516
RBM8A	Q9Y5S9	0.0094061	0.448	-1.92	0.96	-0.96
RBMY1C	P0DJD4	0.332426	0.93	0.344	-0.172	0.172
RCC1	P18754	0.108267	0.876	-0.246	0.123	-0.123
RCC2	Q9P258	0.977554	0.958	-0.0181	0.00906	-0.00906
RCN1	Q15293	0.109816	0.877	0.436	-0.218	0.218
RDX	P35241	0.439352	0.938	-0.182	0.0911	-0.0911
RECQL	P46063	0.649611	0.949	-0.0729	0.0365	-0.0365
RELA	Q04206	0.680896	0.95	0.179	-0.0895	0.0895
RER1	O15258	0.547231	0.944	-0.583	0.292	-0.292
REV__A0A1B0GU33	REV__A0A1B0GU33	0.138148	0.891	-1.1	0.552	-0.552
REV__A2RUH7	REV__A2RUH7	0.166272	0.901	1.54	-0.769	0.769
REV__A2RUQ5	REV__A2RUQ5	0.210645	0.912	-1.1	0.551	-0.551
REV__A6BM72	REV__A6BM72	0.322287	0.929	-0.359	0.179	-0.179
REV__A6NC57	REV__A6NC57	0.0273043	0.716	-1.09	0.543	-0.543
REV__A6NES4	REV__A6NES4	0.46434	0.94	-0.161	0.0806	-0.0806
REV__A6NMB1	REV__A6NMB1	0.14016	0.892	-1.3	0.648	-0.648
REV__A6NNE9	REV__A6NNE9	0.60688	0.947	-0.0615	0.0308	-0.0308
REV__A8K979	REV__A8K979	0.138726	0.891	0.935	-0.468	0.468
REV__A8MXV4	REV__A8MXV4	0.051118	0.809	0.3	-0.15	0.15
REV__B1ANY3	REV__B1ANY3	0.0987889	0.87	-0.261	0.13	-0.13
REV__B7Z1M9	REV__B7Z1M9	0.573648	0.945	-0.814	0.407	-0.407
REV__C9JE40	REV__C9JE40	0.00926682	0.443	1.8	-0.899	0.899
REV__E7ERA6	REV__E7ERA6	0.00225794	0.0762	1.71	-0.853	0.853
REV__L0R6Q1	REV__L0R6Q1	0.0850356	0.858	-0.299	0.149	-0.149
REV__O00151	REV__O00151	0.44817	0.939	0.638	-0.319	0.319
REV__O00311	REV__O00311	0.464375	0.94	-0.119	0.0597	-0.0597
REV__O00423	REV__O00423	0.3522	0.932	0.269	-0.135	0.135
REV__O14717	REV__O14717	0.508326	0.942	0.253	-0.127	0.127
REV__O15060	REV__O15060	0.457818	0.939	-0.702	0.351	-0.351
REV__O15118	REV__O15118	0.0114521	0.507	-0.485	0.243	-0.243
REV__O15213	REV__O15213	0.082666	0.856	2.68	-1.34	1.34
REV__O15350	REV__O15350	0.633684	0.948	-0.104	0.0521	-0.0521
REV__O43237	REV__O43237	0.00735703	0.37	0.599	-0.299	0.299
REV__O43364;REV__O95231	REV__O43364;REV__O95231	0.029809	0.732	0.431	-0.215	0.215
REV__O43490	REV__O43490	0.738384	0.952	0.366	-0.183	0.183
REV__O43543	REV__O43543	0.204918	0.911	2.92	-1.46	1.46
REV__O43592	REV__O43592	0.240387	0.918	-0.321	0.16	-0.16
REV__O43598	REV__O43598	0.0793122	0.853	2.45	-1.22	1.22
REV__O43681	REV__O43681	0.130743	0.888	1.16	-0.579	0.579
REV__O43897	REV__O43897	0.78415	0.953	0.0667	-0.0334	0.0334
REV__O60575	REV__O60575	0.244109	0.918	-2.17	1.09	-1.09
REV__O75140	REV__O75140	0.0461037	0.796	-2.01	1	-1
REV__O75185	REV__O75185	0.0674623	0.838	1.62	-0.808	0.808
REV__O75325	REV__O75325	0.461278	0.94	0.178	-0.0892	0.0892
REV__O75417	REV__O75417	0.122746	0.884	1.22	-0.609	0.609
REV__O75445	REV__O75445	0.784579	0.953	0.121	-0.0607	0.0607
REV__O75461	REV__O75461	0.0768662	0.85	0.278	-0.139	0.139
REV__O75473	REV__O75473	0.111683	0.878	0.254	-0.127	0.127
REV__O75525	REV__O75525	0.219684	0.914	-0.325	0.163	-0.163
REV__O75914	REV__O75914	0.0531023	0.813	-0.866	0.433	-0.433
REV__O75969	REV__O75969	0.963687	0.958	-0.0174	0.00871	-0.00871
REV__O94804	REV__O94804	0.662084	0.949	0.181	-0.0903	0.0903
REV__O94844	REV__O94844	0.0086533	0.422	0.94	-0.47	0.47
REV__O94885	REV__O94885	0.00706255	0.358	3.41	-1.7	1.7
REV__O94983	REV__O94983	0.147174	0.895	0.525	-0.262	0.262
REV__O95073	REV__O95073	0.741659	0.952	-0.114	0.0572	-0.0572
REV__O95347	REV__O95347	0.119817	0.883	0.274	-0.137	0.137
REV__O95405	REV__O95405	0.112263	0.879	3.5	-1.75	1.75
REV__O95490	REV__O95490	0.0287585	0.726	0.385	-0.192	0.192
REV__P00374	REV__P00374	0.85496	0.955	-0.187	0.0937	-0.0937
REV__P00540	REV__P00540	0.0617259	0.829	-1.04	0.522	-0.522
REV__P01112	REV__P01112	0.0159194	0.598	-1.5	0.751	-0.751
REV__P01210	REV__P01210	0.52229	0.943	0.594	-0.297	0.297
REV__P01266	REV__P01266	0.396861	0.935	-0.567	0.283	-0.283
REV__P02679	REV__P02679	0.567245	0.945	0.0743	-0.0372	0.0372
REV__P03956	REV__P03956	0.233734	0.917	1.23	-0.617	0.617
REV__P04075	REV__P04075	0.342202	0.931	0.252	-0.126	0.126
REV__P04424	REV__P04424	0.190408	0.908	1.93	-0.967	0.967
REV__P05166	REV__P05166	0.00249552	0.0914	-0.64	0.32	-0.32
REV__P06681	REV__P06681	0.186309	0.907	1.17	-0.584	0.584
REV__P07359	REV__P07359	0.0688021	0.84	-0.454	0.227	-0.227
REV__P08582	REV__P08582	0.227346	0.916	0.644	-0.322	0.322
REV__P08758	REV__P08758	0.369754	0.933	0.371	-0.186	0.186
REV__P0C1H6	REV__P0C1H6	0.304754	0.927	-1.05	0.527	-0.527
REV__P0C1S8	REV__P0C1S8	0.0135911	0.556	6.37	-3.18	3.18
REV__P0C221	REV__P0C221	0.209544	0.912	0.162	-0.0811	0.0811
REV__P0CG43	REV__P0CG43	0.254864	0.92	-0.297	0.148	-0.148
REV__P15144	REV__P15144	0.668935	0.949	0.0765	-0.0383	0.0383
REV__P18440	REV__P18440	0.347528	0.931	0.108	-0.0541	0.0541
REV__P18627	REV__P18627	0.0534881	0.814	-0.411	0.205	-0.205
REV__P20382	REV__P20382	0.070997	0.843	-2.45	1.22	-1.22
REV__P20742	REV__P20742	0.260672	0.921	1.25	-0.627	0.627
REV__P21359	REV__P21359	0.247369	0.919	1.66	-0.831	0.831
REV__P21675	REV__P21675	0.964061	0.958	-0.00741	0.0037	-0.0037
REV__P22102	REV__P22102	0.0302976	0.735	0.41	-0.205	0.205
REV__P22670	REV__P22670	0.626631	0.948	-0.264	0.132	-0.132
REV__P22792	REV__P22792	0.107945	0.876	0.697	-0.349	0.349
REV__P23083;REV__A0A0C4DH31	REV__P23083;REV__A0A0C4DH31	0.251606	0.92	-1.93	0.966	-0.966
REV__P23141	REV__P23141	0.161802	0.9	2.08	-1.04	1.04
REV__P25786	REV__P25786	0.839401	0.955	-0.157	0.0783	-0.0783
REV__P25963	REV__P25963	0.219532	0.914	-0.265	0.132	-0.132
REV__P26378	REV__P26378	0.0494429	0.805	1.83	-0.916	0.916
REV__P29374	REV__P29374	0.496971	0.942	0.321	-0.16	0.16
REV__P30520	REV__P30520	0.427941	0.937	0.123	-0.0614	0.0614
REV__P31645	REV__P31645	0.25597	0.92	0.408	-0.204	0.204
REV__P35125	REV__P35125	0.0392762	0.775	-1.44	0.722	-0.722
REV__P35240	REV__P35240	0.119285	0.882	0.829	-0.415	0.415
REV__P36222	REV__P36222	0.266638	0.922	-2.27	1.13	-1.13
REV__P38398	REV__P38398	0.291268	0.925	-0.348	0.174	-0.174
REV__P40763	REV__P40763	0.348673	0.931	-0.345	0.172	-0.172
REV__P42338	REV__P42338	0.40998	0.936	0.12	-0.0598	0.0598
REV__P42858	REV__P42858	0.754216	0.952	0.0454	-0.0227	0.0227
REV__P43364	REV__P43364	0.0550176	0.817	0.626	-0.313	0.313
REV__P46100	REV__P46100	0.740401	0.952	-0.072	0.036	-0.036
REV__P48067	REV__P48067	0.453189	0.939	-0.349	0.175	-0.175
REV__P48169	REV__P48169	0.118724	0.882	1.07	-0.534	0.534
REV__P48594	REV__P48594	0.0570725	0.821	0.279	-0.14	0.14
REV__P49715	REV__P49715	0.352698	0.932	-1.79	0.894	-0.894
REV__P51512	REV__P51512	0.0810753	0.854	-0.356	0.178	-0.178
REV__P51684	REV__P51684	0.648696	0.949	0.0765	-0.0383	0.0383
REV__P51690	REV__P51690	0.150771	0.896	0.22	-0.11	0.11
REV__P51797	REV__P51797	0.0543271	0.816	-2.79	1.39	-1.39
REV__P51812	REV__P51812	0.00324659	0.141	-2.11	1.06	-1.06
REV__P52564	REV__P52564	0.499041	0.942	0.676	-0.338	0.338
REV__P53396	REV__P53396	0.394291	0.935	0.317	-0.159	0.159
REV__P53618	REV__P53618	0.0371195	0.767	0.96	-0.48	0.48
REV__P53675	REV__P53675	0.00414907	0.2	0.595	-0.297	0.297
REV__P53992	REV__P53992	0.357387	0.932	2.02	-1.01	1.01
REV__P54756	REV__P54756	0.0951836	0.867	0.478	-0.239	0.239
REV__P54829	REV__P54829	0.848424	0.955	0.033	-0.0165	0.0165
REV__P54920	REV__P54920	0.214474	0.913	-1.73	0.863	-0.863
REV__P55011	REV__P55011	0.297936	0.926	1.21	-0.607	0.607
REV__P55056	REV__P55056	0.122713	0.884	-2.29	1.15	-1.15
REV__P56851	REV__P56851	0.263282	0.921	1.99	-0.996	0.996
REV__P56975	REV__P56975	0.319204	0.928	0.205	-0.103	0.103
REV__P61266	REV__P61266	0.743488	0.952	0.102	-0.0508	0.0508
REV__P61353	REV__P61353	0.0125412	0.534	0.69	-0.345	0.345
REV__P62068	REV__P62068	0.161205	0.9	1.98	-0.988	0.988
REV__P63130	REV__P63130	0.600042	0.947	-0.683	0.342	-0.342
REV__P68431;REV__Q71DI3;REV__P84243	REV__P68431;REV__Q71DI3;REV__P84243	0.293864	0.925	1.79	-0.895	0.895
REV__P78345	REV__P78345	0.193908	0.909	-0.667	0.333	-0.333
REV__P78386	REV__P78386	0.304455	0.927	-1.32	0.662	-0.662
REV__Q00610	REV__Q00610	0.0579868	0.823	-1.87	0.933	-0.933
REV__Q01995	REV__Q01995	0.305789	0.927	-1.01	0.504	-0.504
REV__Q02083	REV__Q02083	0.186947	0.907	0.675	-0.337	0.337
REV__Q02413	REV__Q02413	0.474709	0.94	-0.501	0.251	-0.251
REV__Q02962	REV__Q02962	0.0808211	0.854	2.4	-1.2	1.2
REV__Q04637	REV__Q04637	0.220439	0.914	-0.237	0.119	-0.119
REV__Q05329	REV__Q05329	0.702465	0.95	-0.114	0.057	-0.057
REV__Q05516	REV__Q05516	0.34288	0.931	0.659	-0.329	0.329
REV__Q06495	REV__Q06495	0.676724	0.95	0.548	-0.274	0.274
REV__Q06587	REV__Q06587	0.214625	0.913	1.69	-0.846	0.846
REV__Q07912	REV__Q07912	0.330924	0.929	-1.57	0.787	-0.787
REV__Q08493	REV__Q08493	0.545281	0.944	1.25	-0.624	0.624
REV__Q08AH3	REV__Q08AH3	0.747784	0.952	-0.0575	0.0287	-0.0287
REV__Q09666	REV__Q09666	0.0920887	0.865	-0.508	0.254	-0.254
REV__Q0P651	REV__Q0P651	0.0524753	0.812	0.287	-0.144	0.144
REV__Q0P6D2	REV__Q0P6D2	0.197462	0.909	-0.194	0.097	-0.097
REV__Q10567	REV__Q10567	0.625849	0.948	-0.182	0.0911	-0.0911
REV__Q10570	REV__Q10570	0.146199	0.894	-1.23	0.616	-0.616
REV__Q12768	REV__Q12768	0.4174	0.937	0.141	-0.0706	0.0706
REV__Q12815	REV__Q12815	0.058248	0.823	-0.756	0.378	-0.378
REV__Q12857	REV__Q12857	0.600935	0.947	0.635	-0.318	0.318
REV__Q12913	REV__Q12913	0.145168	0.894	-2.78	1.39	-1.39
REV__Q13087	REV__Q13087	0.248409	0.919	1.59	-0.794	0.794
REV__Q13144	REV__Q13144	0.174984	0.904	2.76	-1.38	1.38
REV__Q13224	REV__Q13224	0.423057	0.937	-1.95	0.976	-0.976
REV__Q13255	REV__Q13255	0.0680066	0.839	-3.29	1.65	-1.65
REV__Q13347	REV__Q13347	0.575891	0.946	-0.198	0.0988	-0.0988
REV__Q13418	REV__Q13418	0.0189083	0.64	0.451	-0.225	0.225
REV__Q13485	REV__Q13485	0.187214	0.907	0.364	-0.182	0.182
REV__Q13542	REV__Q13542	0.00924673	0.442	0.463	-0.231	0.231
REV__Q13625	REV__Q13625	0.154334	0.897	0.388	-0.194	0.194
REV__Q13938	REV__Q13938	0.215359	0.913	1.99	-0.997	0.997
REV__Q13948	REV__Q13948	0.847048	0.955	0.196	-0.0979	0.0979
REV__Q14106	REV__Q14106	0.0820712	0.855	-0.332	0.166	-0.166
REV__Q14126	REV__Q14126	0.261218	0.921	0.263	-0.131	0.131
REV__Q14195	REV__Q14195	0.0794108	0.853	-0.962	0.481	-0.481
REV__Q14410	REV__Q14410	0.263355	0.921	0.188	-0.094	0.094
REV__Q147U1	REV__Q147U1	0.527682	0.943	-0.117	0.0585	-0.0585
REV__Q14934	REV__Q14934	0.0595122	0.826	-2.92	1.46	-1.46
REV__Q15413	REV__Q15413	0.579082	0.946	0.217	-0.108	0.108
REV__Q15468	REV__Q15468	0.0348995	0.758	-2.09	1.05	-1.05
REV__Q16288	REV__Q16288	0.712057	0.951	-0.124	0.0618	-0.0618
REV__Q16719	REV__Q16719	0.14925	0.896	-1.76	0.881	-0.881
REV__Q16851	REV__Q16851	0.783685	0.953	-0.0379	0.0189	-0.0189
REV__Q2M2I5	REV__Q2M2I5	0.0683984	0.839	0.859	-0.429	0.429
REV__Q2NKJ3	REV__Q2NKJ3	0.339697	0.93	0.197	-0.0986	0.0986
REV__Q2TAL8	REV__Q2TAL8	0.851738	0.955	-0.289	0.145	-0.145
REV__Q3KQZ1	REV__Q3KQZ1	0.0466963	0.798	-1.77	0.885	-0.885
REV__Q4G0T1	REV__Q4G0T1	0.941629	0.957	-0.0899	0.0449	-0.0449
REV__Q50LG9	REV__Q50LG9	0.0313879	0.741	1.39	-0.695	0.695
REV__Q53QW1	REV__Q53QW1	0.216683	0.914	-0.948	0.474	-0.474
REV__Q562E7	REV__Q562E7	0.280648	0.924	1.07	-0.534	0.534
REV__Q58A45	REV__Q58A45	0.390021	0.935	-0.203	0.101	-0.101
REV__Q5BKX6	REV__Q5BKX6	0.454942	0.939	1.32	-0.66	0.66
REV__Q5JPB2	REV__Q5JPB2	0.179164	0.905	0.333	-0.166	0.166
REV__Q5JTH9	REV__Q5JTH9	0.02804	0.721	0.893	-0.446	0.446
REV__Q5SZK8	REV__Q5SZK8	0.00531285	0.27	-0.716	0.358	-0.358
REV__Q5T0F9	REV__Q5T0F9	0.216947	0.914	0.738	-0.369	0.369
REV__Q5T3F8	REV__Q5T3F8	0.0368423	0.766	0.875	-0.438	0.438
REV__Q5TGL8	REV__Q5TGL8	0.349515	0.931	-1.03	0.515	-0.515
REV__Q5TZF3	REV__Q5TZF3	0.358898	0.932	0.219	-0.109	0.109
REV__Q5VTJ3	REV__Q5VTJ3	0.449152	0.939	-1.48	0.741	-0.741
REV__Q5VTT5	REV__Q5VTT5	0.511793	0.942	-0.157	0.0785	-0.0785
REV__Q5VV16	REV__Q5VV16	0.486088	0.941	0.619	-0.31	0.31
REV__Q5VV52	REV__Q5VV52	0.951121	0.957	-0.0536	0.0268	-0.0268
REV__Q5VZK9	REV__Q5VZK9	0.0539028	0.815	0.567	-0.284	0.284
REV__Q6A162	REV__Q6A162	0.0693747	0.841	1.77	-0.887	0.887
REV__Q6EMB2	REV__Q6EMB2	0.521355	0.943	0.842	-0.421	0.421
REV__Q6ISB3	REV__Q6ISB3	0.117964	0.882	-1.4	0.698	-0.698
REV__Q6P387	REV__Q6P387	0.0917175	0.864	-0.355	0.177	-0.177
REV__Q6P4E1	REV__Q6P4E1	0.0877696	0.861	0.653	-0.327	0.327
REV__Q6PI48	REV__Q6PI48	0.280093	0.924	0.455	-0.227	0.227
REV__Q6PIY7	REV__Q6PIY7	0.087237	0.86	-2.3	1.15	-1.15
REV__Q6UVK1	REV__Q6UVK1	0.58504	0.946	0.21	-0.105	0.105
REV__Q6UXS9	REV__Q6UXS9	0.0519292	0.811	-0.64	0.32	-0.32
REV__Q6UY01	REV__Q6UY01	0.683557	0.95	-0.42	0.21	-0.21
REV__Q6UY14	REV__Q6UY14	0.303411	0.927	-0.563	0.282	-0.282
REV__Q6YHU6	REV__Q6YHU6	0.380798	0.934	0.283	-0.142	0.142
REV__Q6ZMJ2	REV__Q6ZMJ2	0.564925	0.945	-0.418	0.209	-0.209
REV__Q6ZNJ1	REV__Q6ZNJ1	0.444265	0.939	-0.506	0.253	-0.253
REV__Q6ZRH7	REV__Q6ZRH7	0.509354	0.942	-0.154	0.0771	-0.0771
REV__Q6ZU67	REV__Q6ZU67	0.663433	0.949	-0.108	0.0539	-0.0539
REV__Q6ZUV0	REV__Q6ZUV0	0.926611	0.957	0.0527	-0.0264	0.0264
REV__Q6ZUX3	REV__Q6ZUX3	0.876635	0.956	-0.132	0.0658	-0.0658
REV__Q6ZVL6	REV__Q6ZVL6	0.363046	0.932	-1.18	0.589	-0.589
REV__Q75T13	REV__Q75T13	0.216781	0.914	1.02	-0.509	0.509
REV__Q7RTR0	REV__Q7RTR0	0.364751	0.933	0.121	-0.0606	0.0606
REV__Q7RTW8	REV__Q7RTW8	0.227088	0.915	-0.393	0.197	-0.197
REV__Q7RTX7	REV__Q7RTX7	0.837295	0.955	-0.122	0.0609	-0.0609
REV__Q7Z2X4	REV__Q7Z2X4	0.0913297	0.864	-1.81	0.907	-0.907
REV__Q7Z3Z2	REV__Q7Z3Z2	0.439107	0.938	0.139	-0.0694	0.0694
REV__Q7Z3Z4	REV__Q7Z3Z4	0.298825	0.926	-1.04	0.518	-0.518
REV__Q86TP1	REV__Q86TP1	0.144007	0.894	0.216	-0.108	0.108
REV__Q86U44	REV__Q86U44	0.168987	0.902	-0.19	0.095	-0.095
REV__Q86UY5	REV__Q86UY5	0.273432	0.923	0.369	-0.184	0.184
REV__Q86VS8	REV__Q86VS8	0.487318	0.941	-0.234	0.117	-0.117
REV__Q86WI1	REV__Q86WI1	0.266237	0.922	0.235	-0.117	0.117
REV__Q86WU2	REV__Q86WU2	0.439497	0.938	0.496	-0.248	0.248
REV__Q86X10	REV__Q86X10	0.0324216	0.746	0.405	-0.202	0.202
REV__Q86XP3	REV__Q86XP3	0.798842	0.953	-0.103	0.0516	-0.0516
REV__Q86XT9	REV__Q86XT9	0.026814	0.713	-1.13	0.567	-0.567
REV__Q86YD1	REV__Q86YD1	0.79234	0.953	0.0819	-0.041	0.041
REV__Q8IVF1;REV__Q5VT03	REV__Q8IVF1;REV__Q5VT03	0.0107983	0.49	1.71	-0.853	0.853
REV__Q8IVF5	REV__Q8IVF5	0.0981698	0.869	-0.813	0.407	-0.407
REV__Q8IVU1	REV__Q8IVU1	0.191288	0.908	0.285	-0.143	0.143
REV__Q8IWS0	REV__Q8IWS0	0.729868	0.951	0.229	-0.114	0.114
REV__Q8IWU2	REV__Q8IWU2	0.133427	0.889	0.324	-0.162	0.162
REV__Q8IX04	REV__Q8IX04	0.970951	0.958	0.0048	-0.0024	0.0024
REV__Q8IYS1	REV__Q8IYS1	0.052711	0.812	1.12	-0.56	0.56
REV__Q8IZM9	REV__Q8IZM9	0.178463	0.905	0.607	-0.303	0.303
REV__Q8IZY2	REV__Q8IZY2	0.0404554	0.779	0.793	-0.397	0.397
REV__Q8N2M8	REV__Q8N2M8	0.188804	0.907	-1.63	0.814	-0.814
REV__Q8N3E9	REV__Q8N3E9	0.975904	0.958	0.0106	-0.0053	0.0053
REV__Q8N474	REV__Q8N474	0.765893	0.953	0.064	-0.032	0.032
REV__Q8N766	REV__Q8N766	0.36871	0.933	-0.251	0.125	-0.125
REV__Q8N960	REV__Q8N960	0.482541	0.941	0.0834	-0.0417	0.0417
REV__Q8N9A8	REV__Q8N9A8	0.0750299	0.848	-1.52	0.76	-0.76
REV__Q8N9V7	REV__Q8N9V7	0.325482	0.929	-1.72	0.86	-0.86
REV__Q8NA75	REV__Q8NA75	0.0513968	0.81	-1.08	0.539	-0.539
REV__Q8NDM7	REV__Q8NDM7	0.490794	0.941	0.729	-0.365	0.365
REV__Q8NFH4	REV__Q8NFH4	0.28304	0.924	-1.76	0.88	-0.88
REV__Q8NGE2	REV__Q8NGE2	0.866316	0.955	0.0453	-0.0227	0.0227
REV__Q8NGG2;REV__Q8NG75	REV__Q8NGG2;REV__Q8NG75	0.161789	0.9	0.586	-0.293	0.293
REV__Q8NGX5	REV__Q8NGX5	0.00299233	0.124	-2.3	1.15	-1.15
REV__Q8NH00;REV__Q6IFH4;REV__Q8N148;REV__O60403;REV__Q9H341;REV__Q8NGW1	REV__Q8NH00;REV__Q6IFH4;REV__Q8N148;REV__O60403;REV__Q9H341;REV__Q8NGW1	0.425522	0.937	-0.131	0.0655	-0.0655
REV__Q8NHH9	REV__Q8NHH9	0.453399	0.939	-0.301	0.15	-0.15
REV__Q8TAK5	REV__Q8TAK5	0.0679448	0.839	3.24	-1.62	1.62
REV__Q8TB22	REV__Q8TB22	0.464162	0.94	-0.651	0.326	-0.326
REV__Q8TBB1	REV__Q8TBB1	0.025133	0.701	-0.678	0.339	-0.339
REV__Q8TBF8	REV__Q8TBF8	0.357224	0.932	-1.3	0.649	-0.649
REV__Q8TC27	REV__Q8TC27	0.33678	0.93	0.598	-0.299	0.299
REV__Q8TCB0	REV__Q8TCB0	0.0787859	0.852	-0.487	0.243	-0.243
REV__Q8TCP9	REV__Q8TCP9	0.104935	0.874	-0.513	0.256	-0.256
REV__Q8TD26	REV__Q8TD26	0.154832	0.898	0.559	-0.279	0.279
REV__Q8TDW0	REV__Q8TDW0	0.0514723	0.81	-0.981	0.49	-0.49
REV__Q8TDW7	REV__Q8TDW7	0.280936	0.924	-0.299	0.149	-0.149
REV__Q8TDX6	REV__Q8TDX6	0.246194	0.919	-0.351	0.175	-0.175
REV__Q8TE82	REV__Q8TE82	0.173512	0.903	-2.61	1.31	-1.31
REV__Q8TF27	REV__Q8TF27	0.112789	0.879	-0.376	0.188	-0.188
REV__Q8WU66	REV__Q8WU66	0.0463128	0.797	0.398	-0.199	0.199
REV__Q8WVF1	REV__Q8WVF1	0.0751352	0.848	-2.42	1.21	-1.21
REV__Q8WVQ1	REV__Q8WVQ1	0.0220223	0.674	0.904	-0.452	0.452
REV__Q8WWU5	REV__Q8WWU5	0.52969	0.943	-0.722	0.361	-0.361
REV__Q8WWW8	REV__Q8WWW8	0.53384	0.944	-0.47	0.235	-0.235
REV__Q8WXI7	REV__Q8WXI7	0.775321	0.953	-0.0478	0.0239	-0.0239
REV__Q8WYQ9	REV__Q8WYQ9	0.415711	0.937	-0.333	0.167	-0.167
REV__Q92545	REV__Q92545	0.419577	0.937	-0.306	0.153	-0.153
REV__Q92565	REV__Q92565	0.29143	0.925	-0.896	0.448	-0.448
REV__Q92766	REV__Q92766	0.354567	0.932	1.6	-0.8	0.8
REV__Q96AN5	REV__Q96AN5	0.824535	0.954	0.0643	-0.0321	0.0321
REV__Q96AY2	REV__Q96AY2	0.274995	0.923	0.794	-0.397	0.397
REV__Q96EZ8	REV__Q96EZ8	0.0179646	0.628	-2.04	1.02	-1.02
REV__Q96GD3	REV__Q96GD3	0.733998	0.952	-0.069	0.0345	-0.0345
REV__Q96GJ1	REV__Q96GJ1	0.700138	0.95	0.117	-0.0585	0.0585
REV__Q96HN2	REV__Q96HN2	0.622155	0.948	0.292	-0.146	0.146
REV__Q96J66	REV__Q96J66	0.344145	0.931	1.3	-0.648	0.648
REV__Q96JB5	REV__Q96JB5	0.0055988	0.285	0.68	-0.34	0.34
REV__Q96JG6	REV__Q96JG6	0.585665	0.946	0.509	-0.255	0.255
REV__Q96KP1	REV__Q96KP1	0.383364	0.934	-0.327	0.164	-0.164
REV__Q96NG3	REV__Q96NG3	0.3584	0.932	-0.197	0.0984	-0.0984
REV__Q96NL1	REV__Q96NL1	0.630029	0.948	-0.216	0.108	-0.108
REV__Q96P70	REV__Q96P70	0.321737	0.929	-1.3	0.651	-0.651
REV__Q96PI1	REV__Q96PI1	0.950233	0.957	0.00932	-0.00466	0.00466
REV__Q96PV7	REV__Q96PV7	0.108154	0.876	-0.325	0.162	-0.162
REV__Q96RK0	REV__Q96RK0	0.348313	0.931	0.471	-0.235	0.235
REV__Q96RQ3	REV__Q96RQ3	0.265961	0.922	1.76	-0.878	0.878
REV__Q96RT1	REV__Q96RT1	0.177787	0.905	-1.05	0.526	-0.526
REV__Q96SB4	REV__Q96SB4	0.09461	0.867	0.497	-0.249	0.249
REV__Q99542	REV__Q99542	0.176651	0.904	0.459	-0.229	0.229
REV__Q99570	REV__Q99570	0.317849	0.928	2.28	-1.14	1.14
REV__Q99638	REV__Q99638	0.0172065	0.618	0.743	-0.371	0.371
REV__Q99666;REV__O14715	REV__Q99666;REV__O14715	0.00155495	0.0361	-0.632	0.316	-0.316
REV__Q99832	REV__Q99832	0.933219	0.957	0.0161	-0.00807	0.00807
REV__Q99972	REV__Q99972	0.0849998	0.858	0.871	-0.435	0.435
REV__Q9BRQ3	REV__Q9BRQ3	0.140014	0.892	0.782	-0.391	0.391
REV__Q9BTA0	REV__Q9BTA0	0.0119272	0.519	-0.581	0.291	-0.291
REV__Q9BUB4	REV__Q9BUB4	0.272092	0.923	-0.661	0.33	-0.33
REV__Q9BUL5	REV__Q9BUL5	0.287589	0.925	-1.05	0.527	-0.527
REV__Q9BV20	REV__Q9BV20	0.562646	0.945	0.725	-0.363	0.363
REV__Q9BX95	REV__Q9BX95	0.279087	0.924	-0.451	0.225	-0.225
REV__Q9BXA6	REV__Q9BXA6	0.338081	0.93	0.21	-0.105	0.105
REV__Q9BXB1	REV__Q9BXB1	0.0419866	0.784	2.26	-1.13	1.13
REV__Q9BXU0	REV__Q9BXU0	0.0952841	0.867	-1.59	0.795	-0.795
REV__Q9BY43	REV__Q9BY43	0.0551461	0.817	2.24	-1.12	1.12
REV__Q9GZS1	REV__Q9GZS1	0.0700647	0.842	-1.69	0.844	-0.844
REV__Q9GZU5	REV__Q9GZU5	0.0565988	0.82	2.47	-1.23	1.23
REV__Q9H0V1	REV__Q9H0V1	0.262186	0.921	0.679	-0.34	0.34
REV__Q9H0X4	REV__Q9H0X4	0.111962	0.878	-0.277	0.139	-0.139
REV__Q9H254	REV__Q9H254	0.0631509	0.832	-0.659	0.33	-0.33
REV__Q9H2C0	REV__Q9H2C0	0.434494	0.938	-1.93	0.966	-0.966
REV__Q9H313	REV__Q9H313	0.0382587	0.771	2.65	-1.33	1.33
REV__Q9H3U1	REV__Q9H3U1	0.508799	0.942	0.689	-0.345	0.345
REV__Q9H4B0	REV__Q9H4B0	0.798162	0.953	0.0398	-0.0199	0.0199
REV__Q9H4Z3	REV__Q9H4Z3	0.455924	0.939	-0.126	0.0628	-0.0628
REV__Q9H7L9	REV__Q9H7L9	0.891263	0.956	-0.024	0.012	-0.012
REV__Q9H9A7	REV__Q9H9A7	0.283333	0.924	0.921	-0.461	0.461
REV__Q9H9T3	REV__Q9H9T3	0.755382	0.952	0.0554	-0.0277	0.0277
REV__Q9HAR2	REV__Q9HAR2	0.373764	0.933	1.38	-0.692	0.692
REV__Q9HB55	REV__Q9HB55	0.0523605	0.812	1.38	-0.692	0.692
REV__Q9HBX3	REV__Q9HBX3	0.00259473	0.0978	1.57	-0.785	0.785
REV__Q9HBX8	REV__Q9HBX8	0.0314909	0.741	-1.15	0.576	-0.576
REV__Q9HC84	REV__Q9HC84	0.648882	0.949	0.106	-0.053	0.053
REV__Q9HCJ0	REV__Q9HCJ0	0.81173	0.954	0.0567	-0.0283	0.0283
REV__Q9HCP6	REV__Q9HCP6	0.431399	0.938	0.163	-0.0817	0.0817
REV__Q9N2K0	REV__Q9N2K0	0.0132802	0.55	0.454	-0.227	0.227
REV__Q9NP56	REV__Q9NP56	0.863648	0.955	-0.0892	0.0446	-0.0446
REV__Q9NPI7	REV__Q9NPI7	0.113002	0.879	1.25	-0.626	0.626
REV__Q9NPJ1	REV__Q9NPJ1	0.16207	0.9	2.04	-1.02	1.02
REV__Q9NPJ4	REV__Q9NPJ4	0.636211	0.948	0.973	-0.486	0.486
REV__Q9NQ75	REV__Q9NQ75	0.0111039	0.498	-0.671	0.336	-0.336
REV__Q9NQC3	REV__Q9NQC3	0.343463	0.931	-0.142	0.0709	-0.0709
REV__Q9NQR1	REV__Q9NQR1	0.571734	0.945	-0.09	0.045	-0.045
REV__Q9NQV6	REV__Q9NQV6	0.0229916	0.683	3.72	-1.86	1.86
REV__Q9NR96	REV__Q9NR96	0.24647	0.919	-2.7	1.35	-1.35
REV__Q9NS18	REV__Q9NS18	0.0347864	0.757	-0.612	0.306	-0.306
REV__Q9NSA0	REV__Q9NSA0	0.202877	0.911	0.972	-0.486	0.486
REV__Q9NSE4	REV__Q9NSE4	0.234607	0.917	-2.16	1.08	-1.08
REV__Q9NSY0	REV__Q9NSY0	0.544894	0.944	-0.649	0.324	-0.324
REV__Q9NT62	REV__Q9NT62	0.0121299	0.524	1.32	-0.658	0.658
REV__Q9NVH0	REV__Q9NVH0	0.265141	0.922	0.572	-0.286	0.286
REV__Q9NVX0	REV__Q9NVX0	0.386502	0.934	1.11	-0.555	0.555
REV__Q9NWM0	REV__Q9NWM0	0.115259	0.88	-2.62	1.31	-1.31
REV__Q9NX38	REV__Q9NX38	0.555254	0.945	0.307	-0.153	0.153
REV__Q9NX61	REV__Q9NX61	0.0199626	0.653	-0.753	0.377	-0.377
REV__Q9NXA8	REV__Q9NXA8	0.490679	0.941	0.355	-0.178	0.178
REV__Q9NXC2	REV__Q9NXC2	0.941188	0.957	-0.0258	0.0129	-0.0129
REV__Q9NXC5	REV__Q9NXC5	0.111382	0.878	0.44	-0.22	0.22
REV__Q9NXS3	REV__Q9NXS3	0.298919	0.926	-1.41	0.705	-0.705
REV__Q9NYQ6	REV__Q9NYQ6	0.664808	0.949	-0.0612	0.0306	-0.0306
REV__Q9NYT0	REV__Q9NYT0	0.0494121	0.805	0.429	-0.215	0.215
REV__Q9NZK5	REV__Q9NZK5	0.609763	0.947	0.106	-0.053	0.053
REV__Q9NZV7	REV__Q9NZV7	0.293613	0.925	-1.18	0.591	-0.591
REV__Q9NZW5	REV__Q9NZW5	0.321734	0.929	-0.909	0.454	-0.454
REV__Q9P1Y6	REV__Q9P1Y6	0.239748	0.918	0.282	-0.141	0.141
REV__Q9P246	REV__Q9P246	0.409619	0.936	-0.218	0.109	-0.109
REV__Q9P2S2	REV__Q9P2S2	0.778908	0.953	-0.153	0.0767	-0.0767
REV__Q9UDR5	REV__Q9UDR5	0.794382	0.953	0.0341	-0.0171	0.0171
REV__Q9UDY6	REV__Q9UDY6	0.566127	0.945	-1.55	0.774	-0.774
REV__Q9UHW9	REV__Q9UHW9	0.414485	0.937	0.952	-0.476	0.476
REV__Q9UIX4	REV__Q9UIX4	0.0744919	0.847	2.86	-1.43	1.43
REV__Q9UKN1	REV__Q9UKN1	0.606003	0.947	-0.102	0.0512	-0.0512
REV__Q9UKW6	REV__Q9UKW6	0.178823	0.905	1.11	-0.554	0.554
REV__Q9ULJ6	REV__Q9ULJ6	0.275364	0.923	-0.941	0.47	-0.47
REV__Q9UPW5	REV__Q9UPW5	0.666504	0.949	0.0949	-0.0474	0.0474
REV__Q9Y239	REV__Q9Y239	0.706602	0.951	-0.295	0.148	-0.148
REV__Q9Y297	REV__Q9Y297	0.00665475	0.339	2.7	-1.35	1.35
REV__Q9Y2A9	REV__Q9Y2A9	0.0387443	0.773	2.28	-1.14	1.14
REV__Q9Y2T3	REV__Q9Y2T3	0.0779419	0.851	-2.88	1.44	-1.44
REV__Q9Y315	REV__Q9Y315	0.0960207	0.868	1.45	-0.727	0.727
REV__Q9Y3C0	REV__Q9Y3C0	0.888367	0.956	-0.0249	0.0124	-0.0124
REV__Q9Y4A5	REV__Q9Y4A5	0.0629575	0.831	0.3	-0.15	0.15
REV__Q9Y4K1	REV__Q9Y4K1	0.369309	0.933	-0.488	0.244	-0.244
REV__Q9Y4U1	REV__Q9Y4U1	0.0122073	0.526	2.57	-1.28	1.28
REV__Q9Y4X5	REV__Q9Y4X5	0.297194	0.926	-0.277	0.138	-0.138
REV__Q9Y530	REV__Q9Y530	0.110165	0.877	-2.54	1.27	-1.27
REV__Q9Y597	REV__Q9Y597	0.0139962	0.564	0.466	-0.233	0.233
REV__Q9Y5B0	REV__Q9Y5B0	0.368919	0.933	-0.235	0.117	-0.117
REV__Q9Y5E9	REV__Q9Y5E9	0.0156101	0.593	0.952	-0.476	0.476
REV__Q9Y5J1	REV__Q9Y5J1	0.274029	0.923	2.7	-1.35	1.35
REV__Q9Y5Y4	REV__Q9Y5Y4	0.0228888	0.682	1.54	-0.77	0.77
RFC4	P35249	0.56264	0.945	-0.0865	0.0433	-0.0433
RGPD8	O14715	0.100875	0.871	-0.395	0.197	-0.197
RGS9	O75916	0.960343	0.958	0.0546	-0.0273	0.0273
RHOA	P61586	0.416654	0.937	0.293	-0.147	0.147
RHOC	P08134	0.0299219	0.733	0.723	-0.361	0.361
RIBC2	Q9H4K1	0.359086	0.932	-0.516	0.258	-0.258
RIC1	Q4ADV7	0.998091	0.958	0.00105	-0.000526	0.000526
RIF1	Q5UIP0	0.216136	0.913	0.815	-0.408	0.408
RMDN1	Q96DB5	0.226866	0.915	0.302	-0.151	0.151
RNF170	Q96K19	0.490612	0.941	-0.167	0.0836	-0.0836
RNF39	Q9H2S5	0.0380193	0.77	-1.82	0.91	-0.91
RNH1	P13489	0.0524121	0.812	0.336	-0.168	0.168
RNPC3	Q96LT9	0.980812	0.958	0.00386	-0.00193	0.00193
RNPEP	Q9H4A4	0.842079	0.955	-0.0315	0.0158	-0.0158
RPA1	P27694	0.0206511	0.66	-0.472	0.236	-0.236
RPA2	P15927	0.113755	0.879	-0.271	0.135	-0.135
RPL10	P27635	0.0567044	0.821	-0.494	0.247	-0.247
RPL10A	P62906	0.593881	0.946	1.06	-0.529	0.529
RPL11	P62913	0.128809	0.887	-0.962	0.481	-0.481
RPL12	P30050	0.6029	0.947	-0.621	0.31	-0.31
RPL13	P26373	0.0813692	0.855	-2.19	1.09	-1.09
RPL13A	P40429	0.0790785	0.852	-0.461	0.231	-0.231
RPL14	P50914	0.538318	0.944	-0.271	0.136	-0.136
RPL15	P61313	0.375863	0.934	0.296	-0.148	0.148
RPL17	P18621	0.105535	0.874	-0.351	0.176	-0.176
RPL18	Q07020	0.683955	0.95	-0.076	0.038	-0.038
RPL18A	Q02543	0.744259	0.952	0.0766	-0.0383	0.0383
RPL19	P84098	0.250381	0.919	-0.315	0.158	-0.158
RPL21	P46778	0.117745	0.882	0.255	-0.127	0.127
RPL22	P35268	0.476887	0.941	-0.313	0.156	-0.156
RPL23	P62829	0.0527278	0.812	-0.451	0.226	-0.226
RPL23A	P62750	0.0322809	0.745	1.17	-0.585	0.585
RPL24	P83731	0.295548	0.926	1.18	-0.592	0.592
RPL26;RPL26L1	P61254;Q9UNX3	0.51869	0.943	0.129	-0.0643	0.0643
RPL27	P61353	0.1758	0.904	-0.487	0.243	-0.243
RPL27A	P46776	0.623525	0.948	-0.127	0.0633	-0.0633
RPL28	P46779	0.269595	0.922	-0.495	0.248	-0.248
RPL29	P47914	0.0439905	0.79	2.64	-1.32	1.32
RPL3	P39023	0.208525	0.912	-0.163	0.0817	-0.0817
RPL30	P62888	0.795183	0.953	0.201	-0.101	0.101
RPL31	P62899	0.667135	0.949	-0.144	0.0721	-0.0721
RPL32	P62910	0.54529	0.944	-0.0941	0.047	-0.047
RPL34	P49207	0.553724	0.945	-0.151	0.0753	-0.0753
RPL35	P42766	0.264963	0.922	1.1	-0.55	0.55
RPL35A	P18077	0.781429	0.953	0.0669	-0.0334	0.0334
RPL36	Q9Y3U8	0.564208	0.945	0.593	-0.296	0.296
RPL37A	P61513	0.738706	0.952	-0.288	0.144	-0.144
RPL38	P63173	0.0800795	0.853	-0.692	0.346	-0.346
RPL4	P36578	0.463393	0.94	-0.147	0.0737	-0.0737
RPL5	P46777	0.0706746	0.842	-0.518	0.259	-0.259
RPL6	Q02878	0.412794	0.936	-0.234	0.117	-0.117
RPL7	P18124	0.150844	0.896	-0.3	0.15	-0.15
RPL7A	P62424	0.188404	0.907	-0.376	0.188	-0.188
RPL8	P62917	0.244016	0.918	-0.189	0.0944	-0.0944
RPL9	P32969	0.0172158	0.618	-0.405	0.202	-0.202
RPLP0;RPLP0P6	P05388;Q8NHW5	0.0995439	0.87	-0.45	0.225	-0.225
RPLP1	P05386	0.516665	0.943	-0.109	0.0546	-0.0546
RPLP2	P05387	0.236796	0.917	0.652	-0.326	0.326
RPN1	P04843	0.433791	0.938	0.119	-0.0593	0.0593
RPN2	P04844	0.805104	0.954	-0.028	0.014	-0.014
RPRD1B	Q9NQG5	0.430132	0.938	-0.174	0.0872	-0.0872
RPS10	P46783	0.26078	0.921	1.28	-0.638	0.638
RPS11	P62280	0.0250648	0.7	-0.373	0.186	-0.186
RPS12	P25398	0.242592	0.918	-0.554	0.277	-0.277
RPS13	P62277	0.551961	0.944	0.275	-0.137	0.137
RPS14	P62263	0.979263	0.958	-0.00385	0.00192	-0.00192
RPS15	P62841	0.390414	0.935	-0.21	0.105	-0.105
RPS15A	P62244	0.253245	0.92	-0.514	0.257	-0.257
RPS16	P62249	0.600992	0.947	0.797	-0.398	0.398
RPS17	P08708	0.52399	0.943	0.0929	-0.0465	0.0465
RPS18	P62269	0.450694	0.939	1.23	-0.616	0.616
RPS19	P39019	0.240375	0.918	-0.271	0.135	-0.135
RPS2	P15880	0.249734	0.919	-0.205	0.103	-0.103
RPS20	P60866	0.320247	0.928	2	-0.998	0.998
RPS21	P63220	0.996417	0.958	-0.000576	0.000288	-0.000288
RPS23	P62266	0.598802	0.947	-0.1	0.0501	-0.0501
RPS24	P62847	0.0135742	0.556	-0.469	0.234	-0.234
RPS26	P62854	0.518193	0.943	0.248	-0.124	0.124
RPS27	P42677;Q71UM5	0.440966	0.938	0.745	-0.372	0.372
RPS27A;UBB;UBC	P62979;P0CG47;P0CG48	0.350224	0.931	-0.81	0.405	-0.405
RPS28	P62857	0.606162	0.947	0.586	-0.293	0.293
RPS3	P23396	0.602662	0.947	0.892	-0.446	0.446
RPS3A	P61247	0.296949	0.926	-0.333	0.167	-0.167
RPS4X	P62701	0.423165	0.937	-0.23	0.115	-0.115
RPS5	P46782	0.51532	0.943	0.665	-0.332	0.332
RPS6	P62753	0.0128772	0.541	-0.474	0.237	-0.237
RPS6KA3	P51812	0.267547	0.922	2.36	-1.18	1.18
RPS7	P62081	0.846108	0.955	-0.0521	0.026	-0.026
RPS8	P62241	0.013841	0.561	-0.586	0.293	-0.293
RPS9	P46781	0.00879588	0.427	-0.559	0.279	-0.279
RPSA	P08865	0.664231	0.949	0.45	-0.225	0.225
RRBP1	Q9P2E9	0.600765	0.947	0.154	-0.077	0.077
RRM2	P31350	0.687589	0.95	-0.133	0.0666	-0.0666
RRP9	O43818	0.0558598	0.819	-0.341	0.171	-0.171
RSPH6A	Q9H0K4	0.0566586	0.82	1.39	-0.693	0.693
RSU1	Q15404	0.176227	0.904	0.696	-0.348	0.348
RTCA	O00442	0.331592	0.93	0.687	-0.344	0.344
RTCB	Q9Y3I0	0.285341	0.924	-0.141	0.0703	-0.0703
RTFDC1	Q9BY42	0.229503	0.916	-2.21	1.1	-1.1
RTN4	Q9NQC3	0.00441746	0.217	0.851	-0.425	0.425
RUVBL1	Q9Y265	0.733558	0.952	-0.137	0.0685	-0.0685
RUVBL2	Q9Y230	0.0105244	0.482	-0.429	0.214	-0.214
RWDD2A	Q9UIY3	0.0146168	0.576	-1.04	0.522	-0.522
S100A10	P60903	0.0941434	0.866	-0.275	0.138	-0.138
S100A11	P31949	0.183006	0.906	-0.399	0.199	-0.199
S100A13	Q99584	0.0945597	0.867	-0.516	0.258	-0.258
S100A16	Q96FQ6	0.318047	0.928	0.409	-0.205	0.205
S100A2	P29034	0.790891	0.953	0.128	-0.0642	0.0642
S100A5	P33763	0.157165	0.898	-0.327	0.164	-0.164
S100A6	P06703	0.205267	0.911	0.434	-0.217	0.217
SAE1	Q9UBE0	0.190745	0.908	1.43	-0.713	0.713
SAMD9	Q5K651	0.00352559	0.16	0.91	-0.455	0.455
SAMHD1	Q9Y3Z3	0.00290992	0.119	2.65	-1.33	1.33
SAR1A	Q9NR31	0.583058	0.946	-0.0835	0.0418	-0.0418
SAR1B	Q9Y6B6	0.8721	0.955	0.0402	-0.0201	0.0201
SARNP	P82979	0.10226	0.872	1.52	-0.762	0.762
SARS	P49591	0.23621	0.917	0.173	-0.0865	0.0865
SBDS	Q9Y3A5	0.714295	0.951	-0.146	0.0729	-0.0729
SCAMP3	O14828	0.696166	0.95	-0.236	0.118	-0.118
SCARB2	Q14108	0.00191403	0.0553	1.95	-0.977	0.977
SCFD1	Q8WVM8	0.736039	0.952	-0.0516	0.0258	-0.0258
SCNN1B	P51168	0.933263	0.957	0.021	-0.0105	0.0105
SCP2	P22307	0.127166	0.886	0.293	-0.147	0.147
SCRN1	Q12765	0.434482	0.938	0.14	-0.0701	0.0701
SDC4	P31431	0.311482	0.927	0.462	-0.231	0.231
SDCBP	O00560	0.0261844	0.708	-0.821	0.41	-0.41
SDHA	P31040	0.00629525	0.321	-0.501	0.251	-0.251
SDSL	Q96GA7	0.217071	0.914	0.326	-0.163	0.163
SEC13	P55735	0.082131	0.855	0.303	-0.151	0.151
SEC22A	Q96IW7	0.375902	0.934	0.676	-0.338	0.338
SEC22B	O75396	0.168169	0.902	0.863	-0.432	0.432
SEC23A	Q15436	0.352537	0.932	0.175	-0.0874	0.0874
SEC23B	Q15437	0.0403435	0.779	0.388	-0.194	0.194
SEC24C	P53992	0.0156596	0.594	0.543	-0.272	0.272
SEC31A	O94979	0.00601061	0.307	0.801	-0.4	0.4
SEC61A1	P61619	0.105802	0.875	0.762	-0.381	0.381
SEPHS1	P49903	0.143596	0.893	-0.276	0.138	-0.138
SERBP1	Q8NC51	0.845338	0.955	-0.0324	0.0162	-0.0162
SERPINA7	P05543	0.321794	0.929	-1.84	0.922	-0.922
SERPINB2	P05120	0.00635414	0.324	0.911	-0.456	0.456
SERPINB5	P36952	0.00591045	0.302	0.562	-0.281	0.281
SERPINB6	P35237	0.00983174	0.461	0.463	-0.232	0.232
SERPINB9	P50453	0.0588479	0.824	-1.31	0.656	-0.656
SERPINH1	P50454	0.00554327	0.282	0.504	-0.252	0.252
SET	Q01105	0.292311	0.925	0.626	-0.313	0.313
SF1	Q15637	0.530962	0.943	-0.247	0.124	-0.124
SF3A1	Q15459	0.274201	0.923	-0.132	0.066	-0.066
SF3A3	Q12874	0.0098368	0.462	-0.869	0.434	-0.434
SF3B1	O75533	0.060822	0.828	-0.377	0.188	-0.188
SF3B2	Q13435	0.948294	0.957	-0.021	0.0105	-0.0105
SF3B3	Q15393	0.0153416	0.589	-0.501	0.251	-0.251
SF3B4	Q15427	0.0242831	0.694	-0.725	0.362	-0.362
SFN	P31947	0.516027	0.943	0.187	-0.0933	0.0933
SFPQ	P23246	0.762845	0.952	-0.0354	0.0177	-0.0177
SGTA	O43765	0.619714	0.947	-0.086	0.043	-0.043
SH2D1A	O60880	0.018803	0.639	1.1	-0.55	0.55
SH2D2A	Q9NP31	0.316452	0.928	-0.93	0.465	-0.465
SH3BGRL	O75368	0.00372356	0.173	1.62	-0.81	0.81
SH3BGRL3	Q9H299	0.0305579	0.736	1.55	-0.774	0.774
SH3GL1	Q99961	0.359908	0.932	0.146	-0.073	0.073
SH3GLB1	Q9Y371	0.0834183	0.857	0.314	-0.157	0.157
SHMT2	P34897	0.0110921	0.498	-0.487	0.244	-0.244
SHOC2	Q9UQ13	0.31297	0.928	1.74	-0.868	0.868
SHPK	Q9UHJ6	0.145132	0.894	-1.43	0.714	-0.714
SIMC1	Q8NDZ2	0.201401	0.91	-1.02	0.512	-0.512
SKIV2L2	P42285	0.801103	0.954	-0.0448	0.0224	-0.0224
SKP1	P63208	0.576974	0.946	0.101	-0.0506	0.0506
SLC15A1	P46059	0.0366472	0.765	0.444	-0.222	0.222
SLC15A4	Q8N697	0.811042	0.954	-0.148	0.0738	-0.0738
SLC16A3	O15427	0.00049236	0.00201	0.829	-0.414	0.414
SLC1A5	Q15758	0.109517	0.877	-0.502	0.251	-0.251
SLC22A12	Q96S37	0.0478544	0.801	2.36	-1.18	1.18
SLC25A3	Q00325	0.0819684	0.855	-0.771	0.385	-0.385
SLC25A38	Q96DW6	0.00220974	0.0731	0.658	-0.329	0.329
SLC25A5	P05141	0.212831	0.913	-0.498	0.249	-0.249
SLC25A6	P12236	0.00179374	0.0484	-0.749	0.375	-0.375
SLC35F4	A4IF30	0.170506	0.902	3.14	-1.57	1.57
SLC38A2	Q96QD8	0.130989	0.888	0.765	-0.382	0.382
SLC3A2	P08195	0.588581	0.946	0.0725	-0.0363	0.0363
SLC4A1AP	Q9BWU0	0.50339	0.942	0.638	-0.319	0.319
SLC7A5	Q01650	0.89253	0.956	-0.059	0.0295	-0.0295
SLC9A3R1	O14745	0.30951	0.927	-0.855	0.427	-0.427
SLIRP	Q9GZT3	0.187731	0.907	1.45	-0.727	0.727
SLITRK4	Q8IW52	0.157442	0.898	1.28	-0.64	0.64
SLMO2	Q9Y3B1	0.191046	0.908	-0.691	0.346	-0.346
SMC1A	Q14683	0.778532	0.953	0.04	-0.02	0.02
SMC2	O95347	0.00997389	0.466	-0.735	0.368	-0.368
SMC4	Q9NTJ3	0.0172696	0.619	-0.4	0.2	-0.2
SMS	P52788	0.424983	0.937	-0.13	0.065	-0.065
SNAP29	O95721	0.120804	0.883	1.04	-0.521	0.521
SND1	Q7KZF4	0.213396	0.913	0.21	-0.105	0.105
SNRNP200	O75643	0.0873509	0.86	0.377	-0.189	0.189
SNRNP70	P08621	0.517193	0.943	0.09	-0.045	0.045
SNRPA	P09012	0.723477	0.951	-0.101	0.0506	-0.0506
SNRPA1	P09661	0.13365	0.889	-1.94	0.972	-0.972
SNRPD1	P62314	0.341111	0.93	1.4	-0.7	0.7
SNRPD2	P62316	0.0530513	0.813	-0.705	0.352	-0.352
SNRPD3	P62318	0.888485	0.956	-0.0832	0.0416	-0.0416
SNRPE	P62304	0.498936	0.942	0.553	-0.276	0.276
SNRPG;SNRPGP15	P62308;A8MWD9	0.737377	0.952	0.0767	-0.0383	0.0383
SNX3	O60493	0.301485	0.926	0.188	-0.094	0.094
SNX6	Q9UNH7	0.770982	0.953	0.135	-0.0673	0.0673
SOD1	P00441	0.675772	0.95	-0.114	0.0568	-0.0568
SOD2	P04179	0.380808	0.934	0.099	-0.0495	0.0495
SORD	Q00796	0.0426989	0.786	-0.595	0.297	-0.297
SPAG8	Q99932	0.729184	0.951	0.247	-0.124	0.124
SPC24	Q8NBT2	0.0059434	0.304	-0.747	0.373	-0.373
SPCS2	Q15005	0.75512	0.952	-0.0679	0.034	-0.034
SPDYE1	Q8NFV5	0.478049	0.941	-0.179	0.0894	-0.0894
SPECC1L	Q69YQ0	0.704703	0.951	-0.0579	0.0289	-0.0289
SPIN1	Q9Y657	0.558049	0.945	-0.822	0.411	-0.411
SPINT2	O43291	0.361593	0.932	0.196	-0.0981	0.0981
SPR	P35270	0.852719	0.955	0.0237	-0.0118	0.0118
SPTAN1	Q13813	0.0339364	0.753	0.389	-0.195	0.195
SPTBN1	Q01082	0.0721412	0.844	0.29	-0.145	0.145
SPTLC1	O15269	0.724792	0.951	0.0879	-0.0439	0.0439
SQRDL	Q9Y6N5	0.0274764	0.717	0.411	-0.205	0.205
SQSTM1	Q13501	0.0265778	0.711	0.349	-0.174	0.174
SRI	P30626	0.896649	0.956	-0.0211	0.0106	-0.0106
SRM	P19623	0.00294206	0.121	-0.759	0.38	-0.38
SRP14	P37108	0.112504	0.879	2.42	-1.21	1.21
SRP54	P61011	0.622705	0.948	-0.285	0.142	-0.142
SRP68	Q9UHB9	0.818742	0.954	0.0295	-0.0147	0.0147
SRP72	O76094	0.120702	0.883	0.322	-0.161	0.161
SRPR	P08240	0.0335055	0.751	-0.342	0.171	-0.171
SRPRB	Q9Y5M8	0.554493	0.945	0.377	-0.188	0.188
SRSF1	Q07955	0.288437	0.925	2.17	-1.09	1.09
SRSF2	Q01130	0.3007	0.926	0.141	-0.0706	0.0706
SRSF3	P84103	0.19953	0.91	-0.288	0.144	-0.144
[truncated: 256 more rows]

## Sheet: Table S6
Table S6 - 50% Inhibitory Concentration (µM) of 10074-G5 (MYC inhibitor) treatment in CCA cell lines across time points
Cell Line/Time Point	24 hours	48 hours	72 hours
KKU-213	117.3	50.17	40.2
RBE	260.3	65.75	46.79
